# Supplementary material
Source: MDPI journal article supplement (https://www.mdpi.com/2071-1050/10/12/4434)
Supplement: s1 [file s1]

## Sheet: Codebuch
CODIERUNGSHANDBUCH
Tabellenerklärung
Idee		1:1 übertragene Ideen der Workshopteilnehmer
Dedkutive Codierung		Codierung nach intenren und externen Faktoren der Handlungsbeeinflussung
Induktive Codierung		Thematische Codierung
Punkte		Während des Workshops von Teilnehmern vergeben Punkte als Kennzeichnung von favorisierten Ideen
Farbe		Farbe der Ideen-Karte, als Zuordnung zum entsprechenden Arbeitsschritt/ Prozess
Favoritenverwendung		Verwendung der am meisten favorisierten Ideen für die abschließende Projektentwicklung
Ort		Ort, an dem der Workshop stattgefunden hat, in dem die Idee generiert wurde
Codekategorien (deduktiv)
Kategorie	Code	Code-Notizen
Intern	1	Intern bedeutet Individuum oder ICH-bezogen.
Intern +	2	Bezugserweiterung durch themenspezifische Interpretation der Daten.
Extern	3	Extern beudetet umgebende Umwelt-Faktoren (Gesellschaft/ Umwelt/ Strukturen/ Systeme)
Extern +	4	Bezugserweiterung durch themenspezifische Interpretation der Daten.
Nicht verwertbar	0	Trifft weder auf intern noch extern im Kontext der Fragestellung und des theoretischen Hintergundes zu. i) Reine Fragen, von denen keine indirekte Idee gelesen werden kann (ii) Ideen, die irrelevant sind oder keinen direkten Bezug zu unserer Forschungsfrage, (iii) das Themenfeld der nachhaltigen Ernährung und (iv) nachhaltige Nahrungsmittelsysteme haben.
Codierungsprozess
1. Liegt hier ein interner (auf das Individuum bezogen) oder externer Faktor (Faktoren aus dem Umfeld des Individuums) der auf die Verhaltenskontrolle einwirken kann vor?
2. Ist aus den Daten ein konkret und eindeutig formulierter Bezug zum Thema bzw. zur Fragestellung (Wie können wir bei der Adaption von Nachhaltigen Ernährungsformen die Intentions-Verhaltens-Lücke schließen?) zu lesen? Dann codieren mit 1 für intern oder 3 für extern.
3. Muss der Codierer bei einer neutralen, objektiven Betrachtung der Daten einen Schritt weiter denken bzw. die Daten interpretieren, um diese sinngemäß dem thematischen Kontext der Fragestellung zuzuordnen? Dann codieren mit 2 für intern und 4 für extern.
4. Können die Daten weder als 1, 2, 3 oder 4 codiert werden, sind sie wahrscheinlich nicht verwertbar. Oder sind Daten als Fragestellungen formuliert, aus denen keine indirekte Aussage gelesen werden kann? Sind es Ideen, die irrelevant sind oder keinen direkten Bezug zu unserer Forschungsfrage oder das Themenfeld der nachhaltigen Ernährung und nachhaltige Nahrungsmittelsysteme haben? Dann codiere…
Codekategorien (induktiv)
Thematische Kategorie	Code	Erklärung der Kategorie
Verfügbarkeit	A	Betrifft die Verfügbarkeit von Lebensmitteln durch Angebot, Zugang und Absatzwege.
Bildung	B	Bildung beinhaltet hier auch die Unterthemen Austausch, Aufklärung, Informationsbereitstellung und Lernen.
Transparenz	C	Die Transparenz ist bezogen auf die Produktions- und Herstellungsweise sowie auf die Angaben zu den Lebensmitteln (Aushang, Verpackungsdruck, Kennzeichnung etc.).
Werbung	D	Unter der Kategorie Werbung fallen alle Maßnahmen, das Thema nachhaltige Ernährung, Lebensmittel und Erzeugung in die Öffentlichkeit zu bringen, um die Wahrnehmung zu steigern. Hier drunter fallen Kampagnen, Imageaufbau, Vorbildinszenierungen und Marketingmaßnahmen.
Gemeinschaft	E	Mit Gemeinschaft ist kollektives Handeln innerhalb von Familien und Gesellschaften gemeint.
Politik	F	In die Kategorie Politik fallen vorweigend politische Maßnahmen wie Förderung/ Subventionierung und Verbot/ Sanktionierung, sowie Gesetzgebungen.
Landwirtschaft	G	Unter Landwirtschaft fallen auch Themen der Lebensmittelerzeugung und die Rolle der Landwirte.
Lebensmittelpreis	H	Lebensmittelpreise: Themen die mit den Kosten/ Preisen von Lebensmitteln zusammenhängen.
Bio	I	Aspekte die mit Bio-Lebensmitteln, Bio-Landwirtschaft in Verbindung stehen.
Regional	J	Regionale Lebebensmittel und - erzeugung, sowie Vermarktung
Saisonal	K	Saisonale Lebebensmittel und - erzeugung.
Einkauf	L	Alle Themen die den Lebensmitteleinkauf betreffen.
Kochen	M	Zubereitung von Lebensmitteln, Küchenbereitstellung und -nutzungsangebote
Essen	N	Betrifft die Nahrungsaufnahme
Bewusstsein	O	Bewusstsein gilt als Überbegriff für Bewusstseinsbildung, Achtsamkeit und Wertschätzung.
Kultur	P	Kulturelle Aspekte wie Ernährungskultur und verschieden Kulturelle Praktiken.
Zeit	Q	Der Faktor Zeit, freie Zeit, Arbeitszeit, und Entschleunigung.
Stadt	R	Dieser Überbegriff umfasst alle explizit agsprochenen urbanen Themen wie Urban Gardening, urbanes Leben, urbane Stadtverwaltung und -gestaltung.
Verpackung	S	Mit Verpackung ist hier nur die Art und der Einsatz der Verpackung gemeint. Entweder keine oder möglichst wenig und aus nachhaltigen Materialien. Es get nicht darum, was auf den Verpackungen steht - diese Themen entfallen in die Kategorie Transparenz.

## Sheet: Auszählungen
Auszählung der Codierungen						Auflistung der Top 25 Favoriten				Davon Anteile an Codierungen (Top 25)
Dedkutive Codierung
Code	Datenanzahl	%-Anteil	Gerundet	Gesamt		Punkte	Idee	Code		Code	Datenanzahl	%-Anteil	Gesamt
0	66	0.054	0.054	0.054		11	Bewusst und ressourcenschonend konsumieren/ leben	2		0	0	0	0
1	26	0.0213	0.0213	0.137		9	Verkauf vom Hof, ohne viele Prozessschritte	4		1	0	0	0.04
2	142	0.1161	0.1161			8	Mehr verpackungsfreie Lebensmittelläden	3		2	1	0.04
3	178	0.1455	0.1455	0.809		8	Aufklärung und Bildung	4		3	7	0.28	0.96
4	811	0.6631	0.6631			7	Wert-/ werbungsfreie Lebensmittel (Bewertung nur nach Inhalt, z.B. „mit x % Fruchtanteil“ anstatt „mit hohem Anteil an …“	4		4	17	0.68
Insgesamt	1223	1	1	1		7	Verbraucher besuchen Bauernhöfe und sprechen über Tierhaltung, Düngung usw.	4
						7	Ernährung als Unterrichtsfach (Kochen, Gartenarbeit...)	4
Induktive Codierung						7	100 % Verwertung	4
						7	Mehr Aufklärung schon in Schulen	4
Code	Datenanzahl					6	Eine Produktdatenbank, die die wahren Kosten (Ressourcenverbrauch etc.) einpreist (z.B. Wurst Aldi 0,69€ -> Erdwahre Kosten 2,69 €)	3
A	175					6	Lebensmittelpreise müssen die Gesamtkosten darstellen	3
B	289					6	Massentierhaltung verbieten (plus neue strengere Düngemittelverordnung)	4
C	80					6	Mehr Zeitressourcen für Menschen schaffen	4
D	113					5	Preise für Lebensmittel müssen die Vollkosten abbilden	3
E	111					5	Höherer Steuersatz für Tierisches und Ungesundes. Niedrigere für pflanzliche und gesunde Lebensmittel	3
F	178					5	Belohnungssysteme für nachhaltige Ernährung schaffen	3
G	141					5	Infrastruktur für Nachhaltige Strategien schaffen (z.B. für Nachbarschaftskooperation) Rechtliche Vereinfachungen z.B. für (Food)Sharingpoints; Einkaufsgemeinschaften, Stelle/ Arbeitsplatz schaffen, der die Infrastruktur pflegt, Arbeiten ausführt	3
H	59					5	Nachhaltigkeitspartys analog „Tupperware“	4
I	113					5	Ökologischen Fußabdruck auf dem Produkt verzeichnen	4
J	61					5	Verantwortungsvolle Schulverpflegung – Lerneffekt der Kinder	4
K	21					5	Lobbyismus in Agrar- und Lebensmittelindustrie sehr streng regeln bzw. verbieten	4
L	22					5	Nachhaltigkeit „spürbar“ machen – Preis?	4
M	59					5	Staatliche Unterstützung	4
N	32					5	Bio-Anbau als einzige Lösung für die Welternährung	4
O	79					5	Integrierte Produktion/ Verarbeitung in der Stadt z.B.: Urban Gardening, Kulturacker	4
P	20
Q	33
R	32
S	25

## Sheet: Daten_Codierung
Idee	Deduktive Codierung	Induktive Codierung					Punkte	Farbe	Favoritverwendung	Ort
Menschen in Andersartigkeit/ Individualität beachten und begegnen	0						2	Gelb	ja	Dortmund
Individualverkehr (Autos) -> Abgase in den Städten reduzieren	0						0	Gelb	nein	Dortmund
Wissen – Aktivität –> Handeln	0						0	Gelb	nein	Dortmund
Nicht: „Du böse, ich gut“	0						0	Gelb	nein	Dortmund
Mit einfachen Dingen beginnen: „Wer duscht gern mit toten Tieren?“	0						0	Gelb	nein	Dortmund
Nahrung auf psychischer Ebene -> genährt sein	0						1	Orange	nein	Dortmund
Entfremdung angehen -> Kontakt zur Natur	0						1	Orange	nein	Dortmund
Lernen, was heute überhaupt „einfach“ ist	0						0	Orange	nein	Dortmund
Andere anregen durch eine kleine Pflanze	0						0	Orange	nein	Dortmund
Vertrauen in die Kraft von natürlichen Prozessen	0						0	Orange	nein	Dortmund
Sozialkompetenzen vorrangig vor dogmatischen Werten	0						1	Blau	nein	Dortmund
Inhalt: keine Produkte, sondern Haltung! Jemand begleitet Themenabende	0						0	Blau	nein	Dortmund
Vertrauen schaffen in die Zukunft, Anderen zuhören, ihre Ängste verstehen und sich mit ihnen auseinandersetzen.	0						2	Grün	ja	Dortmund
Inklusion fördern auf allen Ebenen: soziale Schicht, Gesundheit, Alter, Kultur, Nationalität, Geschlecht; Ghettoisierung entgegenwirken	0						0	Rot	nein	Dortmund
Arbeitseffektivität messen und nicht Anwesenheit; Gerechtes Bezugssystem (Bsp. überhöhte Pensionen & Gehälter)	0						0	Rot	nein	Dortmund
Verderben, Konservierung	0						0	Gelb	nein	Kassel-Witzenhausen
Neue Wertmaßstäbe setzen, z.B. -Verbot von Zoos, Zirkussen mit Tieren etc. -Achtung von Tieren	0						0	Gelb	nein	Kassel-Witzenhausen
Keine Verschönung	0						0	Gelb	nein	Kassel-Witzenhausen
Langzeitwirkung/ Effekte von Zusätzen (Antibiotika) von genetischer Manipulation	0						0	Gelb	nein	Kassel-Witzenhausen
Nahrungsaufnahme – Mittel zum Zweck	0						0	Gelb	nein	Kassel-Witzenhausen
Wie kann in einer kurzlebigen Welt die Verknappung von Ressourcen vermittelt werden?	0						1	Orange	nein	Kassel-Witzenhausen
Welche Voraussetzung bzw. Situationen braucht es, welche eine Gesellschaft bzw. Individuen zum Handeln zu nötigen?	0						0	Orange	nein	Kassel-Witzenhausen
Unterschiede der Wahrnehmung in Menschenleben und Erdzeitaltern	0						0	Orange	nein	Kassel-Witzenhausen
Wie passen Leben im Überfluss mit der Hungersnot zusammen?	0						0	Orange	nein	Kassel-Witzenhausen
Unser Konsum beeinflusst Konsummöglichkeit anderer Menschen?	0						0	Orange	nein	Kassel-Witzenhausen
Verwertungs-Kreisläufe in urbanen Raum möglich?	0						0	Blau	nein	Kassel-Witzenhausen
Städte produzieren Müll - warum?	0						0	Blau	nein	Kassel-Witzenhausen
Braucht es Verpackung (Plastik)?	0						0	Blau	nein	Kassel-Witzenhausen
Die Dummen rennen, die Klugen warten, die Weisen gehen in den Garten.	0						0	Rot	nein	Kassel-Witzenhausen
Mehr Praxiserfahrungen	0						0	Gelb	nein	Hamburg
Mehr Ressourcen nutzen	0						0	Gelb	nein	Hamburg
Hände weg von der Natur!	0						2	Orange	ja	Hamburg
Angst vor menschlichen Einfluss und Vernichtung des Lebens (aus Wasser wird Politik)	0						0	Orange	nein	Hamburg
Wasser als Ursprung für Leben und Hoffnung wird als Geschenk Gottes betrachtet	0						0	Orange	nein	Hamburg
Geiz ist ungeil – Buttons mit solchen Sprüchen tragen	0						1	Blau	ja	Hamburg
Sünder an den Pranger stellen!	0						0	Blau	nein	Hamburg
Natürliche Auslese	0						0	Rot	nein	Hamburg
Wo liegt generell das „Problem“ wenn Menschen trotz Bewusstsein nicht danach handeln?	0						0	Gelb	nein	Berlin
Allmende: Überschaubare Sozietäten	0						0	Gelb	nein	Berlin
Neid, Ängste sind problematisch	0						0	Gelb	nein	Berlin
Mehr Natur von Kindergarten an	0						0	Gelb	nein	Berlin
Lässt sich der heutige „Luxus“ mit Nachhaltigkeit vereinbaren?	0						0	Gelb	nein	Berlin
Zwei Wasserkreisläufe im Haushalt	0						2	Orange	ja	Berlin
Spätestens aus der „Not“ heraus?!	0						0	Orange	nein	Berlin
Verpackung als Notwendigkeit?	0						0	Orange	nein	Berlin
Repair-Cafés	0						0	Orange	nein	Berlin
Zeit! Was bedeutet zu wenig Zeit haben?	0						0	Blau	nein	Berlin
Offenheit	0						0	Grün	nein	Berlin
Keine genveränderten Versuche an Menschen	0						0	Rot	nein	Berlin
Schocktherapie	0						0	Gelb	nein	Münster
Wie können frühere Ernährungsformen helfen nachhaltiger zu handeln?	0						3	Orange	ja	Münster
Ausgeglichen handeln	0						0	Orange	nein	Münster
Die Konsequenzen anderer tragen	0						0	Orange	nein	Münster
Kann Bio/ nachhaltig massentauglich werden? Ist es dann noch nachhaltig?	0						0	Orange	nein	Münster
Wie kann der Verbraucher sich der Nachhaltigkeit seiner Ernährung bewusster werden? (->zur Verantwortung ziehen?)	0						2	Blau	ja	Münster
Wie lässt sich das gesunde Maß finden?	0						0	Blau	nein	Münster
Mehr Abfall im Singlehaushalt	0						0	Blau	nein	Münster
„Weltoffen“	0						0	Rot	nein	Münster
Sind die Werte „falsch“? Überhöht?	0						0	Gelb	nein	Freiburg
Welche Handlungsmöglichkeiten bestehen? Wie lassen sie sich erweitern?	0						0	Gelb	nein	Freiburg
Ist der Lückenschluss die Lösung?	0						0	Gelb	nein	Freiburg
Wissen/Werte- Handeln-Lücke; Ziel: Vorteil Vorstellung	0						0	Gelb	nein	Freiburg
Was gibt es vor Ort?	0						0	Blau	nein	Freiburg
Radikale Veränderungen	0						2	Rot	ja	Freiburg
Kapitalismus zerschlagen!	0						0	Rot	nein	Freiburg
(Dunkle) Mächte vernichten (Episode VIII)	0						0	Rot	nein	Freiburg
Ernährung selbst erfahren – wo kommen Äpfel her, woraus besteht mein Frühstücksaufschnitt?	1	B					3	Gelb	ja	Dortmund
Selbsterfahrung in der Lebensmittelzubereitung	1	B	M				1	Gelb	nein	Dortmund
Gelassenheit schaffen: Es darf kein „Stress“ sein, sich nachhaltig zu ernähren, keiner sollte sich unter Druck gesetzt fühlen -> Dieser Wert/ Wissen darf nicht aufgezwängt werden/ von Innen kommen -> gibt es überhaupt richtig /falsch	1	Q					1	Orange	nein	Dortmund
Essen als bewusste Auszeit	1	O	Q				1	Blau	nein	Dortmund
Nicht im Übermaß kaufen, dann kann man sich auch gesunde Sachen kaufen	1						0	Rot	nein	Dortmund
Gesund kochen lernen	1	B	M				1	Gelb	nein	Kassel-Witzenhausen
Sich Zeit nehmen für das Einkaufen, Essen und Kochen	1	L	M	N	Q		0	Gelb	nein	Kassel-Witzenhausen
Wichtiger Schritt: Das Einkaufen -> Denn: Hat man keine ungesunden und nicht-nachhaltigen Produkte zuhause, isst man sie nicht oder jedenfalls weniger	1	L					0	Gelb	nein	Kassel-Witzenhausen
Lebensmittel vor Ort beziehen, z.B. Solawis, Landwirte, Bioläden, selbst Gärtnern, Gemüseparzellen, alten Obstbaumbestand (öffentlich) nutzen (an Wegesrändern)	1	A	I	L			3	Orange	ja	Kassel-Witzenhausen
Mehr Zeit in Alltag für Essen und Kochen; Reihum füreinander Kochen	1	M	N	Q			2	Blau	ja	Kassel-Witzenhausen
Zeit (genügend) zum Essen an der Arbeit/ Schule/ Uni einplanen	1	N	Q				3	Blau	ja	Kassel-Witzenhausen
Zeit nehmen für das Essen	1	N	Q				0	Blau	nein	Kassel-Witzenhausen
Individuellen Nutzen nachhaltiger Ernährung herausstellen	1	O					3	Grün	ja	Kassel-Witzenhausen
Zeit für Kochen und Essen als Ereignis	1	M	N	Q			0	Rot	nein	Kassel-Witzenhausen
Man braucht den Neustart, vom Körper auch von der Besinnung. Ich mache die Tage ohne essen, nur Wasser. Zwei Mal pro Jahr machen ich 7-14 Tage Hungern (Fastenkur)	1	O					0	Gelb	nein	Hamburg
Problem: Zeitdruck -> keine nachhaltige Ernährung möglich; Lösung: Zeit finden, sich Zeit zum Essen nehmen	1	N	Q				1	Blau	nein	Hamburg
Ideen für schnelle, nachhaltige Ernährungsoptionen finden (z.B. mehr Rezepte, mehr nachhaltige Restaurants)	1	A					0	Blau	nein	Hamburg
Vom Ziel her denken: Ernährung als Mittel für Ziel, Gesundheit, Fitness, Genuss, Lernen, (Bewusstseinsbildung, Zertifizierung/ Hinweise)	1	O					0	Grün	nein	Berlin
Lebensmittel (Bio etc.) für unterwegs einpacken	1	A	I				0	Gelb	nein	Münster
Sich selbst Hinterfragen ob „Lusthunger“ oder richtig Hunger!	1	O					1	Blau	nein	Münster
Oft ist es eine Zeitfrage. Selbst wenn Wissen und Werte über gesunde und nachhaltige Ernährung vorhanden sind, ist es schwer in den Alltag einer großen Familie einzubringen und umzusetzen -> mehr Zeit für Ernährung	1	Q					0	Gelb	nein	Freiburg
Mehr Zeit für Ernährung einzubringen und umzusetzen	1	Q					0	Gelb	nein	Freiburg
Zeit nehmen für Vorbereitung/ Beschaffung des Essens	1	L	M	Q			0	Blau	nein	Freiburg
Zeit für Ernährung, Anbauerfahrungen, Zubereitung geben	1	B	M	Q			1	Rot	nein	Freiburg
Neue Essgewohnheiten entwickeln	1	N					0	Rot	nein	Freiburg
Mehr Zeit für Nahrungszunahme: bewusstes Essen. Essen schmecken, erspüren	1	N	O	Q			0	Rot	nein	Freiburg
Kleinigkeiten umsetzen -> am Anfang nicht den Anspruch haben, alles richtig machen zu müssen	2						4	Gelb	ja	Dortmund
Austausch	2	B					1	Gelb	nein	Dortmund
Kontakt mit Bauern pflegen -> regional oder auch international	2	B	J				1	Gelb	nein	Dortmund
Verantwortung als Konsument erkennen	2	O					0	Gelb	nein	Dortmund
Ich: Kritisch „Handeln“ hinterfragen, reflektieren, neu Handeln; Andere: Reden, vorleben, austauschen	2	O					0	Gelb	nein	Dortmund
Bewusste Erfahrungen in anderen Kulturen bspw. Im Urlaub sammeln	2	O	P				0	Gelb	nein	Dortmund
Verknüpfung Einkaufen (z.B. Bio-Produkte) mit z.B. Radtour	2	L	I				0	Gelb	nein	Dortmund
Kreative Ernährung	2						0	Gelb	nein	Dortmund
Erkennen, dass auch Kleinigkeiten etwas verändern können (auch ich kann etwas bewegen, auch wenn ich nur einer von 8 Milliarden bin)	2	O					2	Orange	ja	Dortmund
Gleichgesinnte finden, die zusammen etwas bewegen können	2	E					2	Orange	nein	Dortmund
Jeder könnte für sich eine Vision entwickeln, wie er sich ernähren möchte und möglichst wenig „Schaden“ anrichtet.	2	O					1	Orange	nein	Dortmund
Bewusstsein schaffen: Was hat mein Verhalten für Auswirkungen auf die anderen Menschen der Welt im Hinblick darauf, dass wir uns alle die Welt teilen?	2	O					0	Orange	nein	Dortmund
Ressourcen achtsam nutzen -> durch direkten Kontakt zu ihrer Erzeugung	2	O	B				0	Orange	nein	Dortmund
Sich selbst daran erinnern, welche Unterschiede bestehen. Handeln: was ist daran gut, was schlecht?	2	O					0	Orange	nein	Dortmund
Der Einzelne ist auch Teil der Gemeinschaft	2	E					0	Orange	nein	Dortmund
Betroffenheit löst Handlungsbedarf aus -> Beschäftigung mit Themen anregen	2	O					3	Blau	ja	Dortmund
Schließen der Lücke zwischen Zeit- und Geldressourcen	2	Q	H				4	Blau	ja	Dortmund
Lokale Auseinandersetzung mit Nahrungsmittelproduktion	2	O					1	Blau	nein	Dortmund
Andere Menschen inspirieren durch neue Kochideen, regionale/ saisonales Essen besser umsetzen	2	J	K	M			1	Blau	nein	Dortmund
Kulturelle Unterschiede bzgl. Ernährung kennenlernen, ausprobieren, erfragen (Kochbuch der Nationen)	2	B	P				3	Grün	ja	Dortmund
Fragen stellen dürfen -> konkrete Antworten finden. Nicht um die „Schattenseite“ zu definieren sondern um das Gute zu finden; dann entscheiden	2	B					3	Grün	ja	Dortmund
Zeit zum Hinterfragen von Gewohnheiten nehmen	2	O	Q				2	Grün	nein	Dortmund
Private Kochtreffen mit Bekannten/ Freunden/ Fremden	2	E	M				1	Grün	nein	Dortmund
Sich mit Gleichgesinnten verbinden -> Austausch, Unterstützung, Stärkung	2	E					1	Grün	nein	Dortmund
Strukturen suchen, wo ich leben kann woran ich glaube. Raus aus der Stad, aus dem Land?	2						0	Grün	nein	Dortmund
„Früchte der Arbeit ernten“, Anstrengung lohnenswert sehen	2	O					0	Grün	nein	Dortmund
Beim Kochen Erfahrung sammeln und dazu lernen (leicht und spielerisch)	2	B	M				0	Grün	nein	Dortmund
Veranstaltungen (Messen, Feste…) nutzen: mit Freunden, Kindern, Nachbarn... um Lebensweise kennenlernen als unverbindliche Info-Quelle	2	B					0	Grün	nein	Dortmund
Sich bewusstmachen, wie viel ich wegwerfe	2	O					0	Grün	nein	Dortmund
Neue Erfahrungen machen: Settingwechsel durch: Kochkurse, neue Rezepte, andere Menschen	2	B	M	O			0	Grün	nein	Dortmund
Bereit sein, sich auf Neues/ Anderes einzulassen	2	O					0	Grün	nein	Dortmund
Trends hinterfragen, nicht hinterherlaufen	2	B	O				1	Rot	nein	Dortmund
Finanzielle Unabhängigkeit -> freie Zeit in Engagement stecken	2						1	Rot	nein	Dortmund
Als Verbraucher sich mit anderen Verbrauchern austauschen	2	B	E				0	Rot	nein	Dortmund
Nicht hinnehmen, was ich sehe und mir nicht gefällt! Mutig sein, zu handeln, entgegenwirken	2						0	Rot	nein	Dortmund
Kritische Konsumentenhaltung durchschaut Marketingstrategie der „heilen Welt“-Suggestion	2						0	Rot	nein	Dortmund
Körpergefühl verbessern, in sich gehen	2	O					1	Gelb	nein	Kassel-Witzenhausen
Geschmack schulen	2	B					0	Gelb	nein	Kassel-Witzenhausen
Lebensmittelabfälle vermeiden	2						0	Gelb	nein	Kassel-Witzenhausen
Alles kann ich auf einmal sowieso nicht umsetzen, trotzdem will ich mich stetig weiterentwickeln -> regelmäßige Denkanstöße	2						0	Gelb	nein	Kassel-Witzenhausen
Mehr Auseinandersetzung mit dem Thema „Was der Fleischkonsum für Folgen hat“	2	B					0	Gelb	nein	Kassel-Witzenhausen
Oft keine „Kapazität“ für eingehende Beschäftigung -> Nachhaltigkeit muss auf allen Ebenen des Lebens ansetzen	2	Q					0	Gelb	nein	Kassel-Witzenhausen
Zeit für gesundes Essen/ selbst kochen	2	M	Q				0	Gelb	nein	Kassel-Witzenhausen
Noch mehr Wissen anreichern	2	B					0	Gelb	nein	Kassel-Witzenhausen
Prioritäten im eigenen Leben anders setzen	2	O					0	Gelb	nein	Kassel-Witzenhausen
Einfach machen/ umsetzen	2						0	Gelb	nein	Kassel-Witzenhausen
Ist „neu“ immer besser? Kann ich von den Vorfahren evtl. mehr lernen als von allen aktuellen „Expertenmeinungen“ zusammen?	2						1	Orange	nein	Kassel-Witzenhausen
Nur, wenn ich den Ort kenne, wo mein Lebensmittel herkommt, kann ich guten Gewissens essen. -> sich beim Essen immer der Ursprungsort der Lebensmittel bildlich vorstellen!	2	B	C				1	Orange	nein	Kassel-Witzenhausen
In einem wohligen/ harmonischen Umfeld auf das Thema Nachhaltigkeit eingehen (Familien, Feste, Natur, usw.)	2						0	Orange	nein	Kassel-Witzenhausen
Systeme kritisch hinterfragen, neue Lösungswege, Alternative finden	2	B					0	Orange	nein	Kassel-Witzenhausen
Selber Nachdenken/ Handeln ohne sich „höheren Mächten“ zu unterwerfen	2						0	Orange	nein	Kassel-Witzenhausen
Persönlichen Bezug zum Lebensmittel herstellen. -Herstellung /Produktion -Art der Essensaufnahme, z.B. händisch	2						4	Blau	ja	Kassel-Witzenhausen
Freunde zum gemeinsamen Kochen einladen	2	E	M				2	Blau	ja	Kassel-Witzenhausen
Vor dem (Ein-)Kaufen überlegen	2	M	O				0	Blau	nein	Kassel-Witzenhausen
Achtsam essen, schmecken	2	N	O				0	Blau	nein	Kassel-Witzenhausen
Spaß beim Kochen	2	M					0	Blau	nein	Kassel-Witzenhausen
Freude am Essen -> gemeinsam Essen	2	E	N				0	Blau	nein	Kassel-Witzenhausen
Verantwortung übernehmen	2						3	Grün	ja	Kassel-Witzenhausen
Integration von Sport und gesunden Lebensmitteln in den Arbeitsalltag	2						3	Gelb	ja	Hamburg
Mehr Eigenverantwortung übernehmen	2						0	Gelb	nein	Hamburg
Mehr Wissen erlangen	2	B					0	Gelb	nein	Hamburg
Eine Woche/ ein Monat ideale Ernährung praktizieren, ausprobieren	2						0	Gelb	nein	Hamburg
Selber kochen (lernen)	2	B	M				0	Gelb	nein	Hamburg
Selber gärtnern (für ein wenig Selbstversorgung und viel Einblick)	2	G					0	Gelb	nein	Hamburg
Auch mal Anlagen der Massentierhaltung besuchen bzw. den Versuch dokumentieren	2	B					0	Gelb	nein	Hamburg
Höfe besuchen, ganz verschiedene (große, kleine, Bio, Konventionelle)	2	B	G	I			0	Gelb	nein	Hamburg
Lebensmittel selber anbauen (-> Gemeinschaftsgärten, Kitas, Schulen...)	2	B					0	Gelb	nein	Hamburg
Man darf nicht zu hohe Ansprüche haben (-> nicht „perfekt“ sein wollen)	2						0	Gelb	nein	Hamburg
Ich brauche Gleichgesinnte zum Mitmachen (-> Peer)	2	E					0	Gelb	nein	Hamburg
Ich tausche Kochen gegen eine andere Dienstleistung	2	M					0	Gelb	nein	Hamburg
Viel Mehr bewegen, weniger essen	2	N					0	Orange	nein	Hamburg
Zwischen Gerechtigkeit und Massentierhaltung Lücke schließen -> Selber Hühner halten	2						0	Orange	nein	Hamburg
Zwischen Gerechtigkeit und Massentierhaltung Lücke schließen -> Höfe besuchen, immer wieder zumindest versuchen	2	B					0	Orange	nein	Hamburg
Mehr Zeit	2	Q					0	Blau	nein	Hamburg
Hintergründe kennen	2	B					0	Blau	nein	Hamburg
Entwicklung von Umsetzungsstrategien	2						0	Grün	nein	Hamburg
Motivation!	2						0	Grün	nein	Hamburg
Beobachten -> selbstständig denken -> zum selbstständigen Handeln animieren	2	B					0	Grün	nein	Hamburg
Mehr Zeit für persönliche Veränderung	2	Q					2	Gelb	ja	Berlin
Salutogenetische Versorgungsplanung	2						1	Gelb	nein	Berlin
Auswirkungen des eigenen Handelns begreiflich machen	2	O					0	Gelb	nein	Berlin
Gründe für unnachhaltiges Verhalten eliminieren/ reduzieren	2						0	Gelb	nein	Berlin
Partizipation i.S. des Bewusstseins: Ich bin Gestalter/in meines Umfelds/ Lebens = Recht-Nahme	2	O					0	Gelb	nein	Berlin
Problem? Muss letzten Endes durch eigenen Willen entstehen	2						0	Gelb	nein	Berlin
Verantwortung erkennen und umsetzen (Handeln aus starkem Bewusstsein)	2	O					0	Orange	nein	Berlin
Wertschätzung der Nahrung bewusst machen und erhöhen	2	O					1	Blau	ja	Berlin
Am Essen sollte nicht gespart werden. Nahrung/Lebensmittel ≠Geldverschwendung	2	H					1	Blau	nein	Berlin
Rituale schaffen	2	P					1	Blau	nein	Berlin
Regionale Produkte bevorzugen / fördern	2	J					0	Blau	nein	Berlin
Pause machen, tief Durchatmen, sich selbstbewusst fühlen, entschleunigen	2	O	Q				0	Blau	nein	Berlin
Essen (Zubereitung) nicht nur als Verlust von Zeit wahrnehmen lernen!	2	N	Q				0	Blau	nein	Berlin
Kompostierung von Haushaltsabfälle auf dem eigenen Balkon	2						0	Blau	nein	Berlin
Vitalpausen/ Umgestaltung der Pausen -> kleinere Pausen + strikte Pauseneinhaltung	2	Q					0	Blau	nein	Berlin
Psychisch/Mentale Bedürfnisse durch geerdeten Konsum (Eigenarbeit, Nahrung/ Ernährung erarbeiten) befriedigender gestalten	2						0	Blau	nein	Berlin
Persönliche Barrieren bewusst machen -> warum setze ich mein Wissen nicht in die Tat um?	2	O					2	Grün	ja	Berlin
Sich andere Menschen suchen und gemeinsam Handeln	2	E					2	Grün	ja	Berlin
Schaffung von Ritualen	2	P					2	Grün	ja	Berlin
Förderung der Geschmackswahrnehmung	2	B	N	O			2	Rot	ja	Berlin
Mit Salz & Zucker sparsamer und bewusster umgehen!	2	M					1	Rot	nein	Berlin
Vorbild sein	2						1	Gelb	nein	Münster
Auf regionale Produkte/ Lebensmittel zurückgreifen	2	J					1	Gelb	nein	Münster
Meinen Alltag besser planen	2	O					0	Gelb	nein	Münster
Sich nicht mit anderen vergleichen	2						0	Gelb	nein	Münster
Emotionseinkäufe vermeiden	2	L					0	Gelb	nein	Münster
Bewusstsein stärken, dass Entscheidungen Auswirkungen auf Zukunft und gegenwärtige Prozesse haben	2	O					1	Orange	ja	Münster
Achtsam einkaufen mit Blick auf Auswirkungen auf andere	2	L	O				1	Orange	nein	Münster
„Lusteinkäufe“ meiden: Brauche ich es wirklich? Wem schade ich?	2	L					1	Orange	nein	Münster
An meine Mitmenschen denken und diese wertschätzen	2	O					0	Orange	nein	Münster
Eigene Bedürfnisse zurückstellen, auch in Eile	2	O	Q				0	Orange	nein	Münster
Mehr auf die Herkunft der Lebensmittel achten	2	C	O				0	Orange	nein	Münster
Sich selber organisieren	2						1	Blau	nein	Münster
Selbstversorgung	2	G					1	Blau	nein	Münster
Bedarfsgerechter Einkauf	2	L					0	Blau	nein	Münster
Eigene Landwirtschaft/ Bio-Produkte	2	G	I				0	Blau	nein	Münster
Wie kann man Mensch mehr zum selber Kochen animieren?	2	M					0	Blau	nein	Münster
Bedarfsgerechter Konsum (auch an Feiertagen)	2	N					0	Blau	nein	Münster
Sich informieren	2	B					0	Blau	nein	Münster
„Selbstversorger“	2	G					0	Blau	nein	Münster
Wieder/ mehr selber kochen!	2	M					0	Blau	nein	Münster
Ein Vorbild sein	2						2	Grün	ja	Münster
Bewusst und ressourcenschonend konsumieren/ leben	2	L	N	O			11	Grün	ja	Münster
Austausch mit anderen Menschen	2	B	E				1	Grün	nein	Münster
Seine Meinung erklären, vertreten aber nicht aufzwingen! -> Gewalt (Blitzsymbol)	2						0	Grün	nein	Münster
Inneren „Schweinehund“ überwinden!	2						0	Grün	nein	Münster
Medien als Infoplattform nutzen!	2	B	D				0	Grün	nein	Münster
Selbstengagement für nachhaltigeren Lebensstil	2						0	Grün	nein	Münster
Verantwortung/ Bewusstsein was Handeln auslöst!	2	O					0	Grün	nein	Münster
Verantwortungsbewusst handeln	2	O					0	Grün	nein	Münster
Freie Entscheidungen als Individuum treffen können	2						0	Rot	nein	Münster
Ernährung nicht isoliert betrachten	2	B					1	Gelb	ja	Freiburg
Was man liebt, will man schützen	2						0	Gelb	nein	Freiburg
Schaffen von Genuss-/ Erfüllungsalternativen zum Konsum -> Vermeidung von Frustkäufen	2	L					1	Orange	ja	Freiburg
Bei sich selbst anfangen -> eigenes Umfeld ->...	2						4	Orange	ja	Freiburg
Meditation/ innere Ausrichtung stärken -> dadurch Ausstrahlung erhöhen und eigene Kraft stärken	2						1	Orange	nein	Freiburg
Suffizienz Erfahrungen machen. Was brauche ich wirklich? Und was steht hinter welchem Produkt	2	B					0	Orange	nein	Freiburg
Veränderungen brauchen Zeit; neue Handlungsstrategien entstehen nicht von heute auf morgen -> Zeit lassen, kein Zwang	2	Q					0	Orange	nein	Freiburg
Die Rolle der Lebensmittel im Zusammenhang mit unserer Lebensart betrachten	2	B	O				0	Orange	nein	Freiburg
Weniger kaufen = weniger wegwerfen? -> „Müllgrenze“	2	L					0	Orange	nein	Freiburg
Spirituelle Ansätze ausprobieren (über freilassend - nicht manipulativ)	2						0	Orange	nein	Freiburg
Mehr rausgehen (vor allem mit Kindern)	2						0	Orange	nein	Freiburg
Vielfalt entdecken -> Neues wertschätzen	2	B	O				0	Blau	nein	Freiburg
Bewusstsein für „Man ist was man isst“	2	O					0	Grün	nein	Freiburg
Verfügbarkeit schaffen -> im öffentlichen Raum ist es oft unmöglich, nachhaltige Lebensmittel zu bekommen	3	A					1	Gelb	nein	Dortmund
Transparenz schaffen: jeder will seine Produkte verkaufen und stellt sie toll dar -> objektive Bewertungen zu allen Lebensmitteln in verschiedenen Kriterien (Fair Trade, regional, ökologisch…)	3	C	J				0	Gelb	nein	Dortmund
Preise für Lebensmittel müssen die Vollkosten abbilden	3	H					5	Orange	ja	Dortmund
Gemeinschaft: Wenn viele an einem Ziel arbeiten fällt es leichter -> Viele gärtnern zusammen, einer holt Lebensmittel für viele, anstatt dass jeder selbst losfahren muss.	3	E	L				1	Orange	nein	Dortmund
„Ökopunkte“ auf den Produkten, je nach ökologischer Qualität	3	D					0	Orange	nein	Dortmund
Förderung nachhaltiger Gastronomie	3	A					3	Blau	ja	Dortmund
Obstkörbe für die Mitarbeiter durch Firma bereitstellen	3	A					1	Blau	nein	Dortmund
Gesundes, nachhaltiges „Fastfood“	3	A					1	Blau	nein	Dortmund
Gemeinsames Kochen in z.B. Hostels	3	E	M				1	Blau	nein	Dortmund
Apps oder Internetseite über Saisonprodukte	3	B	K				1	Blau	nein	Dortmund
Essbare Bäume in Parks	3	R					1	Blau	nein	Dortmund
Kantine umstrukturieren, Essen bestellen: frische nachhaltige Caterer statt der Stamm-Pizzeria, Gemeinsames Essen organisieren: jeder bringt 1x die Woche etwas Frisches mit	3	A					1	Blau	nein	Dortmund
Fertig gepackte Selbstversorgungsrucksäcke anbieten (als Supermarkt in Ausflugsregionen)	3	A	J				0	Blau	nein	Dortmund
Durch Info-Zettel an den Produkten Verbraucher über den Produktionsvorgang informieren	3	B	C				1	Grün	nein	Dortmund
Marktstand eines regionalen Anbieters im Wohnviertel	3	A	J	R			3	Rot	ja	Dortmund
Wochenmärkte fördern und umgestalten, z.B. Feierabendmärkte	3	A					2	Rot	ja	Dortmund
Steuern auf „ungesunde“, nicht ökologische Nahrungsmittel	3	F					4	Rot	ja	Dortmund
Positive Aspekte von Werbestrategien für nachhaltige Produkte nutzen	3	D					1	Rot	nein	Dortmund
Ladenkonzept: Bioprodukte direkt neben konventionellen Produkten stellen = direkter Vergleich möglich	3	A	I				1	Rot	nein	Dortmund
Niedrigere Preise für nachhaltige Produkte durch Fördermittel	3	F	H				2	Rot	nein	Dortmund
Umfangreiche Informationen zu ökologischen und ökonomischen Qualitäten der jeweiligen Produkte	3	B	C				0	Rot	nein	Dortmund
Höhere Produktpreise für konventionelle Produkte	3	H					0	Rot	nein	Dortmund
Ehrliche Werbung mit konstruktiven Argumenten zur Umweltqualität der Produkte	3	D					0	Rot	nein	Dortmund
Mehr Möglichkeiten um unterwegs (schnell) gesund und nachhaltig zu essen	3	A					1	Gelb	ja	Kassel-Witzenhausen
Realer Preis für Nahrung -> für Fleisch	3	H					2	Gelb	ja	Kassel-Witzenhausen
Strukturen für Verpackungsfreien Einkauf stärken	3	A	S				1	Gelb	ja	Kassel-Witzenhausen
Gesunde Ernährung muss in öffentlichen Mensen/ Kantinen wichtiger als Preis sein	3	A	H				1	Gelb	nein	Kassel-Witzenhausen
Angemessene Preise für Lebensmittel -> keine Dumpingpreise mehr	3	H					1	Gelb	nein	Kassel-Witzenhausen
Mehr Biorestaurants	3	A	I				0	Gelb	nein	Kassel-Witzenhausen
Mensa auf Bio und vegetarisch umstellen	3	A	I				0	Gelb	nein	Kassel-Witzenhausen
Kochen lernen in der Schule/ Kindergarten	3	B	M				0	Gelb	nein	Kassel-Witzenhausen
Angebotsverknappung -> Rationierung von tierischen Lebensmitteln	3	A					0	Gelb	nein	Kassel-Witzenhausen
Größere Bioauswahl in Supermärkten	3	A	I				0	Gelb	nein	Kassel-Witzenhausen
Bezahl 2 Kauf 3 Aktionen umwandeln in Kauf 2 Bio, bekomme 1 eine Woche später	3	D	I				0	Gelb	nein	Kassel-Witzenhausen
Restaurants: Lebensmittel/ Gerichte am Ende des Tages kostenlos abgeben an Verbraucher	3	A					0	Gelb	nein	Kassel-Witzenhausen
Mehr Biorestaurants in Städten	3	A	I	R			0	Gelb	nein	Kassel-Witzenhausen
In Städten als Willkommensgeschenk für Neuankömmlinge, z.B. 1 Monat Bio-Kiste frei Haus	3	A	I	R			0	Gelb	nein	Kassel-Witzenhausen
Ernährungsampel für Tierwohl/ Natur/ Gesundheit auf Packungen	3	B	C	S			0	Gelb	nein	Kassel-Witzenhausen
Punkte/ Prämiensystem in Supermärkten für Kauf von Bioprodukten	3	D	I				0	Gelb	nein	Kassel-Witzenhausen
Mehr Aufklärung über die Herkunft der Lebensmittel	3	B	C				0	Gelb	nein	Kassel-Witzenhausen
Kochkurse mit Schwerpunkt Regionalität und Saisonalität in der Schule	3	J	K	M			0	Gelb	nein	Kassel-Witzenhausen
Durch massive Besteuerung nicht-nachhaltig erzeugter Produkte	3	F					0	Gelb	nein	Kassel-Witzenhausen
Erziehungsregeln bei Kindern darauf anpassen. „Nachhaltige Ernährung“ als Schulfach, ökologische Höfe für Klassenfahrten, Verbannung von Zucker und tierischen Produkten aus der Ernährung -> hin zu pflanzlicher Kost	3	B					0	Gelb	nein	Kassel-Witzenhausen
Aufklärung: Trailer/ Kurzfilm über nachhaltige und gesunde Ernährung vor Hauptfilmen in öffentliche Kinos	3	B	D				0	Gelb	nein	Kassel-Witzenhausen
Lebensmittel in sich selbst verpacken z.B. Tomaten in „Grünabfällen“, die kompostierbar sind	3	S					3	Orange	ja	Kassel-Witzenhausen
Durch lose Waren (Unverpacktläden) bedarfsgerechten Einkauf ermöglichen und so Lebensmittelverschwendung eindämmen (Vorteilspackungen für Frischprodukte verleiten zu unsinnigem Einkauf)	3	A	L	S			2	Orange	ja	Kassel-Witzenhausen
Bildung (was Ernährung/ Nachhaltigkeit, etc.) angeht in Schulen, Kitas, Arbeitsämtern, Universitäten, VHS...	3	B					4	Orange	ja	Kassel-Witzenhausen
Persönlicherer Bezug zum Essen kann nur funktionieren, wenn ich vom Produzenten eine Story mitgeliefert kriege	3	B	C	D	G		0	Orange	nein	Kassel-Witzenhausen
„Alte Küche“ als tierische Produkte Luxus waren, ebenso wie exotische Produkte, wiederaufleben lassen	3	P					0	Orange	nein	Kassel-Witzenhausen
Gemeinschaften fördern -> gemeinsames Kochen/ Kochkurse/ Kräuterspaziergänge/ Obst in der Stadt Spaziergänge	3	E	M	R			0	Orange	nein	Kassel-Witzenhausen
Umstellung großer Unternehmen auf Bio z.B. DB -> Essen/ Getränke im Zug/ Fluggesellschaften	3	A	I				2	Blau	ja	Kassel-Witzenhausen
Imbissbuden mit mehr pflanzlich/ saisonal/ regionalen Angeboten	3	A	J	K			4	Blau	ja	Kassel-Witzenhausen
Transparenz bei regionaler Erzeugung (wo fanden einzelne Schritte der Produktionskette statt?) -> Ferkel -> Mast -> Schlachtung (Welcher Schritt definiert Regionalität?)	3	C	G	J			1	Blau	nein	Kassel-Witzenhausen
Bio-kette (Fast Food) mit verantwortungsvollen Werten und Firmenphilosophie	3	A	I				0	Blau	nein	Kassel-Witzenhausen
Bio Fastfood aus der Region	3	A	I	J			0	Blau	nein	Kassel-Witzenhausen
Nachhaltigere Außerhausverpflegung (weg von schwerer tierischer Kost - hin zu leichter pflanzlicher Kost)	3	A					0	Blau	nein	Kassel-Witzenhausen
Nachhaltige Verpackung für bio-convenience Produkte	3	I	S				0	Blau	nein	Kassel-Witzenhausen
Neue pädagogische Konzepte z.B. vegetarisches Essen/ Bio- Fleisch in Schulen, Mensen, Kantinen -> Schaukochen in Fußgängerzonen, Bildung in Schulen, Kindergärten, Kitas	3	A	B	I	M		3	Grün	ja	Kassel-Witzenhausen
Ältere Schüler erzählen auf interaktive Weise, jüngeren Schülern über Ernährung/ Auswirkung und Werte -> so lernen beide Schülergruppen über Werte bezogen auf Ernährung anstatt von außen einen langweiligen Vortrag zu hören	3	B					2	Grün	ja	Kassel-Witzenhausen
Ernährungschallenges: Miteinander und Gegeneinander mit Belohnung bei Erreichen der nächsten Stufe -> z.B. Kaufe Biogemüse, was du noch nie gekauft hast und bekoche den anderen mit einem leckeren Rezept	3	E	I	L	M		0	Grün	nein	Kassel-Witzenhausen
Subventionierung von pflanzlichen Lebensmitteln: Erzeuger -> Saatgut, Verbraucher -> Endprodukt	3	F					2	Rot	ja	Kassel-Witzenhausen
Promis als Werbeträger für nachhaltige Ernährung (Vorbilder)	3	D					3	Rot	ja	Kassel-Witzenhausen
Bei Tierprodukten Herkunft der Tiere und des Futters transparent darstellen	3	C					1	Rot	ja	Kassel-Witzenhausen
Höherer Steuersatz für Tierisches und Ungesundes. Niedrigere für pflanzliche und gesunde Lebensmittel	3	F					5	Rot	ja	Kassel-Witzenhausen
Gesunde Lebensmittel leicht verfügbar machen durch Schul-/ Kindergartenspeisen, Mensen, Kantinen, Catering, Krankenhäuser…	3	A					1	Rot	ja	Kassel-Witzenhausen
Positiv belegen von gesunder Esskultur -> über Trend	3	D	P				0	Rot	nein	Kassel-Witzenhausen
Ein „Haus der Region“ mit Café, Kuchen, Shop, Bäckerei, Metzgerei, Rösterei, wo man sich treffen und kochen lernen kann, bzw. Lebensmittel herstellen	3	A	E	J			2	Gelb	ja	Hamburg
Stadt als Akteur gewinnen! Ansätze (Bio, Vegan, Regional) in Mensen, Förderung von Regionalität und neuen innovativen Ideen!	3	A	I	J	R		2	Gelb	ja	Hamburg
Fleisch und Milchprodukte verteuern	3	H					2	Gelb	ja	Hamburg
Belohnungssysteme für nachhaltige Ernährung schaffen	3						5	Gelb	ja	Hamburg
In jeden Stadtteil einen Gemüsegarten für alle (Allmende)	3	E	R				2	Gelb	ja	Hamburg
Essbare Stadt: freies Obst, Nüsse, Gemüse für alle ( die Verwaltung gibt ihr okay)	3	E	R				0	Gelb	nein	Hamburg
Eine eigene Geldwährung nur für Bio (Produkt-Kochen-Gärtnern)	3	I					0	Gelb	nein	Hamburg
Ein Bio-Social-Club wo Wissen und Waren geteilt werden	3	E	I				0	Gelb	nein	Hamburg
Menschen zeigen, dass nachhaltige Ernährung mit einem kleinen Budget zu verbinden ist!	3	B	H				0	Gelb	nein	Hamburg
Problem: Menschen verbinden mit Ernährungsumstellung Verzicht; Lösung: Den Begriff „Verzicht“ vermeiden!	3						0	Gelb	nein	Hamburg
Finanzielle Unterstützung für sehr nachhaltige Ernährungsformen	3	F					0	Gelb	nein	Hamburg
Problem: desinteressierte Jugend; Lösung: Jugend nachhaltige Ernährung nahebringen -> sie sind die Zukunft!	3	B					0	Gelb	nein	Hamburg
Fastfood-Ketten (McDonald´s und Co.) abschaffen oder zumindest Filialen einschränken, stattdessen gesunde und nachhaltige Einzelhandel (z.B. Salatbars)	3	A	F				0	Gelb	nein	Hamburg
Mehr Veranstaltungen über alternative Ernährungsformen, z.B. wie veganes Straßenfest	3	D					0	Gelb	nein	Hamburg
Kochen und essen als Genuss und Hobby für Freizeit interessant machen, gemeinsam kochen...	3	E	M	N			0	Gelb	nein	Hamburg
Eine Produktdatenbank, die die wahren Kosten (Ressourcenverbrauch etc.) einpreist (z.B. Wurst Aldi 0,69€ -> Erdwahre Kosten 2,69 €)	3	B	C	H			6	Orange	ja	Hamburg
Solidarische Landwirtschaft bekannter machen -> mehr Hofläden	3	A	D	E	G		1	Orange	nein	Hamburg
Apps für Information über Nachhaltigkeit beim Einkauf	3	D	L				0	Orange	nein	Hamburg
Kampagnen entwickeln die verdeutlichen das ein anderer Umgang mit Ernährung mir selbst und anderen zugutekommt	3	D					0	Orange	nein	Hamburg
Essbare Stadtkonzepte realisieren	3	R					2	Blau	ja	Hamburg
Gläserne Küche in Bio Fast Food-Küchen (alles wird offengelegt, auch Löhne)	3	A					0	Blau	nein	Hamburg
„Solidarprojekte“ -> Lokalgruppen zum gemeinsamen Handeln, Kinder- und Jugendgruppen -> über nachhaltige Ernährung lehren und animieren etwas zu tun	3	B	E				0	Grün	nein	Hamburg
Lebensmittelpreise müssen die Gesamtkosten darstellen	3	H					6	Rot	ja	Hamburg
Selber Kochen fördern	3	M					0	Rot	nein	Hamburg
Fast-Food-Ketten stoppen!	3	A	F				0	Rot	nein	Hamburg
Bio kann in regionaler Vernetzung die jeweilige Bevölkerung ernähren	3	I	J				0	Rot	nein	Hamburg
Schockierende Bilder aus Massentierhaltung zeigen – Realität abbilden	3	B	C	D			0	Rot	nein	Hamburg
Leicht verständliche nährwertangaben -> Ampel	3	B					0	Rot	nein	Hamburg
Kampagnen an Schulen/ in Kitas für Bio und nachhaltige Ernährung	3	D	I				0	Rot	nein	Hamburg
Ungesunde Lebensmittel vom Markt nehmen	3	A	F				0	Rot	nein	Hamburg
Schon in Schulen etc. durch Kurse (Kochen usw.) eine nachhaltige Ernährung aufzeigen	3	B	M				2	Gelb	ja	Berlin
Koch- & Ernährungskurse an Schulen (langfristig -> Routine & Begeisterung für Kochen)	3	B	M				2	Gelb	ja	Berlin
Warnung vor nicht nachhaltigen Produkten (Warndreieck Nicht BIO!!!)	3	I					1	Gelb	nein	Berlin
Bepreisung von Lebensmitteln angleichen (Fleisch ist konventionell zu billig; Wissen über „Lebens“mittel geht verloren)	3	H					1	Gelb	nein	Berlin
Bio- Döner-Läden öffnen	3	A	I				0	Gelb	nein	Berlin
Schockbilder von Massentierhaltung auf entsprechenden Produkten	3	B	C	D			0	Gelb	nein	Berlin
Bio-Kochkurse in Schulen für Kinder (& Eltern?!)	3	B	I	M			0	Gelb	nein	Berlin
Frühe Gewöhnung an ausgewogene Ernährung	3	B					0	Gelb	nein	Berlin
Kantinen etc. mit nachhaltiger Ernährung ausstatten	3	A					0	Gelb	nein	Berlin
Kosten senken (wie auch immer) für Bio-Produkte	3	H	I				0	Gelb	nein	Berlin
Preisfragen: gesundes Essen für alle erschwinglich	3	H					0	Gelb	nein	Berlin
Bio-Kurse veranstaltet durch die Krankenkasse (Bonusprogramm)	3	B	I				0	Gelb	nein	Berlin
In der Stadt Lebensmittel „verdörflichen“ -> weniger Supermarkt mehr Händler des Vertrauens aus der Umgebung	3	A	J	R			0	Gelb	nein	Berlin
Ausschluss(zonen) von (Quellen) ungesunder Nahrung	3						0	Gelb	nein	Berlin
Verbot von Fake-Foods („E-Nummer Produkte“)	3	F					0	Gelb	nein	Berlin
Gesetzliche Umgestaltung der Ernährungsversorgung im Sinne der Menschenrechte (Zugang, Gleichheit, Gleichwertigkeit, Ausbeutung stoppen,…); Asoziale Marktwirtschaft in die Schranken weisen	3	F					3	Orange	ja	Berlin
Nachhaltige Ernährung als gesellschaftliche Norm einführen z.B. in Filmen o.ä. thematisieren	3	D	E				0	Orange	nein	Berlin
Bio-Diät als Weg zum Top-Body vermarkten	3	D	I				0	Orange	nein	Berlin
Mehr Slow-Food Angebot	3	A					0	Blau	nein	Berlin
Gesündere Kantinen: -lokale Anbieter -nur nachhaltige Produkte	3	A	J				0	Blau	nein	Berlin
Handeln positiv verstärken durch Vorteile für Bio-Ernährung (Preis, gesellschaftliche Vorteile, Krankenkassen günstiger, Steuervorteile USt)	3	H	I				1	Grün	ja	Berlin
Kuschelgruppen einführen, die dich nur mitkuscheln lassen, wen du dich Bio ernährst	3	E	I				1	Grün	nein	Berlin
Gewünschtes bestärken, Unerwünschtes ungefördert lassen (Boni – z.B. weniger Steuern für nachhaltige und gesunde Lebensmittel / Sanktionen – z.B. höhere Steuern auf ungesunde umweltbelastende Lebensmittel)	3	F					0	Grün	nein	Berlin
Realpreise für konventionell erzeugte Nahrung nehmen	3	H					1	Rot	ja	Berlin
Früherer Start der Ernährungslehre, damit richtige Ernährung selbstverständlich wird, z.B. durch Medien	3	B	D				1	Rot	ja	Berlin
Plattform für Landwirte anbieten, um saisonale und regionale Produkte zu fairen Preisen an die Konsumenten zu bringen, z.B. durch Märkte	3	A	G	J	K		2	Rot	ja	Berlin
Gesetzliche Regelung: Pflicht zur Kennzeichnung von Nahrung bzgl. Produktionsweise / Herkunftsweg	3	C	F				2	Rot	ja	Berlin
Informationen zur Herkunft/ Produktion etc. von Nahrung bereitstellen	3	B	C				0	Rot	nein	Berlin
Offensiv werbende Bio-Super-Frischfood- Kette macht an allen Autobahnraststätten etc. auf	3	A	D	I			0	Rot	nein	Berlin
Gemüse/ Obst als Standardlebensmittel (wieder) etablieren	3						0	Rot	nein	Berlin
Studien zur gesunden Ernährung & deren positiver Wirkung fördern und veröffentlichen	3	B	D				0	Rot	nein	Berlin
Angebote von konventionellen Produkten in Supermärkten minimieren/ besonders kennzeichnen	3	A	F				0	Rot	nein	Berlin
Förderung und Unterstützung für regionalen Bio-Anbau vom Saatgut bis Ladenfläche	3	F	G	I	J		0	Rot	nein	Berlin
Preise angleichen, so dass „Wert“ bezahlt wird -> Bsp. Fleischpreis in „konventioneller“ Haltung anziehen	3	H					0	Rot	nein	Berlin
Werbung stärker zu Gunsten von BIO/ Nachhaltigkeit machen & fördern	3	D	I				0	Rot	nein	Berlin
Vorleben von Bio-Konsum in den Medien/ durch Institutionen, vielleicht durch Regierung -> es muss selbstverständlich sein	3	D	F	I			2	Gelb	ja	Münster
Mehr Bio-Angebote in Supermärkte mit akzeptablen Preisen	3	A	H	I			2	Gelb	nein	Münster
Im Supermarkt Kisten zusammenstellen mit unterschiedlichen nachhaltigen Produkten. Um darauf aufmerksam zu machen	3	A	D				0	Gelb	nein	Münster
Mehr Direktkooperationen mit Biobauernhöfen und Verbrauchern	3	A	E	G	I		0	Gelb	nein	Münster
Mehr unverpackte LM anbieten (bes. Gemüse)	3	A	S				0	Gelb	nein	Münster
Kennzeichnung regionaler Produkte im Supermarkt	3	C	J				0	Gelb	nein	Münster
In jedem Supermarkt nur Bio	3	A	I				0	Gelb	nein	Münster
Verbrauchern die Folgen vom konventionellen Essen vor Augen führen	3	B					0	Gelb	nein	Münster
Mehr Bio-Vielfalt in Supermärkten	3	A	I				0	Gelb	nein	Münster
Mehr Bio anbieten	3	A	I				0	Gelb	nein	Münster
Bio-Produkte im Supermarkt besser präsentieren!	3	D	I				0	Gelb	nein	Münster
Aufklären, warum Bio „teurer“ ist!	3	B	H	I			0	Gelb	nein	Münster
Bio braucht ein anderes Image (zurzeit Öko und Hipster)	3	D	I				0	Gelb	nein	Münster
Bessere Verteilung der z.B. Bio-Märkte	3	A	I				0	Gelb	nein	Münster
Versteuerte Verfügbarkeit z.B. auf dem Dorf mehr Einkaufsmöglichkeiten bieten, Bauern können Aushang machen	3	A	G				0	Gelb	nein	Münster
Günstigerer Preis von Bio-Lebensmitteln	3	H	I				0	Gelb	nein	Münster
Attraktivität der Bio-Produkte steigern	3	D	I				0	Gelb	nein	Münster
Tierische Lebensmittel müssen mehr kosten	3	H					0	Orange	nein	Münster
Wird gesunde/ nachhaltige Ernährung leichter zugänglich/ einfacher durch das Internet (z.B. online- Bestellung)	3	A					0	Orange	nein	Münster
Mehr verpackungsfreie Lebensmittelläden	3	A	S				8	Blau	ja	Münster
Arbeitnehmer fördern gesunde Ernährung (Rabatt)	3	H					1	Blau	nein	Münster
Bio überall zu finden	3	A	I				1	Blau	nein	Münster
Lieferdienst Alternativen schaffen; Bio/ Saisonal/ Regional	3	A	I	J	K		0	Blau	nein	Münster
Sehr niedrige Preise für Bio-LM -> Subventionen vom Staat	3	F	H	I			3	Rot	ja	Münster
Gesunde Lebensmittel günstiger anbieten	3	H					1	Rot	nein	Münster
Verbraucher aufklären -> Bedeutung von nachhaltigen Lebensmitteln	3	B					1	Rot	nein	Münster
Werbung und Aufklärung und Infos über „richtige, gesunde“ Ernährung	3	B	D				0	Rot	nein	Münster
Küchen auf der Arbeit anbieten -> so kann in der Pause auch gesund gegessen werden	3	M	N				0	Rot	nein	Münster
Gute transparente Bio-Siegel	3	C	I				0	Rot	nein	Münster
Bio muss günstiger werden!	3	H	I				0	Rot	nein	Münster
Gesunde Ernährung vergünstigen	3	H					0	Rot	nein	Münster
Nachhaltige Lebensmittel im Sonderangebot	3	A	D				0	Rot	nein	Münster
Eigenes Unterrichtsfach an Schulen „Nachhaltige Ernährung“	3	B					2	Gelb	ja	Freiburg
Allgemeinwissen und Erfahrungen über Lebensmittel schaffen in Schulen, Küchen, Gesundheitszentren, Land und Stadt, z.B. Ernährungsbildung als „muss“	3	B					3	Gelb	ja	Freiburg
Ernährungsversorgung anders organisieren als über Supermarkt, z.B. über Food Coops	3	A	E				1	Gelb	ja	Freiburg
Label für konventionelle Produkte, Bioprodukte als Standard	3	I					0	Gelb	nein	Freiburg
„Nachhaltiges“ Kochen mehr in den Alltag bringen (Kochbücher, -kurse, …)	3	M					0	Gelb	nein	Freiburg
Alltagstauglichkeit von nachhaltigem Konsum/ Ernährung -> Kochkurse, etc.	3	M					0	Gelb	nein	Freiburg
Nachhaltige Ernährung muss Trend/ cool/ hip werden	3	D					0	Gelb	nein	Freiburg
Mehr nachhaltiges Angebot in konventionellen Supermärkten	3	A					0	Gelb	nein	Freiburg
Besteuerung von nicht-nachhaltigen Produkten (Preiswandel, Erschwinglichkeit von Bio- Produkten)	3	F	H	I			0	Gelb	nein	Freiburg
Bildung für Nachhaltige Ernährungsformen (Schule, außerschulisch, …)	3	B					0	Gelb	nein	Freiburg
Plattformen schaffen für Austausch (auch interkulturell) „Wie gestalte ich meine Ernährung“	3	B	E	P			0	Blau	nein	Freiburg
Infrastruktur für Nachhaltige Strategien schaffen (z.B. für Nachbarschaftskooperation) Rechtliche Vereinfachungen z.B. für (Food)Sharingpoints; Einkaufsgemeinschaften, Stelle/ Arbeitsplatz schaffen, der die Infrastruktur pflegt, Arbeiten ausführt	3	E	F				5	Grün	ja	Freiburg
Zugang für alle zu qualitativ hochwertigen Lebensmitteln -> Auswahl/ Optionen/ Wahlfreiheit	3	A					1	Rot	nein	Freiburg
Bewusstsein für gesunde und nachhaltige Ernährung stärken -> Ernährungsbildung, Wertewandel, mehr Zeit für Nahrung	3	B	O				0	Rot	nein	Freiburg
Der Bevölkerung finanzielle Mittel für nachhaltige Lebensmittel zur Verfügung stellen	3	F					0	Rot	nein	Freiburg
Solidarwirtschaft fördern, so dass keiner gezwungen ist bei anständigem Lohn, bei Discountern/ Konzernen zu kaufen (die nicht solidarisch entlohnen)	4	E	F				2	Gelb	ja	Dortmund
Wirtschaft stärker in Verantwortung ziehen (Anreize, Sanktionen)	4	F					2	Gelb	ja	Dortmund
Kennzeichnungspflichten (lokal, bio, vegan, saisonal)	4	C	F	I	J	K	3	Gelb	ja	Dortmund
„Früh“- Aufklärung -> in Bildungssystemen (Kitas, Schulen, ...)	4	B					4	Gelb	ja	Dortmund
Peer-Groups bilden -> gemeinsames Einkaufen & Kochen	4	E	L	M			3	Gelb	ja	Dortmund
Anreize schaffen z.B. Nachhaltigkeitspunkte	4						1	Gelb	nein	Dortmund
Zu landwirtschaftlichen Erfahrungen einladen	4	B	G				1	Gelb	nein	Dortmund
„Berührungspunkte“ schaffen	4						1	Gelb	nein	Dortmund
Zu nachhaltigen Produkten spannende Geschichten erzählen	4	B	D				1	Gelb	nein	Dortmund
Gruppenkochen	4	E	M				1	Gelb	nein	Dortmund
Selbstbestimmung/ Selbstorganisation fördern	4						1	Gelb	nein	Dortmund
Gemeinschaftsgärten	4	E	G				1	Gelb	nein	Dortmund
Best Practice veröffentlichen	4	B					0	Gelb	nein	Dortmund
Info- App	4	B	D				0	Gelb	nein	Dortmund
„Stolperpunkte“ -> Erinnerer, sich bewusst zu werden	4						0	Gelb	nein	Dortmund
Finanzielle Möglichkeiten: würden die Konsequenzen aus konventioneller Landwirtschat in den Preis innbegriffen, wäre Bio nicht teurer. Essen muss den Menschen dieser Preis wert sein -> lieber Verzicht auf andere Dinge	4	H	I	O			0	Gelb	nein	Dortmund
Betriebskantine -> Workshop	4	B					0	Gelb	nein	Dortmund
Attraktive Alternativen	4	A					0	Gelb	nein	Dortmund
Konsequenzen des Konsums aufzeigen -> was wird passieren, wenn ich so weitermache? Ökologisch, ökonomisch, sozial	4	B	C				0	Gelb	nein	Dortmund
Säkulare Gemeindehäuser aufbauen -> leere Kirchen nutzen	4						0	Gelb	nein	Dortmund
Wege zu den Produkten	4	C					0	Gelb	nein	Dortmund
Hühnerhaltung in den Innenhöfen	4	G					0	Gelb	nein	Dortmund
Hinterhofgärten statt Rasenfläche	4	G					0	Gelb	nein	Dortmund
Wissen leicht und klar zugänglich machen	4	B					0	Gelb	nein	Dortmund
Infoveranstaltungen in Bioländern	4	B	I				0	Gelb	nein	Dortmund
Wirtschaftsförderung für Kleinst-/ kleine Unternehmen statt für mittlere/ große Konzerne, so dass Kunden die Auswahl haben	4	A	F				0	Gelb	nein	Dortmund
Konfrontation	4						0	Gelb	nein	Dortmund
Bienenhaltung am Balkon fördern	4	G					0	Gelb	nein	Dortmund
Hilfestellung geben: Wo kann ich anfangen?	4	B	E				0	Gelb	nein	Dortmund
Interessante Spitzenprodukte, die presserelevant sind	4	D					0	Gelb	nein	Dortmund
Food Sharing	4	A	E				0	Gelb	nein	Dortmund
Konfrontation; jeder muss früh informiert werden	4	B					0	Gelb	nein	Dortmund
Balkonbepflanzung fördern mittels Workshops	4						0	Gelb	nein	Dortmund
Netzwerke mit unterschiedlichen Akteuren zum Thema aufbauen, in denen es keine zentrale Moderation/ Hierarchie gibt	4	B	E				0	Gelb	nein	Dortmund
Gelder erhöhen um Projekt nach dem Bottom-up Prinzip zu fördern -> stärkere Lobby schaffen	4	F					0	Gelb	nein	Dortmund
Schulgärten -> essbare Alleen	4	A	B				0	Gelb	nein	Dortmund
„Wünschenswertes Handeln“ spielerisch erlebbar machen (als Theaterstück aufführen, Videoclip via YouTube streamen)	4	B	D				0	Gelb	nein	Dortmund
Urbans Gärtnern auf Freifläche erlauben	4	F	G	R			0	Gelb	nein	Dortmund
Durch Informationen zum Handeln anregen	4	B					0	Gelb	nein	Dortmund
Akzeptanz schaffen -> damit man nicht als „Gutmensch“ bezeichnet wird (abwertend)	4						0	Gelb	nein	Dortmund
Anregungen, Motivation und keine Belehrung mehr	4	B	D				0	Gelb	nein	Dortmund
Angebote zentral bekannt machen (clearing house); Neue Angebote gemeinsam entwickeln	4	A	D				0	Gelb	nein	Dortmund
Niedrigschwellige Angebote	4						0	Gelb	nein	Dortmund
Sinnliches Erleben kultivieren	4	O	P				0	Gelb	nein	Dortmund
Orte, wo Mensch die Produkte bekommen kann, bekannter machen	4	A	D				0	Gelb	nein	Dortmund
Gemeinschaftsküchen	4	E	K				0	Gelb	nein	Dortmund
Gemeinsame Kochabende mit interdisziplinärem Teilnehmerkreis	4	E	K				0	Gelb	nein	Dortmund
Niedrigschwellige Aufklärung (z.B. Anzeigen/ Plakate)	4	B	D				0	Gelb	nein	Dortmund
Flashmobs	4	D	E				0	Gelb	nein	Dortmund
Verbot/ Besteuerung nicht-nachhaltiger Produkte	4	F					0	Gelb	nein	Dortmund
Klare Angaben auf den Produkten, welche Zutaten woher kommen	4	C					2	Orange	ja	Dortmund
Schule : Fach Nachhaltigkeit	4	B					3	Orange	ja	Dortmund
Umweltbildung: Stadtteilzentren aufbauen – Infrastruktur zu Verfügung stellen	4	B	R				2	Orange	ja	Dortmund
Man muss Konsequenzen erfahrbar machen	4						3	Orange	ja	Dortmund
Wertschätzung für Lebensmittel stärken	4	B	D	O			3	Orange	ja	Dortmund
Umweltbildung als Schulfach	4	B					3	Orange	ja	Dortmund
Frühe Aufklärung	4	B					1	Orange	nein	Dortmund
Gemeinsam eine Basis schaffen, die aufklärt	4	B	E				1	Orange	nein	Dortmund
Transparenz schaffen (Was läuft gut? Was läuft schlecht?), so dass man auch entsprechend achten/ handeln kann	4	C					1	Orange	nein	Dortmund
Jeder wird angeleitet (in Schule, Kita, Uni, Unternehmen...), eine solche Vision zu entwickeln (Vorteile: es wird sichtbar wer wofür steht und man kann sich zusammenschließen)	4	B					2	Orange	nein	Dortmund
Bildung -> Praxis (spüren, schnibbeln, riechen, kochen, gemeinsam essen und reden, einkaufen)	4	B	E	M	N		2	Orange	nein	Dortmund
Die Kraft der Gemeinschaft nutzbar machen	4	E					1	Orange	nein	Dortmund
Kultur des Bewusstseins der Reflektion fördern (Hinterfragen, Diskutieren, Lösen/ Handeln)	4	O	P				0	Orange	nein	Dortmund
Ein einzelner Vorschlag an der richtigen Stelle kann schon Großes bewegen	4						0	Orange	nein	Dortmund
Schlachthofbesichtigung	4	B					0	Orange	nein	Dortmund
Ernährungsfragen verbrauchen Zeit, die unser Wirtschaftssystem zu einer knappen Ressource macht -> Entfremdung	4	Q					0	Orange	nein	Dortmund
Soziale Marktwirtschaft -> mehr staatlicher Eingriff	4	F					0	Orange	nein	Dortmund
Global denken: Bio-Kartoffeln aus Ägypten in Deutschland unnütz -> allen Menschen ein nachhaltiges Leben ermöglichen	4	A	I				0	Orange	nein	Dortmund
Verflechtungen, Abhängigkeiten darstellen (z.B. systems dynamics)	4	B	C				0	Orange	nein	Dortmund
Bewusstsein für die Einfachheit des Wohlfühlens schaffen	4	O					0	Orange	nein	Dortmund
Die Grenzen der Technik aufzeigen (Natur muss gepflegt, nicht beherrscht werden)	4	B					0	Orange	nein	Dortmund
Bewusstsein schaffen, dass die Natur regional und saisonal das Wichtigste bereitstellt	4	B	J	K	O		0	Orange	nein	Dortmund
Projekt: Schreib/ Zeig auf, was du isst: „Zeig, wer du bist“	4						0	Orange	nein	Dortmund
Wissensvermittlungen von biologischen Zusammenhängen/ Kreisläufen	4	B					0	Orange	nein	Dortmund
Kreislaufwirtschaft, perfekte Nachhaltigkeit, geben und nehmen im Einklang, perfekte Nachhaltigkeit ist Utopie und schwer zu erreichen	4						0	Orange	nein	Dortmund
Gemeinschaft	4	E					0	Orange	nein	Dortmund
Konfrontation, Aufklärung	4	B					0	Orange	nein	Dortmund
Nachhaltigkeitspartys analog „Tupperware“	4	D					5	Blau	ja	Dortmund
Zugängliche Dachgärten (essbare Stadt, urbanes Gärtnern)	4	G	R				1	Blau	ja	Dortmund
Eltern sind Vorbilder!	4	E					2	Blau	ja	Dortmund
Mundraubtouren – Bezug zu regionalen und saisonalen Produkten	4	E	J	K			2	Blau	ja	Dortmund
Flächen für urbanes Gärtnern	4	G	R				3	Blau	ja	Dortmund
Schulungen des Kantinenpersonals und Gesundheitsmanagement	4	B					1	Blau	nein	Dortmund
Küchen für Spontannutzung zu Verfügung stellen	4	E	M				1	Blau	nein	Dortmund
Menschen animieren: bewusst essen muss als etwas Schönes empfunden werden z.B. durch gemeinsame Art Feste: essen nicht nebenbei, sondern zelebrieren (Problem: Ist das für alle möglich?)	4	N	O				1	Blau	nein	Dortmund
Raststätten/ Ruheräume in der Stadt schaffen	4	R					0	Blau	nein	Dortmund
Noch mehr Kommunikation (Social Media -> Bsp. foodsharing)	4	B	D				0	Blau	nein	Dortmund
Kochbücher, die alle diese nachhaltigen Rezepte/ Aspekte beinhalten	4	B	M				0	Blau	nein	Dortmund
Wenn Fleisch gekauft wird zum Beispiel darauf aufmerksam machen, womit Schweine/ Hühner/ etc. gefüttert werden, oder mit wie viel Wasser Getreide gegossen wird	4	C					0	Blau	nein	Dortmund
Firmen und alternative Caterer zusammenbringen	4	E					0	Blau	nein	Dortmund
Keine Verbote sondern Gebote!	4	F					0	Blau	nein	Dortmund
Saft/ Obststände	4	A					0	Blau	nein	Dortmund
Öffentliches Picknick/ Grillen/ Kessel/ Lagerfeuer	4	A	D				0	Blau	nein	Dortmund
Food Trucks (organisch)	4	A	I				0	Blau	nein	Dortmund
Gemeinsam bewusst essen	4	E	N	O			0	Blau	nein	Dortmund
Street Food Festivals	4	A	D				0	Blau	nein	Dortmund
Transparenz erzeugen, Spiegel vorhalten	4	C					3	Grün	ja	Dortmund
Wert-/ werbungsfreie Lebensmittel (Bewertung nur nach Inhalt, z.B. „mit x % Fruchtanteil“ anstatt „mit hohem Anteil an …“	4	D					7	Grün	ja	Dortmund
Verbraucher besuchen Bauernhöfe und sprechen über Tierhaltung, Düngung usw.	4	B					7	Grün	ja	Dortmund
Praxis und Theorie verbinden -> Bildung durch „Machen“	4	B					2	Grün	ja	Dortmund
Menschen den Leistungsdruck nehmen: damit mehr Zeit bleibt, Essen zu zelebrieren. Schnelllebigkeit verlangsamen	4	N	Q				2	Grün	ja	Dortmund
Vertrauen durch Ehrlichkeit schaffen	4	C					1	Grün	nein	Dortmund
Menschen persönlich berühren	4						2	Grün	nein	Dortmund
Lernen und Lehrende müssen viel mehr Wertschätzung bekommen	4	E	O				0	Grün	nein	Dortmund
Interdisziplinäre Informationsveranstaltungen (leicht und spielerisch)	4	B					0	Grün	nein	Dortmund
Verantwortlich handeln = Pflicht und Regeln (Bsp. öffentliche Fläche darf frei genutzt und gestaltet werden)	4						0	Grün	nein	Dortmund
Kunde (alle Wirtschaftszwecke solidarisch organisieren, neue logistische Prozesse), Landwirt Unternehmer (noch keine Notiz)	4						0	Grün	nein	Dortmund
Gemeinsam kochen und essen	4	E	M	N			0	Grün	nein	Dortmund
Bezahlbarkeit des „echten Produktpreises“ (Vollkosten) sicherstellen	4	H					3	Rot	ja	Dortmund
Kochkurse als Gemeinschaftserlebnis und Lernort für praktische Lebenserfahrung und Freude/ Lachen J	4	E	M				2	Rot	ja	Dortmund
Gesicherte staatliche Bildungsfinanzierung	4	F					2	Rot	ja	Dortmund
Der wahre Wert der Ware -> faire Marktbedingungen schaffen -> Regional (Arbeitsplätze)	4	H	J				3	Rot	ja	Dortmund
Massentierhaltung verbieten (plus neue strengere Düngemittelverordnung)	4	F					6	Rot	ja	Dortmund
Food Sharing ausbauen und Konservierungsmöglichkeiten wieder aufleben lassen	4	B	E				1	Rot	nein	Dortmund
Bessere Work-Life-Balance durch z.B. 6 Stunden statt 8 Stunden Arbeitstage	4	F	Q				1	Rot	nein	Dortmund
Foodassembling - Solidarische Landwirtschaft	4	E	G				1	Rot	nein	Dortmund
Differenzierte & geprüfte Kennzeichnungspflicht (regional, saisonal, ökologisch, vegan/ vegetarisch, samenfest)	4	C	F	I	J	K	1	Rot	nein	Dortmund
Ernährungsrat gründen	4	F					1	Rot	nein	Dortmund
Urban Gardening, SPIN-Farming, small plot intensive gardening	4	G	R				0	Rot	nein	Dortmund
Direkte Kontakte und Erfahrungsaustausch durch offene Zentren/ Infrastrukturen fördern	4	B	E				0	Rot	nein	Dortmund
Aufklärung über ungesunde Nahrungsmittel und auf sich anpassen	4	B					0	Rot	nein	Dortmund
Mit kreativen Aktionen Alternativen bieten/ aufzeigen	4	A	D				0	Rot	nein	Dortmund
Werbung: „Mund zu Mund“	4	D					0	Rot	nein	Dortmund
Einzigartigkeit jedes Lebensmittels in der Saison und Region hervorheben, Spiel und Erfahrung (Info in Schulen/ Lebensmittelläden)	4	B	D	J	K		0	Rot	nein	Dortmund
Staatliche Förderung von Eigenanbau (für Pflanzen)	4	F	G				0	Rot	nein	Dortmund
Klar und überprüfbare/ geprüfte Informationen	4	C					0	Rot	nein	Dortmund
Gesetze für Direktvermarktung (Schutzzölle?)	4	A	F				0	Rot	nein	Dortmund
Globale Gesetzgebung Strafen für Firmen bei Umweltverschmutzung und Förderung für Nachhaltigkeit	4	F					0	Rot	nein	Dortmund
Vorteile für Unternehmen herausstellen (Vertrauen, Kundenbindung)	4	B	D				0	Rot	nein	Dortmund
Kontrollen bei nachhaltiger Produktion erfordern Arbeitsplätze auch als Kaufgrund	4						0	Rot	nein	Dortmund
Unterstützung/ Plattform für Kleinunternehmer und Newcomer in Sachen Lobbyarbeit	4						0	Rot	nein	Dortmund
Sensibilisieren und Verbraucher das Gefühl geben, dass die individuelle Kauf-/ Konsumentscheidung bedeutsam ist	4	B					2	Gelb	ja	Kassel-Witzenhausen
Mehr Aufklärung in Schulen! -> Kinder inspirieren wiederum ihre Eltern	4	B					1	Gelb	ja	Kassel-Witzenhausen
Mehr solidarische Landwirtschaft	4	E	G				3	Gelb	ja	Kassel-Witzenhausen
Die Selbstversorgung sollte gefördert werden, damit die Verbindung zwischen Tier/ Pflanze und Mensch intensiver und nachvollziehbar wird	4	G					3	Gelb	ja	Kassel-Witzenhausen
Externe Kosten internalisieren	4	F	H				4	Gelb	ja	Kassel-Witzenhausen
Gemeinschaftsgärten (als Einstiegshilfe)	4	E	G				1	Gelb	nein	Kassel-Witzenhausen
Mehr Bildung über Nachhaltigkeit in Schulen	4	B					1	Gelb	nein	Kassel-Witzenhausen
Unnötige Verpackungen verbieten	4	S					1	Gelb	nein	Kassel-Witzenhausen
Hofläden, offene landwirtschaftliche Betriebe, Eigenverarbeitung der Produkte statt Discounter und Supermärkte	4	A	G				1	Gelb	nein	Kassel-Witzenhausen
Verbot gewisser Substanzen, Verpackungen, Haltungsformen, Methoden, ...	4	F	S				1	Gelb	nein	Kassel-Witzenhausen
Essenskultur aufwerten	4	P					0	Gelb	nein	Kassel-Witzenhausen
Kochgruppen/ Ernährungsgruppen bilden	4	E	M				0	Gelb	nein	Kassel-Witzenhausen
Von Klein auf: Kindergärten, Schulen, Mensen, Kantinen	4	A					0	Gelb	nein	Kassel-Witzenhausen
Soli- Obstwiesen (Mundraub)	4	A	E				0	Gelb	nein	Kassel-Witzenhausen
Gewissens-App	4	D					0	Gelb	nein	Kassel-Witzenhausen
Faire Entlohnung für faire (Produktions-)Bedingungen	4	F					0	Gelb	nein	Kassel-Witzenhausen
Nudges	4						0	Gelb	nein	Kassel-Witzenhausen
Containern legalisieren	4	F					0	Gelb	nein	Kassel-Witzenhausen
Solawi	4	E	G				0	Gelb	nein	Kassel-Witzenhausen
Ernährungsrat	4	F					0	Gelb	nein	Kassel-Witzenhausen
Vernetzung von Wissenden mit Nicht-wissenden durch Mentorenprogramme	4	B	E				0	Gelb	nein	Kassel-Witzenhausen
Keine konventionelle Landwirtschaft mehr	4	F	G				0	Gelb	nein	Kassel-Witzenhausen
Ernährungsrat	4	F					0	Gelb	nein	Kassel-Witzenhausen
Schilder mit Wasser/ CO2 Verbrauch direkt neben Lebensmittel im Supermarkt	4	C	D				0	Gelb	nein	Kassel-Witzenhausen
Tierbilder auf Fleischpackungen wie Zigarettenpackung	4	B	C	D			0	Gelb	nein	Kassel-Witzenhausen
Ernährungsdokus als Prämie für Einkäufe	4	B	D				0	Gelb	nein	Kassel-Witzenhausen
Verbraucherbildung/ -informationen in Supermärkten (LEH)	4	B					0	Gelb	nein	Kassel-Witzenhausen
Transparenz bzgl. Produktionsprozesse „Schock-Fotos“ à la Zigarettenpackungen??	4	B	C	D			0	Gelb	nein	Kassel-Witzenhausen
Weniger Auswahl macht die Entscheidung einfacher! -> Angebot, wer gestaltet das?	4	A					0	Gelb	nein	Kassel-Witzenhausen
„Konsumenten“ mit einbeziehen -> persönliche Story muss her	4						0	Gelb	nein	Kassel-Witzenhausen
Ökonomische Zwänge verhindern oft eine „gute“ Auswahl -> dem „Markt“ die Zähne brechen?	4	A	F				0	Gelb	nein	Kassel-Witzenhausen
Diskurs zwischen Verbrauchern und Erzeugern fördern/ Treffpunkte schaffen	4	B	E				0	Gelb	nein	Kassel-Witzenhausen
„Einkaufshilfen“, Rezepte -> Barrieren abbauen	4	B	L				0	Gelb	nein	Kassel-Witzenhausen
Motivationsanreize	4						0	Gelb	nein	Kassel-Witzenhausen
Einblicke in Produktion	4	C	G				0	Gelb	nein	Kassel-Witzenhausen
Konfrontation	4	B					0	Gelb	nein	Kassel-Witzenhausen
Werbung für „Ungesundes“ -> Risiko aufzeigen wie bei Zigaretten	4	B	D				0	Gelb	nein	Kassel-Witzenhausen
Mehr Wissen über die Produkte -> Transparenz	4	B	C				0	Gelb	nein	Kassel-Witzenhausen
Zutatenlisten – mit größerem Stellenwert	4	C					0	Gelb	nein	Kassel-Witzenhausen
Lebensmittelverpackungen mit Hinweisen	4	B	C				0	Gelb	nein	Kassel-Witzenhausen
Versorgung ohne internationale Importe	4	A	F				0	Gelb	nein	Kassel-Witzenhausen
Regionale Läden	4	A	J				0	Gelb	nein	Kassel-Witzenhausen
Aufklärung	4	B					0	Gelb	nein	Kassel-Witzenhausen
Durch monetären Anreiz z.B. günstigere Krankenversicherungsbeiträge, subventionierte Obst- und Gemüseprodukte	4	F	H				0	Gelb	nein	Kassel-Witzenhausen
„Soziale Kontrolle“ innerhalb Familien und WG-Zusammenhänge	4	E					0	Gelb	nein	Kassel-Witzenhausen
Fläche pro Kopf für bedarfsgerechte Ernährung	4						0	Gelb	nein	Kassel-Witzenhausen
Versorgung „zeitgenössischer“ Lebensweisen: Single, Dinkis, Pendler	4	A					0	Gelb	nein	Kassel-Witzenhausen
Wissen weiter kommunizieren	4	B					0	Gelb	nein	Kassel-Witzenhausen
Luxus: Ernährung und Nahrung	4						0	Gelb	nein	Kassel-Witzenhausen
Ernährung von Ärzteseite mehr gewichten	4	B					0	Gelb	nein	Kassel-Witzenhausen
Kochen, Backen, Einmachen, Konservieren, Vorratshaltung... wieder attraktiver machen, bzw. handwerkliches Können vermitteln	4	B	D	M	P		2	Orange	ja	Kassel-Witzenhausen
Kreislaufwirtschaft als Standard etablieren	4	G					1	Orange	ja	Kassel-Witzenhausen
Sich zusammen tun	4	E					1	Orange	ja	Kassel-Witzenhausen
Ökologischen Fußabdruck auf dem Produkt verzeichnen	4	C					5	Orange	ja	Kassel-Witzenhausen
Ökologischen Fußabdruck der Produkte bestimmen, denn: ein deutscher Lagerapfel ist nicht zwangsläufig „nachhaltiger“ als ein Importprodukt (auch, wenn das schön wäre!)	4	B					1	Orange	nein	Kassel-Witzenhausen
Positive Zukunftsszenarien entwerfen, die einfach umzusetzen sind -> realitätsnah, mit dem Menschen	4						1	Orange	nein	Kassel-Witzenhausen
Ernährungsbewusstsein mit kulturellen Aktionen (Bsp. Gemeinschaftsprojekt von Künstlern aus allen Ländern fördern: Komponieren, Dichten, Malen)	4	D	O	P			0	Orange	nein	Kassel-Witzenhausen
Anti-Konsumgesellschaft -> Trend; Wie viel Essen brauche ich wirklich -> weniger wegwerfen	4	A	D	E			0	Orange	nein	Kassel-Witzenhausen
Banderolen statt Plastikverpackungen zur Differenzierung von Lebensmitteln	4	S					0	Orange	nein	Kassel-Witzenhausen
Konkrete Handlungsvorschläge machen und deren Nachhaltigkeitsimpact anzeigen (low vs. high)	4	B					0	Orange	nein	Kassel-Witzenhausen
Durch eindeutige und selbsterklärende Labels Rückverfolgbarkeit ermöglichen	4	B	C				0	Orange	nein	Kassel-Witzenhausen
Geplanter Obsoleszenz entgegenwirken (Gesetze, Zertifikat, Prämien)	4	F					0	Orange	nein	Kassel-Witzenhausen
Wie gelingt eine gerechte Verteilung von Nahrungsmitteln?	4						0	Orange	nein	Kassel-Witzenhausen
Mehr Meditationskurse anbieten in Schulen/ Unternehmen, um Glück/ Zufriedenheit in sich und nicht in äußeren Sachen zu finden	4						0	Orange	nein	Kassel-Witzenhausen
Landwirtschaft in Lehrplan integrieren -> Lebensmittelproduktion und gesundheitsbezogene Aspekte	4	B	G				3	Blau	ja	Kassel-Witzenhausen
Ressourcenschonende Produktion (z.B. bei Elektrik austauschbare Materialien)	4	G					2	Blau	ja	Kassel-Witzenhausen
Wertschätzung von Lebensmitteln fördern	4	O					1	Blau	nein	Kassel-Witzenhausen
Slow-Food	4	D	E	O	P		1	Blau	nein	Kassel-Witzenhausen
Weg von der Wegwertgesellschaft! (Reparatur statt Vernichtung!)	4						1	Blau	nein	Kassel-Witzenhausen
Füreinander sorgen mit gesundem Essen	4	E					0	Blau	nein	Kassel-Witzenhausen
Esskultur (wieder-) herstellen	4	P					0	Blau	nein	Kassel-Witzenhausen
Biomüll Verwertung in Stadt-Gärten	4	R					0	Blau	nein	Kassel-Witzenhausen
Alternativkonsum für Feste und Feiern (z.B. Weihnachtsbraten)	4	A	E				0	Blau	nein	Kassel-Witzenhausen
Gemeinschaftlichkeit beim Essen und Kochen	4	E	M	N			0	Blau	nein	Kassel-Witzenhausen
Definition zu Regionalität entwickeln	4	J					0	Blau	nein	Kassel-Witzenhausen
Rezeptideen Inspirationen	4	B					0	Blau	nein	Kassel-Witzenhausen
Soziale Kontrolle	4	E					0	Blau	nein	Kassel-Witzenhausen
Rezeptideen austauschen (z.B. vegane Kuchen)	4	B	E				0	Blau	nein	Kassel-Witzenhausen
Auf Verbrauch(er) angepasster Vertrieb	4	A					0	Blau	nein	Kassel-Witzenhausen
Landbaupraktika für alle Schüler	4	B	G				1	Grün	ja	Kassel-Witzenhausen
Anreize (monetär) für Müllentsorgung/ Recycling schaffen	4						4	Grün	ja	Kassel-Witzenhausen
Kommunen -> Feste/ Märkte: Probieren von alten Sorten. Themenbezogene Stände, Infos, Spiele, Rezepte	4	B	D				4	Grün	ja	Kassel-Witzenhausen
Eingeschränktes Angebot z.B. nur regional. Trotzdem kann man viele Bedürfnisse abdecken (ein Laden für alles)	4	A	J				2	Grün	ja	Kassel-Witzenhausen
Foodsharing Verteilerlisten	4	E					1	Grün	nein	Kassel-Witzenhausen
Umdenken fördern	4	B					1	Grün	nein	Kassel-Witzenhausen
Kommunikation, Akzeptanz	4	B					0	Grün	nein	Kassel-Witzenhausen
Bildungsarbeit/ Erlebnispädagogik	4	B					0	Grün	nein	Kassel-Witzenhausen
Permakultur „Showflächen“ auf Grünflächen in Städten	4	G	R				0	Grün	nein	Kassel-Witzenhausen
Lobbyismus unterbinden	4	F					2	Rot	ja	Kassel-Witzenhausen
Anreize für ökologische Produktion: monetär, Prestige, garantierte Abnahme durch Verarbeiter	4	F	E				2	Rot	ja	Kassel-Witzenhausen
Umweltkosten in Produktkosten einbeziehen	4	H					4	Rot	ja	Kassel-Witzenhausen
Brennnesseln als Superfood etablieren	4	D					1	Rot	nein	Kassel-Witzenhausen
Förderung von ökologischer bäuerlicher Landwirtschaft - Kleinbetriebe statt Großbetriebe	4	F	G				1	Rot	nein	Kassel-Witzenhausen
Urban Gardening in Freiflächen/ unbenutzten Stadtflächen/ Parks/ Grünstreifen	4	G	R				1	Rot	nein	Kassel-Witzenhausen
Energiepreise erhöhen/ besteuern	4	F					1	Rot	nein	Kassel-Witzenhausen
Bildung: Bewusstsein und Information über Nahrung -> Nähe, Identifikation	4	B	O				0	Rot	nein	Kassel-Witzenhausen
Begrenzter Import	4	A	F				0	Rot	nein	Kassel-Witzenhausen
Subventionierung	4	F					0	Rot	nein	Kassel-Witzenhausen
Förderung von kleinstrukturierter Landwirtschaft mit größerer Einbeziehung der Verbraucher	4	F	G	E			0	Rot	nein	Kassel-Witzenhausen
Unterstützung von Kleinunternehmern auch durch Verbraucher	4	G	E				0	Rot	nein	Kassel-Witzenhausen
Negativ Gentechnikkennzeichnung	4	C	F				0	Rot	nein	Kassel-Witzenhausen
EU-Normen nachhaltig gestalten (und z.B. Lebensmittelabfälle vermeiden)	4	F					0	Rot	nein	Kassel-Witzenhausen
Anzahl des Spritzens auf Produkt kennzeichnen (vielleicht der Durschnitt)	4	C					0	Rot	nein	Kassel-Witzenhausen
Kleinbäuerliche Strukturen stärken	4	G					0	Rot	nein	Kassel-Witzenhausen
Überdüngung verbieten -> Richtlinien eventuell strenger	4	F					0	Rot	nein	Kassel-Witzenhausen
Direktvermarktung: Landwirt -> Kundenkontakt	4	A	G				0	Rot	nein	Kassel-Witzenhausen
Food Chains verkürzen (z.B. Food Coop)	4						0	Rot	nein	Kassel-Witzenhausen
Bildungsarbeit unabhängig von z.B. großen Konzernen (ebenso Forschung)	4	B					0	Rot	nein	Kassel-Witzenhausen
Veröffentlichungspflicht aller Forschung (innerbetrieblich schwierig)	4	B					0	Rot	nein	Kassel-Witzenhausen
Schutz regionaler Produktion ( z.B. Label…)	4	F	J				0	Rot	nein	Kassel-Witzenhausen
Auf die Macht der Konzerne aufmerksam machen	4	B					0	Rot	nein	Kassel-Witzenhausen
Förderung von Bewegung in allen Altersklassen	4						0	Rot	nein	Kassel-Witzenhausen
Ambivalente Berichterstattung fördern	4	B	D				0	Rot	nein	Kassel-Witzenhausen
Transparente Politik	4	C	F				0	Rot	nein	Kassel-Witzenhausen
Abschaffung von Plastikverpackung	4	S					0	Rot	nein	Kassel-Witzenhausen
Entlohnung konkreter Umweltmaßnahmen in Produktion/-skette	4						0	Rot	nein	Kassel-Witzenhausen
Eine Lebensmittel-Tauschbörse in der Nähe	4	A	E				1	Gelb	ja	Hamburg
Schulsystem umgestalten: Theorie und Praxis eines nachhaltigeren Lebensstils	4	B					2	Gelb	ja	Hamburg
Lobby der Lebensmittelindustrie politisch reglementieren	4	F					1	Gelb	nein	Hamburg
In jedem Stadtteil eine Volksküche, perfekt organisiert	4	E	M	R			1	Gelb	nein	Hamburg
Verbraucher braucht Informationen (die Wahrheit)	4	B					1	Gelb	nein	Hamburg
Aufklärungsansätze in der Schule	4	B					1	Gelb	nein	Hamburg
Globale Änderung der politischen Mächte ansteuern	4	F					0	Gelb	nein	Hamburg
Bildung (Bildung für nachhaltige Entwicklung) von klein auf	4	B					0	Gelb	nein	Hamburg
Bedürfnisse reduzieren – am Ende des Tages muss die Theke der Bäckerei nicht voll sein	4	A					0	Gelb	nein	Hamburg
Mensen/ Kantinen in Betrieben mit regionalen/ sozialen Produkten	4	A	J				0	Gelb	nein	Hamburg
Warenangebot reduzieren	4	A					0	Gelb	nein	Hamburg
Mehr Vernetzungen bilden	4	B					0	Gelb	nein	Hamburg
Problem: Gemütlichkeit; Lösung: Unterstützung, Motivation -> Werbung, soziale Medien	4	D					0	Gelb	nein	Hamburg
Problem: Preis (zu hoch); Lösung: Steuererleichterungen für Personen, die nachhaltig Leben -> nachhaltige Produkte konsumieren	4	F	H				0	Gelb	nein	Hamburg
Problem: nicht nachhaltige Produkte (-> Industrien) werden zu stark unterstützt; Lösung: Subventionen streichen/ kürzen -> nachhaltige Produkte subventionieren	4	F					0	Gelb	nein	Hamburg
Nachhaltig/ bio/ regional muss normal sein/ werden. Nicht-nachhaltig die „Ausnahme“	4	I	J				0	Gelb	nein	Hamburg
Rahmenbedingungen neu setzen externe Kosten in Produkte einpreisen. Nicht-nachhaltig darf nicht billiger sein	4	H					0	Gelb	nein	Hamburg
Aufklärung und Vermittlung ethischer Werte in der Schule	4	B					0	Gelb	nein	Hamburg
Menschen orientieren sich an „Vorbildern“ -> Promis, Politiker sollen einen nachhaltigen Lebensstil vorleben	4	D	E				0	Gelb	nein	Hamburg
Bildung und Aufklärung früh beginnen	4	B					0	Gelb	nein	Hamburg
Supermärkte mit saisonalen Produkten bzw. stärkere Ausschilderung	4	A	K				0	Gelb	nein	Hamburg
Ansätze wie: „Vegan Taste Week“ fördern!	4	D					0	Gelb	nein	Hamburg
Bewusstsein fördern, was in Lebensmitteln drinsteht!	4	O					0	Gelb	nein	Hamburg
Bewusstwerden, dass so ein hoher Verbrauch an tierischen Lebensmittel nicht „schon immer so war“!	4	O					0	Gelb	nein	Hamburg
Mehr Praxis (erleben), weniger Theorie (zerreden)	4	B					0	Gelb	nein	Hamburg
Weniger Ideologie (wer ist der bessere Mensch)	4						0	Gelb	nein	Hamburg
Einfache Heuristiken, die für jeden einsichtig sind	4						0	Gelb	nein	Hamburg
Wenn ich alt bin, gibt es ein Bio-Ernährungssystem, dass mich versorgt	4	I					0	Gelb	nein	Hamburg
Problem: Werbung und Verführung von Kunden; Lösung: Werbung gegen Verführung!	4	D					0	Gelb	nein	Hamburg
Menschen wissen, was mit Tieren und Umwelt geschieht -> es ihnen oft zeigen!	4	B					0	Gelb	nein	Hamburg
Problem: zu wenige Optionen -> zu unbekannt; Lösung: mehr Optionen, Werbung	4	A	D				0	Gelb	nein	Hamburg
Mehr Menschen den Zugang zu Wissen und Erfahrung sammeln bieten	4	B					0	Gelb	nein	Hamburg
Chemieindustrie kontrollieren, z.B. Pestizide Herstellung und Anwendung	4	F					0	Gelb	nein	Hamburg
Guerilla-Aktion: Im Laden Preisschilder auf Produkte kleben mit den „wahren Kosten“	4	D	E	H			2	Orange	ja	Hamburg
Regional-Rabatt, Inhabergeführt-Rabatt, Nachbarschafts-Rabatt (Nicht-online-Kauf-Rabatt)	4	D	J				1	Orange	ja	Hamburg
Zwischen Gerechtigkeit und Massentierhaltung Lücke schließen, Huhnaktie anbieten/ erwerben	4						1	Orange	ja	Hamburg
Verbot von Pestiziden und Kunstdünger	4	F					1	Orange	ja	Hamburg
Netzwerken, Kooperationen schaffen!	4	E					2	Orange	ja	Hamburg
Verpackungsarme Läden (-> Selbstabfüllung)	4	A	S				3	Orange	ja	Hamburg
Transparenz: alles hängt miteinander zusammen, Implikation des Handelns sichtbar machen	4	C					1	Orange	nein	Hamburg
Wegweiser erstellen (Orientierungslosigkeit)	4						0	Orange	nein	Hamburg
Gemeinsam findet man schneller aus dem Labyrinth -> Netzwerk	4	E					0	Orange	nein	Hamburg
Lebensmittelkauf im Westen reduzieren	4	L					0	Orange	nein	Hamburg
Lebensmittelauswahl reduzieren, keine Discounter mehr!	4	A					0	Orange	nein	Hamburg
Achtgeben auf Entwicklungsländer: keine Ausbeutung mehr -> mehr Spenden und Anbaumöglichkeiten	4	F					0	Orange	nein	Hamburg
Problem: „Angst“ etwas zu verändern; Lösung: Mut zusprechen -> Inspiration und Motivation	4						0	Orange	nein	Hamburg
Dem Westen die Situation in Entwicklungsländern vor das Auge bringen -> Wissen, zum Handeln animieren	4	B	F				0	Orange	nein	Hamburg
Vielfalt und Kreislaufwirtschaft statt Monokultur (Bsp. Permakultur)	4	G					0	Orange	nein	Hamburg
Immer wieder darauf hinweisen, dass die Möglichkeiten „unseres“ Planeten endlich (!) sind	4	B					0	Orange	nein	Hamburg
Immer wieder die persönliche Mitverantwortung für „unseren“ Planeten deutlich machen	4	B					0	Orange	nein	Hamburg
Immer wieder auf die einmalige Chance hinweisen, die unser Planet dem „Leben“ bietet	4	B					0	Orange	nein	Hamburg
Auf Menschen zugehen, nicht zu verurteilen, sondern Möglichkeiten aufzeigen	4	E					0	Orange	nein	Hamburg
Problem: viele haben nicht das Gefühl, dass sie allein etwas verändern können; Lösung: durch Organisation zeigen, dass viele dabei sind	4	E					0	Orange	nein	Hamburg
Problem: viele verdrängen die Zeit und die Probleme; Lösung: zeigen, dass Probleme entstehen/ bald entstehen werden	4	B					0	Orange	nein	Hamburg
Naturnahe Landwirtschaft fördern mi vielen unterschiedlichen Kulturen (Vielfalt)	4	G					2	Blau	ja	Hamburg
Verantwortungsvolle Schulverpflegung – Lerneffekt der Kinder	4	A	B				5	Blau	ja	Hamburg
Eigenverantwortung fördern	4						1	Blau	ja	Hamburg
Offenlegung zu Produktionsweisen, Transportwege, Inhaltsstoffe -> durch Gesetz geben	4	C	F				4	Blau	ja	Hamburg
Selbstversorgerstadt	4	G	R				1	Blau	ja	Hamburg
Bio Sortiment an der Tankstelle/ Raststätte/ Bahnhofskiosk/ Krankenhauskiosk/ Flugplatz	4	A	I				2	Blau	ja	Hamburg
Das Vertrauen des Verbrauchers in den Produzenten wiederherstellen - Ethik	4	C					1	Blau	nein	Hamburg
Den Menschen den Gedanken einpflanzen, dass weniger oft mehr bedeutet. Weniger konsumieren – gesünder (seelisch und körperlich) leben	4						1	Blau	nein	Hamburg
Zertifizierung auf Prüfstand stellen	4	F					0	Blau	nein	Hamburg
Transparenz	4	C					0	Blau	nein	Hamburg
Informationen über Produkte vernetzen -> Wo bekomme ich was?	4	B	E				0	Blau	nein	Hamburg
Vegan-Check (Woher kommt Soja? Gentechnikfrei? Welche E-Nummern? Lebensmittel-Deklaration -> Ampel)	4	B	C				0	Blau	nein	Hamburg
Bodenfruchtbarkeit erhalten durch Kreislaufwirtschaft	4	G					0	Blau	nein	Hamburg
„Es ist zu spät“ -> Demotivation; Zeigen, dass es nie zu spät ist um etwas zu verändern/ besser zu machen	4	B					0	Blau	nein	Hamburg
Alternativen Schaffen!	4						0	Blau	nein	Hamburg
Gemeinsame Ziele und Kriterien erarbeiten und festlegen; Gemeinsam umsetzen, bei wem einkaufen; Gemeinsam Kochen und genießen	4	E	L	M	N		0	Blau	nein	Hamburg
Arbeitgeber Verantwortung für die Gesundheit der Arbeitnehmer einfordern (gesetzliche Regelung)	4	F					0	Blau	nein	Hamburg
Lokal, regional und saisonal; Info und Netzwerke (z.B. Regionalwert AG)	4	B	E	J	K		0	Blau	nein	Hamburg
Urban Gardening fördern; Bio/ regional/ Gemeinschaft	4	E	G	I	J	R	0	Blau	nein	Hamburg
Mehr Kontrolleure für mehr Transparenz	4	C					0	Blau	nein	Hamburg
Ernährung als Unterrichtsfach (Kochen, Gartenarbeit...)	4	B					7	Grün	ja	Hamburg
Vorbilder inszenieren	4	D					1	Grün	ja	Hamburg
Politische Unterstützung der regionalen Landwirtschaft	4	F	G	J			1	Grün	ja	Hamburg
Ernährungsparlament	4	F					1	Grün	ja	Hamburg
Einen Ernährungsausschuss in der Stadtverwaltung etablieren	4	F	R				3	Grün	ja	Hamburg
Kommunales Stadtteilhaus -> Nachhaltigkeitsgedanken in Gruppen erleben, die gemeinsam Kampagnen entwickeln, gestalten, ...	4	D	E	R			2	Grün	ja	Hamburg
Mehr Workshops als Pflichtveranstaltungen	4	B					2	Grün	ja	Hamburg
Mit Hilfe von Edukation Werte vermitteln und das Erreichen von Zielen erleichtern	4	B					3	Grün	ja	Hamburg
Eine politische Partei bilden	4	E	F				1	Grün	nein	Hamburg
Förderung von „Soft skills“ (Organisation, Kommunikation, Präsentation, etc.) damit gesetzte Ziele auch in Angriff genommen und überzeugend umgesetzt werden können	4	B					1	Grün	nein	Hamburg
Erfahrungsmöglichkeiten bieten (WOOF, Hofbesuche, Mitarbeit)	4	B	G				0	Grün	nein	Hamburg
Transparenz und schnelle Vernetzung durch z.B. App	4	C	D				0	Grün	nein	Hamburg
Sensible Lebensphasen (Schwangerschaft etc.) durch Praxis- und Lernerfahrungen begleiten	4	B					0	Grün	nein	Hamburg
Problem: Ungewissheit, nicht ausreichendes Wissen; Lösung: Podiumsdiskussionen, Veranstaltungen wie Unterricht	4	B					0	Grün	nein	Hamburg
Transdisziplinäre Arbeit	4	E					0	Grün	nein	Hamburg
Externe Kosten (z.B. für Nitratbelastung, Testaufwand für Antibiotikaresistenz) ausweiten und als Steuer aufschlagen	4	F					1	Rot	ja	Hamburg
Lokale Handelswege optimieren	4	J					1	Rot	ja	Hamburg
Lobbyismus in Agrar- und Lebensmittelindustrie sehr streng regeln bzw. verbieten	4	F					5	Rot	ja	Hamburg
Belohnung für regionale Produkte	4	J					1	Rot	ja	Hamburg
Bio und Fairtrade fördern!	4	F	I				1	Rot	ja	Hamburg
Korrelation zwischen Fehlernährung und Krankheit veröffentlichen! (Diabetes, Krebs)	4	B					1	Rot	ja	Hamburg
Lügen und Lobbyismus transparent machen	4	C					1	Rot	ja	Hamburg
Umweltstandards erhöhen	4	F					1	Rot	nein	Hamburg
Mehr Transparenz	4	C					1	Rot	nein	Hamburg
Pestizide, Herbizide boykottieren	4	F					1	Rot	nein	Hamburg
Tierschutzstandards erhöhen	4	F					1	Rot	nein	Hamburg
Aktivisten fördern	4	E					1	Rot	nein	Hamburg
Mindestlohn erhöhen	4	F					0	Rot	nein	Hamburg
Staat vor privat	4	F					0	Rot	nein	Hamburg
Preis über Kaufanreize	4	H					0	Rot	nein	Hamburg
Öffentliche Aufträge auf Basis von Qualität	4	B	I				0	Rot	nein	Hamburg
Transparenz fördern	4	C					0	Rot	nein	Hamburg
Biosprit verbieten -> Kein Energiemais mehr!	4	F					0	Rot	nein	Hamburg
Budgets für Schulen und Kitas erhöhen	4	F					0	Rot	nein	Hamburg
Verlogene Werbebotschaften verbieten	4	D	F				0	Rot	nein	Hamburg
Lokalisierung der Nahrungsproduktion	4	G	J				0	Rot	nein	Hamburg
Verbot Grundwasser für Landwirtschaft zu nutzen	4	F	G				0	Rot	nein	Hamburg
Verfremdung von Werbung	4	D					0	Rot	nein	Hamburg
Höhere Steuersätze/ MwSt./ Einkommenssteuer für konventionelle Produkte	4	F					0	Rot	nein	Hamburg
Wahrheitsgemäße Fakten zu Landwirtschaft in der Schulbildung	4	B					0	Rot	nein	Hamburg
Transparente Preispolitik und ehrliche Konkurrenz	4	C	H				0	Rot	nein	Hamburg
Flugpreise erhöhen	4	F					0	Rot	nein	Hamburg
Qualität statt Quantität fördern	4	F	G				0	Rot	nein	Hamburg
Gewinnmaximierung steht nicht vor Naturschutz	4	F					0	Rot	nein	Hamburg
Bio-Zertifikate kostenlos -> über Kunstdünger-/ Pestizidsteuer finanzieren	4	F	I				0	Rot	nein	Hamburg
Freibeträge für Biolandwirtschaft	4	F	I				0	Rot	nein	Hamburg
Subventionen für Bio-Landbau und Nachhaltigkeit	4	F	I				0	Rot	nein	Hamburg
Kleinvereine bilden von Mittelstandunternehmen (gegen Globalisierung)	4	E					0	Rot	nein	Hamburg
Tierschutzvereine und -Initiativen schaffen und zusammenlegen	4	E					0	Rot	nein	Hamburg
Bodenpreise senken	4	F					0	Rot	nein	Hamburg
Diverse Angebote an lokalen Produkten mit Rabatten du Aktionen bewerben	4	A	D	J			0	Rot	nein	Hamburg
GMOs verhindern und Saatdiversität fördern	4	F					0	Rot	nein	Hamburg
Deutliche Kennzeichnung der Produkte	4	C	F				1	Gelb	ja	Berlin
Herstellung / Herkunft der Produkte auf Verpackung schreiben (wie bei Abschreckfotos auf Zigaretten)	4	B	C	D			1	Gelb	ja	Berlin
Keine Bevormundung (-> stößt ab) sondern Empowerment (z.B. Kampagnen, Top-Down Bestimmung, gesetzliche Regulierung)	4	B	D	E			1	Gelb	ja	Berlin
Internalisierung von Kosten	4	F	H				2	Gelb	ja	Berlin
Werbung regulieren!! (Realitätsbezug, Materialismus & Konsumismus)	4	D	F				1	Gelb	ja	Berlin
GAP Greening statt „Flächensubventionen“	4	F					1	Gelb	nein	Berlin
Öffentliche Werbung steigern	4	D					1	Gelb	nein	Berlin
Regional (gesamt) Produktion fördern – weltweit	4	G	J				1	Gelb	nein	Berlin
Zerstückelung der Warenproduktion stoppen, um Verständnis für Zusammenhänge zu halten.	4	G					1	Gelb	nein	Berlin
Essbare Stadt	4	G	R				1	Gelb	nein	Berlin
Schulunterricht	4	B					0	Gelb	nein	Berlin
Ernährungslehre	4	B					0	Gelb	nein	Berlin
Staatliche (EU und D) Förderung von nachhaltiger Produktion	4	F	G				0	Gelb	nein	Berlin
Förderung (Preis? Was wird derzeit subventioniert und sollte stattdessen…)	4	F	H				0	Gelb	nein	Berlin
Preis der Nahrungsmittel nach Umweltimpact ausrichten	4	H					0	Gelb	nein	Berlin
Gemeinschaft fördern (weg von Ellenbogengesellschaft…)	4	E					0	Gelb	nein	Berlin
Aufklärung	4	B					0	Gelb	nein	Berlin
Preisspanne konventionell - Bio	4	H	I				0	Gelb	nein	Berlin
Kostendifferenz von gesunden/nachhaltigen Produkten minimieren	4	H					0	Gelb	nein	Berlin
Mehr Aufklärungsarbeit über Produkte, Herstellung & Konsequenzen für Tiere / Umwelt (& Alternativen)	4	B					0	Gelb	nein	Berlin
Kennzeichnung konventioneller Produkte	4	C					0	Gelb	nein	Berlin
Infos auf Produkten ggfs. Informationspflicht (Label) -> Nicht nur Zeichen wie „Bio“	4	B	C				0	Gelb	nein	Berlin
Mehr Förderung von Banken für Bio-Start-ups etc.	4	F	I				0	Gelb	nein	Berlin
Allmende: Wissen für alle verfügbar	4	B	E				0	Gelb	nein	Berlin
Preis vs. „Wenig Zeit“	4	H	Q				0	Gelb	nein	Berlin
Es gilt leider inzwischen als „unnormal“ sich sein Essen selbst zuzubereiten	4	M					0	Gelb	nein	Berlin
Preisschild mit „echtem“ Preis -> Gewissensappell	4	B	C	H			0	Gelb	nein	Berlin
Förderung lokaler Märkte	4	A	J				0	Gelb	nein	Berlin
Zu viele Optionen machen Entscheidung schwer -> gesetzliche Angebotsregulierung/ Herkunftsregulierung	4	A	F				0	Gelb	nein	Berlin
Direktverkauf	4	A	G				0	Gelb	nein	Berlin
(Breiteres) Angebot an nachhaltigen Verhaltensoptionen schaffen, z.B. subsidiäre Kreisläufe -> Läden vor Ort müssen regionales, ökologisches Angebot haben	4	A	I	J			0	Gelb	nein	Berlin
Preistransparenz: Anteil Marke/ Qualität	4	C	H				0	Gelb	nein	Berlin
Image von Nachhaltigkeit/ Bio-Produkten	4	D	I				0	Gelb	nein	Berlin
Wie bei „der Weg einer Jeans“ – Der Weg einer Hühnchenbrust…Food Inc./ Made in?	4	B	D				0	Gelb	nein	Berlin
Mehr Vertrauen in & Nachvollziehbarkeit von nachhaltigen Produkten	4	B	C				0	Gelb	nein	Berlin
Instant – Befriedigungskultur in verschiedenen gesellschaftlichen Zusammenhängen hinterfragen	4	P					0	Gelb	nein	Berlin
Begeisterung/ Interesse steigern, vermitteln	4						0	Gelb	nein	Berlin
Massentierhaltungssteuer einführen!	4	F					0	Gelb	nein	Berlin
Zugängliches Angebot für Alle	4	A					0	Gelb	nein	Berlin
Allmende: Sozietät/ soziale Beteiligung und Verantwortung und Wirkung/ erleben vs. Entfremdung aus Kreisläufen	4	B	E				0	Gelb	nein	Berlin
Mehr Aufklärung in Schulen	4	B					0	Gelb	nein	Berlin
(Lokale) Räte entscheiden: - welche Projekte/ Initiativen erhalten (öffentliche) Fördergelder = Andocken an dem, was ist, um Weichen für die Zukunft zu stellen	4	E	F	J			1	Orange	ja	Berlin
Interkulturelle Workshops/ Austauschprograme mit Dritt-Welt-Ländern	4	B	P				1	Orange	ja	Berlin
Herkunft der Produkte. Es sollte nicht nötig sein, immer alles zu kriegen! Saisonalität, Regionalität!	4	A	J	K			4	Orange	ja	Berlin
Sanktionen bei erhöhten Nitrateinträgen	4	F					1	Orange	ja	Berlin
Weg vom Überangebot	4	A					1	Orange	ja	Berlin
Nachhaltigkeit „spürbar“ machen – Preis?	4	H					5	Orange	ja	Berlin
Stopp der Privatisierung	4	F					1	Orange	nein	Berlin
Keine Privatisierung von Quellen	4	F					1	Orange	nein	Berlin
Wer braucht Label/ Siegel, wenn ökologisch/ nachhaltiges Handeln Gesetz/ Vorschrift ist	4	F					0	Orange	nein	Berlin
Nicht saisonale Produktpalette stark minimieren	4	A	K				0	Orange	nein	Berlin
Echte Preise	4	H					0	Orange	nein	Berlin
Mindestanteil von „Blumen-Flächen“ für Bienen	4	F					0	Orange	nein	Berlin
Projektwoche z.B. in Schule, „1 Woche lang leben aus der Natur“ -> Beseitigung Entfremdung	4	B					0	Orange	nein	Berlin
Ist Normierung immer sinnvoll? – Wiedererkennungswert geht verloren, wenn nur nach „Standard-Typ gesucht wird	4	A					0	Orange	nein	Berlin
Ökologische Erziehung ab Kindergarten, Schule; Über mehr TV-Dokumentationen -> wie können möglichst viele erreicht werden?	4	B	D				0	Orange	nein	Berlin
Gesetze zum Schutz des Lebens (Tierrecht/ -gerechtigkeit)	4	F					0	Orange	nein	Berlin
Durch Aufklärungsarbeit schon in Schulen/ Kindergärten auf die Endlichkeit der natürlichen Ressourcen aufmerksam machen -> Perspektivenwechsel	4	B					0	Orange	nein	Berlin
Transferwissen in Schulen fördern, indem in der Vergangenheit nach tragfähigen Verhaltensweisen geschaut wird. (Bsp. W. v. Siemens…)	4	B					0	Orange	nein	Berlin
Händler = Lehrer	4	B					0	Orange	nein	Berlin
Arbeitszeiten wieder reduzieren -> 30 h Woche	4	F					2	Blau	ja	Berlin
„Reste- App“ -> Reste in App anbieten zum Abholen von anderen	4	D					1	Blau	ja	Berlin
Kollektive Rituale zur Wertschätzung von Essen einführen (gemeinsames Kochen, Erntedank-Feste etc.)	4	E	N	O	P		3	Blau	ja	Berlin
Schulkantine durch Schüler betreiben lassen (teils)	4	B					2	Blau	ja	Berlin
Zugang zu Land für Eigenanbau/ Gemeinschaftsanbau	4	G					3	Blau	ja	Berlin
Kochkurse in allen Lebensbereichen anbieten: Schule, Ausbildung, Arbeit	4	B	M				1	Blau	ja	Berlin
Mehr Zeit für Ernährung; pers.: wie viel muss ich arbeiten?; gesellschaftliche Strukturen schaffen für Neubewegung von „Erfolg“ -> Facettenreich	4	Q					4	Blau	ja	Berlin
Essen -> Gemeinsam konsumieren, sich austauschen	4	B	E	N			1	Blau	nein	Berlin
Regionale Produkte & Anbieter mit moderner/ städtischer Welt verknüpfen (Internet / Lieferservice/ „Land“-Shops)	4	A	J	R			0	Blau	nein	Berlin
Runder Tisch; Mitarbeiter involvieren	4	E					0	Blau	nein	Berlin
Bewusstsein bei Arbeitgebern schaffen & deren Unterstützung einholen	4	O					0	Blau	nein	Berlin
Bild des Kreislaufs (Ernährung) in den Köpfen verankern -> Bildung, Werbung, Information (staatliche Aufgabe!)	4	B	D	F			0	Blau	nein	Berlin
Druck auf Lieferanten erhöhen, dass nur nachhaltige Produkte geliefert werden	4	A					0	Blau	nein	Berlin
Z.B. Solidarische Landwirtschaft als Alternative zu kapitalistischen Produktions-/ Eigentums Systemen	4	E	G				0	Blau	nein	Berlin
Direktvermarktung & Bauern-/ Produzenten Märkte (z.B. Handwerk, Bäcker, ...)	4	A	G				0	Blau	nein	Berlin
Küchen zum Kochen in den Unternehmen – eine umsetzbare Möglichkeit?	4	M					0	Blau	nein	Berlin
Austausch/ Netzwerk; Stadt - Land (Kultur, Lebenswelten kennenlernen)	4	E					0	Blau	nein	Berlin
Verantwortung zurückgeben an Konsumenten	4						0	Blau	nein	Berlin
Wertschätzung steigern für das Leben im Jetzt	4	B	O				0	Blau	nein	Berlin
BAD ≠ Easy - Make healthy food accessible	4	A					0	Blau	nein	Berlin
Auf Arbeit: Teams machen abwechselnd Mittagessen für alle! (Arbeitgeber stellen frei dafür)	4	E	M				0	Blau	nein	Berlin
Prinzip der staatlichen Förderung (z.B. EEG) für Selbstversorgerhöfe	4	A	F	G			0	Blau	nein	Berlin
Austausch an Informationen/ Meinungen	4	B					1	Grün	ja	Berlin
Nachhaltigkeit in einer Gruppe (z.B. Familie, Schule, Freunde) als Norm vermitteln -> Vorbilder finden!	4	E					4	Grün	ja	Berlin
Ernährung als soziales Event -> Spaß am Essen, Kochen… Z.B. über Medium Internet	4	D	E	M	N		2	Grün	ja	Berlin
Das Nützliche mit dem Angenehmen verbinden & Rituale schaffen; Gemeinschaft: Einkaufen, Beziehung/ Gespräch/ Austausch mit Händler/ Produzent/ untereinander; Zubereitung & Essen	4	B	E	M	N	P	2	Grün	ja	Berlin
Gemeinschaft	4	E					0	Grün	nein	Berlin
Arbeitszeit verkürzen, lebenslange Bildung / Lebenslanges Lernen fördern, z.B. zu Ernährungs- & Gesundheitsthemen (Lebenslanges Lernen für höhere Lebensqualität)	4	B	F	Q			4	Rot	ja	Berlin
Bedingungsloses Grundeinkommen („Gleiche“ Ausgangslage für Alle, Zeit sinnvoll & nach Begabung & Berufung einsetzen & genießen)	4	F					2	Rot	ja	Berlin
Keine Abholzung von Wäldern für Anbauflächen	4	G					1	Rot	ja	Berlin
Bauernmärkte zur Normalität werden lassen	4	A	G				1	Rot	nein	Berlin
Gesellschaftliches Umdenken erwirken (Politik, Lifestyle…)	4	E					1	Rot	nein	Berlin
Land für die Deckung des Eigenbedarfs der Bevölkerung sichern und erst dann den Rest verkaufen	4	F	G				1	Rot	nein	Berlin
Die Möglichkeit zu Essen zu Hause geben/ ausweiten	4	N					0	Rot	nein	Berlin
Werbung, wie bei Tabak auch, stärker leiten: Exotisches nicht attraktiver	4	D					0	Rot	nein	Berlin
Mehr Flächen pflichtmäßig offen lassen für alle, z.B. auch für Wildblumen	4	F					0	Rot	nein	Berlin
Öffentlicher Diskurs und Anerkennung der Notwendigkeit von Nachhaltigkeit	4	B	E				0	Rot	nein	Berlin
Aufklärung durch Fernsehreportagen	4	B					0	Rot	nein	Berlin
Zeitreichtum - neuer gesellschaftlicher Standard, geringere Wochenarbeitszeit (½ Arbeit/ ½ Geld = Zeit! für die wichtig & unwichtig scheinende Dinge)	4	Q					0	Rot	nein	Berlin
Keine Verschwendung -> Wiederverwertung (höchst mögliche); Ausnahmeklauseln ermöglichen z.B. Gesundheit/ Hygiene vs. Verpackungsmüll & Reste (Rechtliche Haftung aufheben; z.B. Resteverwertung, Verantwortung bei Nutzern; Bsp. Lebensmittel retten)	4	F					0	Rot	nein	Berlin
Siegel für konventionelle Produkte einführen, welches teurer ist als das Biosiegel	4	I					0	Rot	nein	Berlin
Bio-soft-Soap auf arte.tv/ YouTube anbieten	4	D	I				0	Rot	nein	Berlin
Gerade „Neueinsteigern“ aber auch langjährigen Bauern die Vorteile von biologischem Saatgut/ Nachhaltigkeit nahebringen (auch Aufgrund des Ausschöpfen ihrer Quellen)	4	B	G	I			0	Rot	nein	Berlin
Steuern unterschiedlich staffeln: -> Öko-Bauern durch niedrigere Steuern fördern und unterstützen -> konventionelle Bauern müssen extra Steuer entrichten, sodass es unrentabel wird	4	F	G	I			0	Rot	nein	Berlin
Schulische Aufklärung	4	B					0	Rot	nein	Berlin
Lebensmittel nicht zweckentfremden	4						0	Rot	nein	Berlin
Nahrungsmittelpreise auf „gesundem Niveau“ und Menschen aufklären (keine „falschen“ Subventionierungen)	4	F	H				0	Rot	nein	Berlin
Regional erzeugtes Essen wird im Job und anderswo in einem gemütlichen sozial animierenden Event gemeinsam genossen	4	E	J	N			0	Rot	nein	Berlin
Produkte (nachhaltige) subventionieren	4	F					0	Rot	nein	Berlin
Direktvermarktung in der Region	4	A	J				0	Rot	nein	Berlin
Auflistung süchtig machender Stoffe und gesundheitliche Auswirkung auf Verpackungen	4	B	C				0	Rot	nein	Berlin
Fixierung des Konsumenten von Discountern auf kleine, regionale Fachgeschäfte umlenken über gesteigerte Lobbyarbeit	4	A	D	E	J		0	Rot	nein	Berlin
Nicht teure, sondern kreative Erzeugnisse aus recyceltem Material werden in Lifestyle-Magazinen gefeiert	4	D					0	Rot	nein	Berlin
Verbot von Fast Food etc.	4	A	F				0	Rot	nein	Berlin
Ökolandbau über Massenmedien bewerben und zum Konsens machen	4	D	I				0	Rot	nein	Berlin
Nahrung „mit Liebe“ anbauen, damit sich Geschmack entwickelt	4	G					0	Rot	nein	Berlin
Konsumenten die Vielfältigkeit von Lebensmitteln aufzeigen -> Gewohnheiten brechen auch mit regionalen, saisonalen Angeboten	4	A	J	K			0	Rot	nein	Berlin
Zusammenarbeit zwischen Produzent und Konsument	4	E	G				0	Rot	nein	Berlin
Friedenssicherung, sodass kein Hunger / Armut entsteht	4	F					0	Rot	nein	Berlin
Aufklärung/ Bildung zu Nachhaltigkeit	4	B					0	Rot	nein	Berlin
Von klein auf die Wichtigkeit einer ausgewogenen Ernährung anprangern	4	B					0	Rot	nein	Berlin
Aufklärung an Schulen und Arbeitsplatz (Bewusstsein schaffen) und Umsetzung (Kantinen, lange Essenspausen etc.)	4	A	B				0	Rot	nein	Berlin
Auf künstliche, geschmacksverstärkende Zusatzstoffe verzichten/ sie verbieten	4	F					0	Rot	nein	Berlin
Jedem Menschen Raum für Eigenanbau zu Verfügung stellen (oder zumindest günstiger anbieten)	4	G					0	Rot	nein	Berlin
Subventionen für Ökolandbau, konventionellen Anbau besteuern	4	F	I				0	Rot	nein	Berlin
„Bio-Prämien“	4	F	I				3	Gelb	ja	Münster
Geringere Preisdifferenz zwischen Bio & Konventionell	4	H					4	Gelb	ja	Münster
Eigenanbau fördern	4	G					3	Gelb	ja	Münster
Leichtere Zugänglichkeit zum Erzeuger -> Höfe finden und besuchen können	4	A	G				3	Gelb	ja	Münster
„Ampelsystem“	4	B					3	Gelb	ja	Münster
Bildung in Schulen/ Kitas über Anbau und Herkunft	4	B					3	Gelb	ja	Münster
Staatliche Unterstützung	4	F					5	Gelb	ja	Münster
Weniger Verpackungen, ökologisch abbaubare Verpackungen entwickeln und auch verwenden im großen Stil -> Die Masse wird höhere Preise ausgleichen	4	S					2	Gelb	nein	Münster
Mehr Projekte wie „Urban Gardening“ oder „Essbare Stadt“	4	G	R				2	Gelb	nein	Münster
Verpackungsmüll reduzieren/ abbaubar gestalten	4	S					2	Gelb	nein	Münster
Angebot ändern	4	A					1	Gelb	nein	Münster
Aufklärung nicht nur in Deutschland	4	B					1	Gelb	nein	Münster
Bio-Einkauf zum Erlebnis machen	4	I	L				1	Gelb	nein	Münster
Leichtere Verfügbarkeit -> so einfach wie der Einkauf konventioneller Lebensmittel	4	A					0	Gelb	nein	Münster
Fertig zusammengestellte Boxen, ähnlich wie „Fresh-Box“	4	A					0	Gelb	nein	Münster
Supermärkte, in denen die Ernährungsform „integriert“ ist -> z.B. direkt passende Mengen in den Verpackungen	4	A	S				0	Gelb	nein	Münster
Größere Produktpalette -> Vergleichbare Auswahl an Produkten wie konventionell Produziertes	4	A					0	Gelb	nein	Münster
Bei Portionsgrößen (g) bspw. ein „Bild“ wieviel das etwa in der Realität ist -> nicht immer wiegen müssen, sondern „Augenmaß“	4	B					0	Gelb	nein	Münster
Im Einkaufsmarkt auf alternative kreative Gestaltungs-/ Transport- und Verarbeitungsideen aufmerksam machen	4	A	C				0	Gelb	nein	Münster
Größere Transparenz zur Preiszusammensetzung/ -gestaltung von Bio-LM	4	C	H	I			0	Gelb	nein	Münster
Zuckersteuer	4	F					0	Gelb	nein	Münster
„Tante Emma Läden“ nur regionale, saisonale, verpackungsarme Produkte	4	A	J	K	S		0	Gelb	nein	Münster
Keine eingepackten Bio-Lebensmitteln mehr (Obst/ Gemüse)	4	I	S				0	Gelb	nein	Münster
Weniger Subventionen für Tierhaltungsbetriebe	4	F					0	Gelb	nein	Münster
Auch verarbeitete Lebensmittel in Bio-Qualität -> Lebensmittelwirtschaft	4	I					0	Gelb	nein	Münster
Grundsätzlich Obst und Gemüse mit Rezeptzetteln verkaufen	4	A	B				0	Gelb	nein	Münster
Food-Sharing	4	A	E				0	Gelb	nein	Münster
Wege der Bio-Lebensmittel erkennbar (wie, was, wo, woher…)	4	B	C	I			0	Gelb	nein	Münster
Mehr Aufklärung (v.a. was ist schlecht an konventionell)	4	B					0	Gelb	nein	Münster
Lebensmittel müssten günstiger angeboten werden	4	H					0	Gelb	nein	Münster
Emotionalere Denkweisen	4						0	Gelb	nein	Münster
Möglichkeiten Informationen	4	B					0	Gelb	nein	Münster
Übersichtliche Kennzeichnung	4	B	C				0	Gelb	nein	Münster
Bessere Kennzeichnung der Lebensmittel	4	B	C				0	Gelb	nein	Münster
Mehr Infos über Herkunft,… LM	4	B	C				0	Gelb	nein	Münster
Bessere Verbraucheraufklärung	4	B					0	Gelb	nein	Münster
Präsentheit	4	A	D				0	Gelb	nein	Münster
Aufklärung	4	B					0	Gelb	nein	Münster
Mehr Aufklärung	4	B					0	Gelb	nein	Münster
Weniger weiter verarbeitete Produkte	4	A					0	Gelb	nein	Münster
To-go Angebote außerhalb von Biomärkten	4	A	I				0	Gelb	nein	Münster
„einfachere“ Bio-Lebensmittel als dieses viele „Dinkel- Chia- Tofu Smoothie“-Zeug	4	A					0	Gelb	nein	Münster
Infos über die Lage von Hofläden	4	A	B				0	Gelb	nein	Münster
100 % Verwertung	4						7	Orange	ja	Münster
Mehr Aufklärung schon in Schulen	4	B					7	Orange	ja	Münster
Gibt es wirklich gute Alternativen (lecker, einfach, günstig, genug) zu convenience Lebensmitteln?	4	A					2	Orange	ja	Münster
Bio Produkte ohne Verpackung	4	I	S				4	Orange	ja	Münster
Tierrechte verschärfen	4	F					4	Orange	ja	Münster
Bioeinkauf modernisieren	4	A	I				1	Orange	ja	Münster
Nur noch erneuerbare Energien	4	F					1	Orange	nein	Münster
Mehr Transparenz -> Inhaltsstoffe, Herkunft, ...	4	C					0	Orange	nein	Münster
Wie kann man den Teufelskreis von großer Nachfrage und Massetierhaltung unterbrechen	4						0	Orange	nein	Münster
Pluspunktesystem	4						0	Orange	nein	Münster
Aufklärung & Unterstützung	4	B					0	Orange	nein	Münster
Gemeinschaftliches Handeln	4	E					0	Orange	nein	Münster
Umweltschutz	4						0	Orange	nein	Münster
Bilder von Massentierhaltung auf der Verpackung	4	B	C	D			0	Orange	nein	Münster
Wie macht man der Gesamtgesellschaft (gerader der Jugend) bewusst, dass der Mensch ohne die Natur Garnichts herstellen kann	4	B					0	Orange	nein	Münster
Sensibilisierendes Bildungsniveau	4	B					0	Orange	nein	Münster
Online Bio-Einkauf	4	A	I				0	Orange	nein	Münster
Informationen digitalisieren	4	B	D				0	Orange	nein	Münster
Technologie im Supermarkt	4						0	Orange	nein	Münster
Demographischen Wandel beachten	4	E					0	Orange	nein	Münster
Keine Informationsflut!	4	B	D				0	Orange	nein	Münster
Scannen für mehr Information	4	B					0	Orange	nein	Münster
Transparenz erhöhen	4	C					0	Orange	nein	Münster
Disparitäten vermeiden durch Aufklärung	4	B					0	Orange	nein	Münster
Nachkriegsgeneration „Wertschätzung der Lebensmittel“	4	E	O				0	Orange	nein	Münster
„Früher war mehr Lametta“ - Eigenversorgung/ keine Reste	4	G					0	Orange	nein	Münster
Natur oder Gewächshäuser? Natürliche/ künstliche Lebensmittel	4	G					0	Orange	nein	Münster
Hilfe zur Selbsthilfe	4	E					0	Orange	nein	Münster
Respektvoller Umgang mit Ressourcen	4	O					0	Orange	nein	Münster
Urban Gardening	4	G	R				3	Blau	ja	Münster
Wie kann man Produktions- und Handelswege für den Verbraucher durchsichtiger gestalten (z.B. in Restaurants)	4	B	C	D			2	Blau	ja	Münster
Kurze Transportwege	4						2	Blau	ja	Münster
Kleinere Verpackungen (nachhaltig) für Singlehaushalte	4	S					3	Blau	ja	Münster
Verkauf vom Hof, ohne viele Prozessschritte	4	A	G				9	Blau	ja	Münster
Bio-Fertigprodukte und Bio-to go	4	A	I				1	Blau	ja	Münster
Nachhaltiger Lieferservice	4	A					0	Blau	nein	Münster
Toleranz von anderen Ernährungsformen	4	E					0	Blau	nein	Münster
Weitergabe von Infos/ Werten	4	B					0	Blau	nein	Münster
Mehr Bio in den Alltag einführen	4	A					0	Blau	nein	Münster
Jeden beim Kochen einbeziehen	4	E	M				0	Blau	nein	Münster
Überfluss vermeiden	4	A					0	Blau	nein	Münster
Transparenz	4	C					0	Blau	nein	Münster
Verschiedene Produktionswege	4	G					0	Blau	nein	Münster
Wie können Fast-Food-Unternehmen nachhaltiger werden?	4	A					0	Blau	nein	Münster
Kompromisse im Mehrgenerationenhaushalt	4	E					0	Blau	nein	Münster
Aufklärung und Bildung	4	B					8	Grün	ja	Münster
Verträge/ Konsequenzen	4	B					4	Grün	ja	Münster
Austausch (Rezepte, Infos, Zutaten, Erfahrungen)	4	B					1	Grün	ja	Münster
Food Sharing	4	A	E				3	Grün	ja	Münster
Biologischen Anbau erweitern und subventionieren	4	F	G	I			4	Grün	ja	Münster
Gemeinschaftsgefühl aufbauen/ erhalten -> Nachbarschaftshilfe	4	E					1	Grün	ja	Münster
Umsichtig Leben, sodass eine „Rote Liste“ nicht nötig ist (Artenschutz)	4	O					1	Grün	nein	Münster
Austausch von Wissen/ Erfahrungen/ Konsumgüter	4	B	E				0	Grün	nein	Münster
Aufklärung / Umsetzung von Infos & Weitergabe	4	B					0	Grün	nein	Münster
Wie kann man das Bewusstsein für die Ressourcenknappheit (Endlichkeit der Erde) schaffen?	4	O					0	Grün	nein	Münster
App zum Punkte sammeln für den richtigen Einkauf (bio)	4	D	I				0	Grün	nein	Münster
Zusammen bio kochen und essen	4	E	I	M	N		0	Grün	nein	Münster
Gemeinsame Durchsetzung (Familie)	4	E					0	Grün	nein	Münster
Aufklärungsaktionen z.B. in Zeitungen -> regelmäßig	4	B	D				0	Grün	nein	Münster
Wie kann man Vorurteile in der Gesellschaft durch Aufklärung beseitigen?	4	B	E				0	Grün	nein	Münster
Preis-Leistungs-Verhältnis	4	H					0	Grün	nein	Münster
Unterstützung im häuslichen Umfeld (z.B. Partner/ Beziehung)	4	E					0	Grün	nein	Münster
Wie kann man nachhaltige Verpackungsmöglichkeiten etablieren?	4	S					0	Grün	nein	Münster
Tauschen und Teilen von nachhaltigen Lebensmitteln	4	A	E				0	Grün	nein	Münster
Anlaufstellen für Hilfesuchende	4	E					0	Grün	nein	Münster
Anlaufstelle/ Homepage/ Telefonnummer	4	B	D	E			0	Grün	nein	Münster
Im Studium lernen nachhaltig zu Handeln	4	B					0	Grün	nein	Münster
Regionalen Einkauf fördern (Hofläden & Co)	4	J	L				4	Rot	ja	Münster
Bio-Anbau als einzige Lösung für die Welternährung	4	G	I				5	Rot	ja	Münster
Ressourcen nutzen	4						2	Rot	ja	Münster
Menschen bilden	4	B					2	Rot	ja	Münster
Aufklärung in Schulen	4	B					3	Rot	ja	Münster
Artgerechte Tierhaltung	4	G					3	Rot	ja	Münster
Achtsamkeit schulen	4	O					2	Rot	ja	Münster
Ausreichende Beleuchtung, keine Manipulation durch z.B. Medikamente/ Drogen	4	G					2	Rot	nein	Münster
Ausreichende finanzielle Mittel zur Verfügung stellen	4	F					2	Rot	nein	Münster
Unterstützung der Bio-Bauern	4	G	I				1	Rot	nein	Münster
Regionaler/ Saisonaler Anbau	4	G	J	K			1	Rot	nein	Münster
Ehrliche Produkte, vertrauenswürdige/ zuverlässige Labels	4	C					1	Rot	nein	Münster
Strafen für Bauern, wenn sie Pestizide und ähnliches einsetzen	4	F	G				1	Rot	nein	Münster
Bonuspunkte bei gesunder, nachhaltiger Ernährung	4	F					1	Rot	nein	Münster
Innovationsbonus für Unternehmen	4	F					1	Rot	nein	Münster
Auflagen für bestimmen Anbau (Limitationen)	4	F	G				0	Rot	nein	Münster
Freie Auswahl an Lebensmitteln	4	A					0	Rot	nein	Münster
Gezielte Auswahl im Supermarkt	4	A					0	Rot	nein	Münster
Keine Gentechnik	4	F	G				0	Rot	nein	Münster
Ausgewogene Ernährung! -> somit effektive Abnehmpille gar nicht nötig!	4						0	Rot	nein	Münster
Keine Großmärkte, Viele Bio-Läden	4	A	I				0	Rot	nein	Münster
Förderungen von verschiedenen Vereinen	4	E					0	Rot	nein	Münster
Biologische Produktvielfalt erweitern	4	A	I				0	Rot	nein	Münster
Große Auswahl an Produkten	4	A					0	Rot	nein	Münster
Bilder vom guten Öko-Landbau abbilden	4	B	D	I			0	Rot	nein	Münster
Erreichbarkeit/ Verfügbarkeit verbessern	4	A					0	Rot	nein	Münster
Überall Bio-Angebote	4	A	I				0	Rot	nein	Münster
Infektionsschutz erhöhen	4	F					0	Rot	nein	Münster
Nicht industriell gefertigte LM -> unverarbeitet z.B.	4	A					0	Rot	nein	Münster
Kein Einsatz mehr von synthetischen Düngemitteln	4	G					0	Rot	nein	Münster
Bio-Angebote an jeder Ecke	4	A	I				0	Rot	nein	Münster
Schärfere Produktions- & Qualitätskontrollen	4	F					0	Rot	nein	Münster
Böden schonend behandeln (wenig Dünger)	4	G					0	Rot	nein	Münster
Weiterbildung	4	B					0	Rot	nein	Münster
Vertrauen zu den Produzenten	4	E	G				0	Rot	nein	Münster
Gleichheit von Menschen/ Gesellschaften	4	E					0	Rot	nein	Münster
Einheitliche/ Standardisierte Kontrolle	4	F					0	Rot	nein	Münster
Gute Kommunikation weltweit	4	B					0	Rot	nein	Münster
Biomärkte fördern (subventionieren)	4	A	F	I			0	Rot	nein	Münster
Unterstützung bei Selbstanbau z.B. vom Staat -> Landflächen zur Verfügung stellen	4	F	G				0	Rot	nein	Münster
Mehr Unterstützung vom Staat	4	F					0	Rot	nein	Münster
Keine Verwendung von Pestiziden/ Antibiotika	4	G					0	Rot	nein	Münster
Keine Hormone bei Tierhaltung	4	G					0	Rot	nein	Münster
Kurze Produktions- und Transportwege	4	G					0	Rot	nein	Münster
Pillen, die zur Ergänzung der Ernährung dienen	4						0	Rot	nein	Münster
Freie Entscheidungen ermöglichen/ zulassen	4	E					0	Rot	nein	Münster
Verbreitung von Bio-Märkten und co.	4	A	I				0	Rot	nein	Münster
Menschen in ihrem Wissen und ihren Werten bestätigen	4	B					0	Rot	nein	Münster
Ökobauern unterstützen	4	G	I				0	Rot	nein	Münster
Herkunft auf die Lebensmittel drucken	4	C					0	Rot	nein	Münster
Lebensmittelproduktion erfahrbarer machen	4	G					2	Gelb	ja	Freiburg
Informationen auf/ an Produkten: CO2/ Gemeinwohl/ Bodenfruchtbarkeit etc.	4	B	C				2	Gelb	ja	Freiburg
Vernetzung zwischen Ökolandwirten und Konsumenten ausbauen	4	E	G	I			3	Gelb	ja	Freiburg
„Handlungspädagogik“ in Landwirtschaft/ Gartenbau für alle Altersstrukturen	4	B					2	Gelb	ja	Freiburg
Steuern für Bodenabbau und Umweltschädigungen in Landwirtschaft und Boni für Boden-Aufbau, Landwirtschafts-Regeneration	4	F	G				1	Gelb	nein	Freiburg
Eltern, Lehrer/innen, Politik, Unternehmer müssen sich vorbildlich verhalten	4	B	E	F			1	Gelb	nein	Freiburg
Preisdruck für Produzent/innen angehen ( sollten auch von biologischer Produktion leben können ohne viele Schwierigkeiten)	4	G	H				1	Gelb	nein	Freiburg
Viele kleine überschaubare Projekte initiieren und unterstützen: Think global, act local	4	E					1	Gelb	nein	Freiburg
Food-Kooperativen	4	A	E				1	Gelb	nein	Freiburg
Neuen Trend „entstehen“ lassen: „Real Green“	4	D					1	Gelb	nein	Freiburg
Emotionale Bindung zur Natur fördern -> Bildungsbereich	4	B					1	Gelb	nein	Freiburg
Politische Rahmenbedingungen ändern. „Besserstellung“ von nachhaltigen Produkten/ Sanktionen für nicht nachhaltige Produkte. „Preise anpassen“	4	F					1	Gelb	nein	Freiburg
Feste Preise für Zukunftsfähige Lebensmittelerzeugung	4	G	H				1	Gelb	nein	Freiburg
Kinder erreichen Eltern und Großeltern	4	B	E				0	Gelb	nein	Freiburg
In Kindergärten: für Natur begeistern	4	B					0	Gelb	nein	Freiburg
In Schulunterricht: Lebensgrundlagen	4	B					0	Gelb	nein	Freiburg
Erlebnisbauernhof	4	B	G				0	Gelb	nein	Freiburg
Produktionsteile in die Stadt bringen z.B. Kulturacker	4	G	R				0	Gelb	nein	Freiburg
Stärkung von Landwirten von allen gesellschaftlichen Bereichen (Staat, Konsument, Wirtschaft) für biologische Produktion	4	E	F	G	I		0	Gelb	nein	Freiburg
Wertewandel: Landwirtschaft für das Mittel zum Leben verstehen anstatt wie Industriesektor	4	G					0	Gelb	nein	Freiburg
Kommunikation und Verständnis	4	E					0	Gelb	nein	Freiburg
Prekäre Lebenssituationen verringern	4	F					0	Gelb	nein	Freiburg
Hilfestellungen bei der Komplexität von Konsumentscheidungen aus unabhängigen Quellen (!) entwickeln, präsenter/ attraktiver machen	4	B					0	Gelb	nein	Freiburg
Möglichkeit entwickeln den CO2-Abdruck/ sozialen Impact von Produkten zu beziffern und diesen Wert dem Produkt zuordnen -> Transparenz	4	B	C				0	Gelb	nein	Freiburg
Ein Mix aus Steuerungselementen anwenden: Von Labeling über klare Vorgaben von Entscheidungsträger über partizipiere Landwirtschaft -> schafft Infrastruktur für ein erfolgreiches Umsetzen des Wissens/ Werte oder ggf. sogar ohne entsprechendes Wissen/ Bewusstsein	4	E	F	G			0	Gelb	nein	Freiburg
Verschiedene Gruppen ansprechen! Verbände, Gewerkschaften, Firmen und auf deren Bedürfnisse eingehen! (Ernst nehmen!!)	4	E					0	Gelb	nein	Freiburg
Neue Medien nutzen	4	D					0	Gelb	nein	Freiburg
Bildung: positive Erfahrungen schaffen, um Interesse und Wertschätzung zu wecken. Z.B. Projekte in Schulen, außerschulischen Lernorten	4	B	O				0	Gelb	nein	Freiburg
Kombination aus Kultur, Technik, nachhaltiger Lebensmittelproduktion	4	P					0	Gelb	nein	Freiburg
Mehr Transparenz über Inhaltstoffe von Waren – verständlichere Deklarierung	4	C					0	Gelb	nein	Freiburg
Finanzielle Sicherheit für Geringverdiener schaffen -> „Preis entscheidet“	4	F	H				0	Gelb	nein	Freiburg
Menschen mehr in Produktions-, Recycling- und Entsorgungskette einbinden - > Bezug zur Nahrung, Verantwortung für Handlung	4	E					0	Gelb	nein	Freiburg
Verbindliche Abnahme von Ware (z.B. Biokiste) (Weniger Müll, weniger Überangebot, direkt „gute“ Ware, Entscheidung wird nicht jedes Mal neu getroffen	4	A	I				0	Gelb	nein	Freiburg
Noch mehr „Kontaktflächen“ für Bewusstseinsbildung schaffen	4	O					0	Gelb	nein	Freiburg
Initiativen, die es bereits gibt vernetzen (für Austausch, Ideen, Kommunikation, Synergien)	4	E					0	Gelb	nein	Freiburg
Öffentliche/ halböffentliche Nahrungsbereitsteller stärker in Verantwortung nehmen, z.B. Mensen, Kantinen, etc.	4	A					0	Gelb	nein	Freiburg
Macht der Werbung -> für positive/ nachhaltige Produkte nutzen	4	D					0	Gelb	nein	Freiburg
Gesetzgebung!	4	F					0	Gelb	nein	Freiburg
Entsprechende Gestaltung von Subventionen (Förderung von kleinbäuerlichem Bio- Anbau mit regionaler Vermarktung)	4	F	G	I	J		0	Gelb	nein	Freiburg
Thematisch viel stärker in die Schulen bringen, vor allem über „praktische“ Erfahrungen/ Erlebnisse	4	B					0	Gelb	nein	Freiburg
Kindern den „Wert“ von Natur nahebringen -> schützenswert	4	B					0	Gelb	nein	Freiburg
Weniger Angebot	4	A					0	Gelb	nein	Freiburg
Natürliche N-Reserven nutzbar machen, N- Düngereinsatz reduzieren (Methan, Lachgas)	4	G					0	Gelb	nein	Freiburg
Erholungsparks, Natur mit Gruppenführungsangeboten	4	B					0	Gelb	nein	Freiburg
Bodenschutz!!! Auch von Bodenleben!	4	G					0	Gelb	nein	Freiburg
Verpflichtung aller Landwirte zur Pflanzung von 5-10 % Bäume pro Hektar	4	G					0	Gelb	nein	Freiburg
Staatlich finanzielle Wertschätzung für Nachbarschaftshilfe (Verdienstausfall)	4	F	E				0	Gelb	nein	Freiburg
Mehr Anerkennung und Lohn für soziale Berufe und Landwirtschaft	4	F	E				0	Gelb	nein	Freiburg
Obergrenze Hektar für Landwirtschaftliche Betriebe (Überproduktion und Preisverfall)	4	F	G				0	Gelb	nein	Freiburg
Ende der Flächensubvention (Profit nur für Großfarmen)	4	F	G				0	Gelb	nein	Freiburg
Kooperation beider Seiten für Lebensmittelanbau und Naturschutz	4	E	G				0	Gelb	nein	Freiburg
Solidarischer Landwirtschaftsformen fördern und mitmachen	4	E	G				3	Orange	ja	Freiburg
Mehr Schulbesuche in landwirtschaftlichen Betrieben	4	B	G				1	Orange	ja	Freiburg
Gemeinschaft stärken (Verantwortung füreinander, Stärkung von Werten, Zugehörigkeitsgefühlen)	4	E					3	Orange	ja	Freiburg
Verbot Ausfuhr (Export) billiger Lebensmittel(-reste) die Kleinbauern in Dritte-Welt-Ländern Existenz nehmen	4	F	G				3	Orange	ja	Freiburg
Positiv-„Schlagzeilen“ über bereits Erreichtes. Motivieren!	4	D					4	Orange	ja	Freiburg
Verpackungsfreie Läden	4	A	S				1	Orange	ja	Freiburg
Transport von Kleinbauern an den Konsumenten organisieren	4	A	G	E			1	Orange	nein	Freiburg
Poesie und Kunst als Vermittler	4	B	D				1	Orange	nein	Freiburg
Kochrezepte entwickeln, die möglichst wenig Verpackung/ Zutaten etc. verbrauchen	4	B	M	S			1	Orange	nein	Freiburg
Mehr staatliche Gelder für Pflanzenschutzmittel-unabhängige Forschung	4	F					0	Orange	nein	Freiburg
Ursachen beheben, statt Schaderreger bekämpfen!	4	G					0	Orange	nein	Freiburg
Förderung Buchen-Mischwälder für stabile, saubere Trinkwasserbestände	4	F					0	Orange	nein	Freiburg
Nachhaltigkeitsbegriff definieren und durch Kriterien messbar machen (Greenwashing vermeiden)	4	B	F				0	Orange	nein	Freiburg
Kleine Veränderungen wertschätzen!	4	O					0	Orange	nein	Freiburg
Vorträge/ Workshops „Was sind Grundlagen, die wir wirklich brauchen?“	4	B					0	Orange	nein	Freiburg
Bessere pädagogische Ausbildung für Lehrer (gutes Miteinander der Schüler)	4	B	E				0	Orange	nein	Freiburg
Führerschein (PKW) – Verlust bei Nichtteilnahme regelmäßiger Klimavorträge (alle 3-4 Jahre)	4	F	B				0	Orange	nein	Freiburg
Gemeinschaftliches Kochen organisieren, bei dem der Wert guter Lebensmittel geschätzt wird	4	E	M				0	Orange	nein	Freiburg
Wertschätzung	4	O					0	Orange	nein	Freiburg
Faire Gesetzeslage: z.B. „Hühnerkuscheln“ verboten. Kleinbäuerlich/ Bio-Strukturen fördern	4	F	G	I			0	Orange	nein	Freiburg
Verpackungsfreie Läden mit regionalen und Bio-Produkten	4	A	I	J	S		0	Orange	nein	Freiburg
Meditation in Schule und Beruf	4	O					0	Orange	nein	Freiburg
Schon getestete Strategien evaluieren aus Vergangenheit lernen und sich weiterentwickeln	4	B					0	Orange	nein	Freiburg
Die Gesetzmäßigkeit der Natur ernst nehmen	4	O					0	Orange	nein	Freiburg
Naturgewalt als Energieträger nutzen	4						0	Orange	nein	Freiburg
Sorgsam in Gemeinschaft aus Lebenserfahrung gesunde Lebenswege gestalten	4	B	E				0	Orange	nein	Freiburg
Wir entscheiden wo und wie es in die Zukunft geht!	4	E					0	Orange	nein	Freiburg
Gerechtere Verteilung von Ressourcen durch Beschränkung und Verfügbarmachen	4	A	E				0	Orange	nein	Freiburg
Angepasste Nutzung der „sozialen Medien“	4	D					0	Orange	nein	Freiburg
Viele Tropfen ergeben einen Ozean -> gemeinsam sind wir stark	4	E					0	Orange	nein	Freiburg
Gemeinwohlbilanz	4	E					0	Orange	nein	Freiburg
Information über soziale Netzwerke, Apps, andere Medien	4	B	D				0	Orange	nein	Freiburg
Solidarische Landwirtschaft	4	E	G				0	Orange	nein	Freiburg
Grenzen wahrnehmen -> Veränderungen im Klima	4	O					0	Orange	nein	Freiburg
Back to the roots -> Subsistenz	4						0	Orange	nein	Freiburg
Entschleunigung der Gesellschaft -> Mehr Achtsamkeit für das Umfeld	4	O	Q				0	Orange	nein	Freiburg
Einkaufsläden ohne Verpackung	4	A	S				1	Blau	ja	Freiburg
Trennung von Produzent/in und Konsument/in aufheben	4	E	G				4	Blau	ja	Freiburg
Obstkörbe für Büros (regional & saisonal)	4	A	J	K			1	Blau	ja	Freiburg
Exkursionen „Hinter die Kulissen schauen“ (z.B. was passiert mit Biomüll, wie wird der Markt beliefert?) für Stadtteile/ Quartiere	4	B	R				3	Blau	ja	Freiburg
Energie sparen beim Kochen für Viele	4	M					1	Blau	ja	Freiburg
Integrierte Produktion/ Verarbeitung in der Stadt z.B.: Urban Gardening, Kulturacker	4	E	G	R			5	Blau	ja	Freiburg
Mehr Zeitressourcen für Menschen schaffen	4	Q					6	Blau	ja	Freiburg
Unternehmen bieten Bio-Lebensmittel in der Verpflegung an	4	A	I				1	Blau	ja	Freiburg
Gruppen, die gemeinsam zu den Erzeugern fahren	4	B	E	G			1	Blau	nein	Freiburg
Gemeinsames Ernten mit „Arbeit“ dem Erzeuger Dienstleistung <-> Erzeugnis	4	E	G				0	Blau	nein	Freiburg
Gesundes Fast Food	4	A					0	Blau	nein	Freiburg
Bio-Fast Food Läden	4	A	I				0	Blau	nein	Freiburg
Kräuter-/ Beeren-/ Waldspaziergänge: „Was bietet der Wald Essbares?“	4	B	E				0	Blau	nein	Freiburg
Austausch über das Essen/ Kochen (Werte, Bildung)	4	B	E	M	N		0	Blau	nein	Freiburg
Regionale Produktion unterstützen: „Frisches“ vom Markt holen	4	A	G	J			0	Blau	nein	Freiburg
Erfahrbar machen von Landwirtschaft -> Wertschätzung	4	G	O				0	Blau	nein	Freiburg
Naturschutztreffen bei Picknick und Lagerfeuer im Grünen (Gleichgesinnte treffen)	4	E					0	Blau	nein	Freiburg
Alte Rezepturen verwenden -> Landküche	4	M					0	Blau	nein	Freiburg
Vernetzung bestehender Initiativen	4	E					1	Grün	ja	Freiburg
Treffpunkt für Ideen von Initiativen. Gleichgesinnte, die etwas umsetzen möchten. Beratung zur Unterstützung von Start-up´s bieten	4	E					3	Grün	ja	Freiburg
Bildungsexkursionen: Neben Spaß, Sprach- und Kulturaustausch gezielt Klimaherausforderungen für die Ernährung erfahren und Lösungen in anderen Regionen und Ländern kennenlernen.	4	E	J	P			1	Grün	ja	Freiburg
Staatliche finanzielle Anreize schaffen für nachhaltige Produktion	4	F	G				3	Grün	ja	Freiburg
Evtl. neue Einsatzmöglichkeiten für „Unkraut“ (-> Unkraut als Ressource)	4						2	Grün	ja	Freiburg
Staatliche Förderung für vielfältige und kleinteilige Landwirtschaft -> preisliche Attraktivität	4	F	G				3	Grün	ja	Freiburg
Einbindung in Landwirtschaft durch räumliche Nähe (Gemüse in der Stadt) -> Verbundenheit	4	G	R				3	Grün	ja	Freiburg
Ausdifferenzierte Bildungslandschaft (Meinungsbildung, Information, Verbundenheit durch Erfahrungen)	4	B					1	Grün	nein	Freiburg
Verpackungsfreie Lebensmittel	4	S					1	Grün	nein	Freiburg
Dienstleistungen bei Erzeuger (Bauer etc.) als Alternativ-Währung (teilweise)	4	G	H				1	Grün	nein	Freiburg
Breite Werbung für nachhaltigen Konsum	4	D					0	Grün	nein	Freiburg
Ansprechen verschiedener Zielgruppen durch unterschiedliche Methoden und Themen	4	B	D				0	Grün	nein	Freiburg
Umbenennung von Unkraut -> Beikräuter	4						0	Grün	nein	Freiburg
Empathie für Landwirte schaffen	4	E	G	O			0	Grün	nein	Freiburg
Ressourcen schonen für Art und Weise der Lebensmittelherstellung	4	G					0	Grün	nein	Freiburg
Austausch von Praxiserfahrung zwischen Erzeuger/ Konsument <-> Konsument/ Erzeuger	4	B	E	G			0	Grün	nein	Freiburg
Bürger zu mehr Offenheit bezüglich regionaler Landwirtschaft bewegen	4	E	G	J			0	Grün	nein	Freiburg
Nachbarschaftskooperationen Raum und Struktur geben	4	E					0	Grün	nein	Freiburg
Werbung für nachhaltig hergestellte Produkte	4	D					1	Rot	ja	Freiburg
Begrenzung für Betriebsgrößen	4	F	G				2	Rot	ja	Freiburg
Herstellungsmethoden transparent machen (gläserne Produktion, Hofläden, Internetplattformen, Apps, Mitarbeiten auf dem Hof als „Fitnessstudio im Freien“)	4	C	D	G			1	Rot	ja	Freiburg
Soziales Lernen von klein auf	4	B					2	Rot	ja	Freiburg
Erlöse für Produzent/innen erhöhen -> Preis sollte bei Produzent/innen ankommen	4	G					1	Rot	ja	Freiburg
Landvergabe nach sozialen Aspekten	4	G					3	Rot	ja	Freiburg
Viele kleine, regionale Lebensmittelhersteller	4	G	J				2	Rot	ja	Freiburg
Labeling für qualitative Lebensmittel	4	C					1	Rot	nein	Freiburg
Ausreichende Produktion von „guten“ Lebensmitteln in allen Regionen	4	G	J				1	Rot	nein	Freiburg
Glyphosatverbot	4	F					1	Rot	nein	Freiburg
Kleine Lebensmittelgeschäfte sollen gefördert werden -> breite Streuung	4	A					1	Rot	nein	Freiburg
Dezentralisierung der Lebensmittelproduktion -> Viele kleine lokale Unternehmen (gib Multikonzernen keine Chance)	4	A	G				1	Rot	nein	Freiburg
Umweltauflagen um Bodenfruchtbarkeit und Wasserqualität zu erhalten	4	F					1	Rot	nein	Freiburg
Vorschriften für Transparenz und Nachvollziehbarkeit	4	C	F				1	Rot	nein	Freiburg
Vielfältiges Angebot an Lebensmitteln	4	A					0	Rot	nein	Freiburg
Wissenstransfer von Information zu Inhalt und Produktion der Lebensmittel in allen Gesellschaftsschichten	4	B	E				0	Rot	nein	Freiburg
Subvention von Kleinbauern	4	F	G				0	Rot	nein	Freiburg
Saatgutvielfalt erhalten und erlauben/ fördern	4	F	G				0	Rot	nein	Freiburg
Vermarktung von überproduzierten Produkten innerhalb eines Radius von 500 km	4	A					0	Rot	nein	Freiburg
Das Thema „Ernährung“ in Medien stärker verbreiten	4	D					0	Rot	nein	Freiburg
Verbot von Landgrabbing -> Land für Subsistenzlandwirtschaft	4	F					0	Rot	nein	Freiburg
Kennzeichnungspflicht	4	F	C				0	Rot	nein	Freiburg
Preisstabilität/ -sicherheit schaffen	4	H					0	Rot	nein	Freiburg
Zertifizierung von Bioprodukten und Kontrolle, Verbot von Pseudo-Zertifizierung	4	F	I				0	Rot	nein	Freiburg
Bio-Subventionen	4	F	I				0	Rot	nein	Freiburg
Zusammensetzung einzelner Zutaten und deren Wirkung verstehen lernen für eine ausgewogene Ernährung z.B. Ayurveda	4	B					0	Rot	nein	Freiburg
Pflanzenschutzmittel ganzheitlich untersuchen	4	B					0	Rot	nein	Freiburg
Bürokratie reduzieren	4	F					0	Rot	nein	Freiburg
Transparente und faktentreue Berichterstattung mit wissenschaftlicher Grundlage	4	B	C	D			0	Rot	nein	Freiburg
Besseren Zugang zu Land für Kleinbauern	4	G					0	Rot	nein	Freiburg

## Sheet: Daten_Punkte-Ranking_Top25
Idee	Deduktive Codierung	Induktive Codierung					Punkte	Farbe	Favoritverwendung	Ort
Bewusst und ressourcenschonend konsumieren/ leben	2	L	N	O			11	Grün	ja	Münster
Verkauf vom Hof, ohne viele Prozessschritte	4	A	G				9	Blau	ja	Münster
Mehr verpackungsfreie Lebensmittelläden	3	A	S				8	Blau	ja	Münster
Aufklärung und Bildung	4	B					8	Grün	ja	Münster
Wert-/ werbungsfreie Lebensmittel (Bewertung nur nach Inhalt, z.B. „mit x % Fruchtanteil“ anstatt „mit hohem Anteil an …“	4	D					7	Grün	ja	Dortmund
Verbraucher besuchen Bauernhöfe und sprechen über Tierhaltung, Düngung usw.	4	B					7	Grün	ja	Dortmund
Ernährung als Unterrichtsfach (Kochen, Gartenarbeit...)	4	B					7	Grün	ja	Hamburg
100 % Verwertung	4						7	Orange	ja	Münster
Mehr Aufklärung schon in Schulen	4	B					7	Orange	ja	Münster
Eine Produktdatenbank, die die wahren Kosten (Ressourcenverbrauch etc.) einpreist (z.B. Wurst Aldi 0,69€ -> Erdwahre Kosten 2,69 €)	3	B	C	H			6	Orange	ja	Hamburg
Lebensmittelpreise müssen die Gesamtkosten darstellen	3	H					6	Rot	ja	Hamburg
Massentierhaltung verbieten (plus neue strengere Düngemittelverordnung)	4	F					6	Rot	ja	Dortmund
Mehr Zeitressourcen für Menschen schaffen	4	Q					6	Blau	ja	Freiburg
Preise für Lebensmittel müssen die Vollkosten abbilden	3	H					5	Orange	ja	Dortmund
Höherer Steuersatz für Tierisches und Ungesundes. Niedrigere für pflanzliche und gesunde Lebensmittel	3	F					5	Rot	ja	Kassel-Witzenhausen
Belohnungssysteme für nachhaltige Ernährung schaffen	3						5	Gelb	ja	Hamburg
Infrastruktur für Nachhaltige Strategien schaffen (z.B. für Nachbarschaftskooperation) Rechtliche Vereinfachungen z.B. für (Food)Sharingpoints; Einkaufsgemeinschaften, Stelle/ Arbeitsplatz schaffen, der die Infrastruktur pflegt, Arbeiten ausführt	3	E	F				5	Grün	ja	Freiburg
Nachhaltigkeitspartys analog „Tupperware“	4	D					5	Blau	ja	Dortmund
Ökologischen Fußabdruck auf dem Produkt verzeichnen	4	C					5	Orange	ja	Kassel-Witzenhausen
Verantwortungsvolle Schulverpflegung – Lerneffekt der Kinder	4	A	B				5	Blau	ja	Hamburg
Lobbyismus in Agrar- und Lebensmittelindustrie sehr streng regeln bzw. verbieten	4	F					5	Rot	ja	Hamburg
Nachhaltigkeit „spürbar“ machen – Preis?	4	H					5	Orange	ja	Berlin
Staatliche Unterstützung	4	F					5	Gelb	ja	Münster
Bio-Anbau als einzige Lösung für die Welternährung	4	G	I				5	Rot	ja	Münster
Integrierte Produktion/ Verarbeitung in der Stadt z.B.: Urban Gardening, Kulturacker	4	E	G	R			5	Blau	ja	Freiburg
Kleinigkeiten umsetzen -> am Anfang nicht den Anspruch haben, alles richtig machen zu müssen	2						4	Gelb	ja	Dortmund
Schließen der Lücke zwischen Zeit- und Geldressourcen	2	Q	H				4	Blau	ja	Dortmund
Persönlichen Bezug zum Lebensmittel herstellen. -Herstellung /Produktion -Art der Essensaufnahme, z.B. händisch	2						4	Blau	ja	Kassel-Witzenhausen
Bei sich selbst anfangen -> eigenes Umfeld ->...	2						4	Orange	ja	Freiburg
Steuern auf „ungesunde“, nicht ökologische Nahrungsmittel	3	F					4	Rot	ja	Dortmund
Bildung (was Ernährung/ Nachhaltigkeit, etc.) angeht in Schulen, Kitas, Arbeitsämtern, Universitäten, VHS...	3	B					4	Orange	ja	Kassel-Witzenhausen
Imbissbuden mit mehr pflanzlich/ saisonal/ regionalen Angeboten	3	A	J	K			4	Blau	ja	Kassel-Witzenhausen
„Früh“- Aufklärung -> in Bildungssystemen (Kitas, Schulen, ...)	4	B					4	Gelb	ja	Dortmund
Externe Kosten internalisieren	4	F	H				4	Gelb	ja	Kassel-Witzenhausen
Anreize (monetär) für Müllentsorgung/ Recycling schaffen	4						4	Grün	ja	Kassel-Witzenhausen
Kommunen -> Feste/ Märkte: Probieren von alten Sorten. Themenbezogene Stände, Infos, Spiele, Rezepte	4	B	D				4	Grün	ja	Kassel-Witzenhausen
Umweltkosten in Produktkosten einbeziehen	4	H					4	Rot	ja	Kassel-Witzenhausen
Offenlegung zu Produktionsweisen, Transportwege, Inhaltsstoffe -> durch Gesetz geben	4	C	F				4	Blau	ja	Hamburg
Herkunft der Produkte. Es sollte nicht nötig sein, immer alles zu kriegen! Saisonalität, Regionalität!	4	A	J	K			4	Orange	ja	Berlin
Mehr Zeit für Ernährung; pers.: wie viel muss ich arbeiten?; gesellschaftliche Strukturen schaffen für Neubewegung von „Erfolg“ -> Facettenreich	4	Q					4	Blau	ja	Berlin
Nachhaltigkeit in einer Gruppe (z.B. Familie, Schule, Freunde) als Norm vermitteln -> Vorbilder finden!	4	E					4	Grün	ja	Berlin
Arbeitszeit verkürzen, lebenslange Bildung / Lebenslanges Lernen fördern, z.B. zu Ernährungs- & Gesundheitsthemen (Lebenslanges Lernen für höhere Lebensqualität)	4	B	F	Q			4	Rot	ja	Berlin
Geringere Preisdifferenz zwischen Bio & Konventionell	4	H					4	Gelb	ja	Münster
Bio Produkte ohne Verpackung	4	I	S				4	Orange	ja	Münster
Tierrechte verschärfen	4	F					4	Orange	ja	Münster
Verträge/ Konsequenzen	4	B					4	Grün	ja	Münster
Biologischen Anbau erweitern und subventionieren	4	F	G	I			4	Grün	ja	Münster
Regionalen Einkauf fördern (Hofläden & Co)	4	J	L				4	Rot	ja	Münster
Positiv-„Schlagzeilen“ über bereits Erreichtes. Motivieren!	4	D					4	Orange	ja	Freiburg
Trennung von Produzent/in und Konsument/in aufheben	4	E	G				4	Blau	ja	Freiburg
Wie können frühere Ernährungsformen helfen nachhaltiger zu handeln?	0						3	Orange	ja	Münster
Ernährung selbst erfahren – wo kommen Äpfel her, woraus besteht mein Frühstücksaufschnitt?	1	B					3	Gelb	ja	Dortmund
Lebensmittel vor Ort beziehen, z.B. Solawis, Landwirte, Bioläden, selbst Gärtnern, Gemüseparzellen, alten Obstbaumbestand (öffentlich) nutzen (an Wegesrändern)	1	A	I	L			3	Orange	ja	Kassel-Witzenhausen
Zeit (genügend) zum Essen an der Arbeit/ Schule/ Uni einplanen	1	N	Q				3	Blau	ja	Kassel-Witzenhausen
Individuellen Nutzen nachhaltiger Ernährung herausstellen	1	O					3	Grün	ja	Kassel-Witzenhausen
Betroffenheit löst Handlungsbedarf aus -> Beschäftigung mit Themen anregen	2	O					3	Blau	ja	Dortmund
Kulturelle Unterschiede bzgl. Ernährung kennenlernen, ausprobieren, erfragen (Kochbuch der Nationen)	2	B	P				3	Grün	ja	Dortmund
Fragen stellen dürfen -> konkrete Antworten finden. Nicht um die „Schattenseite“ zu definieren sondern um das Gute zu finden; dann entscheiden	2	B					3	Grün	ja	Dortmund
Verantwortung übernehmen	2						3	Grün	ja	Kassel-Witzenhausen
Integration von Sport und gesunden Lebensmitteln in den Arbeitsalltag	2						3	Gelb	ja	Hamburg
Förderung nachhaltiger Gastronomie	3	A					3	Blau	ja	Dortmund
Marktstand eines regionalen Anbieters im Wohnviertel	3	A	J	R			3	Rot	ja	Dortmund
Lebensmittel in sich selbst verpacken z.B. Tomaten in „Grünabfällen“, die kompostierbar sind	3	S					3	Orange	ja	Kassel-Witzenhausen
Neue pädagogische Konzepte z.B. vegetarisches Essen/ Bio- Fleisch in Schulen, Mensen, Kantinen -> Schaukochen in Fußgängerzonen, Bildung in Schulen, Kindergärten, Kitas	3	A	B	I	M		3	Grün	ja	Kassel-Witzenhausen
Promis als Werbeträger für nachhaltige Ernährung (Vorbilder)	3	D					3	Rot	ja	Kassel-Witzenhausen
Gesetzliche Umgestaltung der Ernährungsversorgung im Sinne der Menschenrechte (Zugang, Gleichheit, Gleichwertigkeit, Ausbeutung stoppen,…); Asoziale Marktwirtschaft in die Schranken weisen	3	F					3	Orange	ja	Berlin
Sehr niedrige Preise für Bio-LM -> Subventionen vom Staat	3	F	H	I			3	Rot	ja	Münster
Allgemeinwissen und Erfahrungen über Lebensmittel schaffen in Schulen, Küchen, Gesundheitszentren, Land und Stadt, z.B. Ernährungsbildung als „muss“	3	B					3	Gelb	ja	Freiburg
Kennzeichnungspflichten (lokal, bio, vegan, saisonal)	4	C	F	I	J	K	3	Gelb	ja	Dortmund
Peer-Groups bilden -> gemeinsames Einkaufen & Kochen	4	E	L	M			3	Gelb	ja	Dortmund
Schule : Fach Nachhaltigkeit	4	B					3	Orange	ja	Dortmund
Man muss Konsequenzen erfahrbar machen	4						3	Orange	ja	Dortmund
Wertschätzung für Lebensmittel stärken	4	B	D	O			3	Orange	ja	Dortmund
Umweltbildung als Schulfach	4	B					3	Orange	ja	Dortmund
Flächen für urbanes Gärtnern	4	G	R				3	Blau	ja	Dortmund
Transparenz erzeugen, Spiegel vorhalten	4	C					3	Grün	ja	Dortmund
Bezahlbarkeit des „echten Produktpreises“ (Vollkosten) sicherstellen	4	H					3	Rot	ja	Dortmund
Der wahre Wert der Ware -> faire Marktbedingungen schaffen -> Regional (Arbeitsplätze)	4	H	J				3	Rot	ja	Dortmund
Mehr solidarische Landwirtschaft	4	E	G				3	Gelb	ja	Kassel-Witzenhausen
Die Selbstversorgung sollte gefördert werden, damit die Verbindung zwischen Tier/ Pflanze und Mensch intensiver und nachvollziehbar wird	4	G					3	Gelb	ja	Kassel-Witzenhausen
Landwirtschaft in Lehrplan integrieren -> Lebensmittelproduktion und gesundheitsbezogene Aspekte	4	B	G				3	Blau	ja	Kassel-Witzenhausen
Verpackungsarme Läden (-> Selbstabfüllung)	4	A	S				3	Orange	ja	Hamburg
Einen Ernährungsausschuss in der Stadtverwaltung etablieren	4	F	R				3	Grün	ja	Hamburg
Mit Hilfe von Edukation Werte vermitteln und das Erreichen von Zielen erleichtern	4	B					3	Grün	ja	Hamburg
Kollektive Rituale zur Wertschätzung von Essen einführen (gemeinsames Kochen, Erntedank-Feste etc.)	4	E	N	O	P		3	Blau	ja	Berlin
Zugang zu Land für Eigenanbau/ Gemeinschaftsanbau	4	G					3	Blau	ja	Berlin
„Bio-Prämien“	4	F	I				3	Gelb	ja	Münster
Eigenanbau fördern	4	G					3	Gelb	ja	Münster
Leichtere Zugänglichkeit zum Erzeuger -> Höfe finden und besuchen können	4	A	G				3	Gelb	ja	Münster
„Ampelsystem“	4	B					3	Gelb	ja	Münster
Bildung in Schulen/ Kitas über Anbau und Herkunft	4	B					3	Gelb	ja	Münster
Urban Gardening	4	G	R				3	Blau	ja	Münster
Kleinere Verpackungen (nachhaltig) für Singlehaushalte	4	S					3	Blau	ja	Münster
Food Sharing	4	A	E				3	Grün	ja	Münster
Aufklärung in Schulen	4	B					3	Rot	ja	Münster
Artgerechte Tierhaltung	4	G					3	Rot	ja	Münster
Vernetzung zwischen Ökolandwirten und Konsumenten ausbauen	4	E	G	I			3	Gelb	ja	Freiburg
Solidarischer Landwirtschaftsformen fördern und mitmachen	4	E	G				3	Orange	ja	Freiburg
Gemeinschaft stärken (Verantwortung füreinander, Stärkung von Werten, Zugehörigkeitsgefühlen)	4	E					3	Orange	ja	Freiburg
Verbot Ausfuhr (Export) billiger Lebensmittel(-reste) die Kleinbauern in Dritte-Welt-Ländern Existenz nehmen	4	F	G				3	Orange	ja	Freiburg
Exkursionen „Hinter die Kulissen schauen“ (z.B. was passiert mit Biomüll, wie wird der Markt beliefert?) für Stadtteile/ Quartiere	4	B	R				3	Blau	ja	Freiburg
Treffpunkt für Ideen von Initiativen. Gleichgesinnte, die etwas umsetzen möchten. Beratung zur Unterstützung von Start-up´s bieten	4	E					3	Grün	ja	Freiburg
Staatliche finanzielle Anreize schaffen für nachhaltige Produktion	4	F	G				3	Grün	ja	Freiburg
Staatliche Förderung für vielfältige und kleinteilige Landwirtschaft -> preisliche Attraktivität	4	F	G				3	Grün	ja	Freiburg
Einbindung in Landwirtschaft durch räumliche Nähe (Gemüse in der Stadt) -> Verbundenheit	4	G	R				3	Grün	ja	Freiburg
Landvergabe nach sozialen Aspekten	4	G					3	Rot	ja	Freiburg
Menschen in Andersartigkeit/ Individualität beachten und begegnen	0						2	Gelb	ja	Dortmund
Vertrauen schaffen in die Zukunft, Anderen zuhören, ihre Ängste verstehen und sich mit ihnen auseinandersetzen.	0						2	Grün	ja	Dortmund
Hände weg von der Natur!	0						2	Orange	ja	Hamburg
Zwei Wasserkreisläufe im Haushalt	0						2	Orange	ja	Berlin
Wie kann der Verbraucher sich der Nachhaltigkeit seiner Ernährung bewusster werden? (->zur Verantwortung ziehen?)	0						2	Blau	ja	Münster
Radikale Veränderungen	0						2	Rot	ja	Freiburg
Mehr Zeit in Alltag für Essen und Kochen; Reihum füreinander Kochen	1	M	N	Q			2	Blau	ja	Kassel-Witzenhausen
Erkennen, dass auch Kleinigkeiten etwas verändern können (auch ich kann etwas bewegen, auch wenn ich nur einer von 8 Milliarden bin)	2	O					2	Orange	ja	Dortmund
Gleichgesinnte finden, die zusammen etwas bewegen können	2	E					2	Orange	nein	Dortmund
Zeit zum Hinterfragen von Gewohnheiten nehmen	2	O	Q				2	Grün	nein	Dortmund
Freunde zum gemeinsamen Kochen einladen	2	E	M				2	Blau	ja	Kassel-Witzenhausen
Mehr Zeit für persönliche Veränderung	2	Q					2	Gelb	ja	Berlin
Persönliche Barrieren bewusst machen -> warum setze ich mein Wissen nicht in die Tat um?	2	O					2	Grün	ja	Berlin
Sich andere Menschen suchen und gemeinsam Handeln	2	E					2	Grün	ja	Berlin
Schaffung von Ritualen	2	P					2	Grün	ja	Berlin
Förderung der Geschmackswahrnehmung	2	B	N	O			2	Rot	ja	Berlin
Ein Vorbild sein	2						2	Grün	ja	Münster
Wochenmärkte fördern und umgestalten, z.B. Feierabendmärkte	3	A					2	Rot	ja	Dortmund
Niedrigere Preise für nachhaltige Produkte durch Fördermittel	3	F	H				2	Rot	nein	Dortmund
Realer Preis für Nahrung -> für Fleisch	3	H					2	Gelb	ja	Kassel-Witzenhausen
Durch lose Waren (Unverpacktläden) bedarfsgerechten Einkauf ermöglichen und so Lebensmittelverschwendung eindämmen (Vorteilspackungen für Frischprodukte verleiten zu unsinnigem Einkauf)	3	A	L	S			2	Orange	ja	Kassel-Witzenhausen
Umstellung großer Unternehmen auf Bio z.B. DB -> Essen/ Getränke im Zug/ Fluggesellschaften	3	A	I				2	Blau	ja	Kassel-Witzenhausen
Ältere Schüler erzählen auf interaktive Weise, jüngeren Schülern über Ernährung/ Auswirkung und Werte -> so lernen beide Schülergruppen über Werte bezogen auf Ernährung anstatt von außen einen langweiligen Vortrag zu hören	3	B					2	Grün	ja	Kassel-Witzenhausen
Subventionierung von pflanzlichen Lebensmitteln: Erzeuger -> Saatgut, Verbraucher -> Endprodukt	3	F					2	Rot	ja	Kassel-Witzenhausen
Ein „Haus der Region“ mit Café, Kuchen, Shop, Bäckerei, Metzgerei, Rösterei, wo man sich treffen und kochen lernen kann, bzw. Lebensmittel herstellen	3	A	E	J			2	Gelb	ja	Hamburg
Stadt als Akteur gewinnen! Ansätze (Bio, Vegan, Regional) in Mensen, Förderung von Regionalität und neuen innovativen Ideen!	3	A	I	J	R		2	Gelb	ja	Hamburg
Fleisch und Milchprodukte verteuern	3	H					2	Gelb	ja	Hamburg
In jeden Stadtteil einen Gemüsegarten für alle (Allmende)	3	E	R				2	Gelb	ja	Hamburg
Essbare Stadtkonzepte realisieren	3	R					2	Blau	ja	Hamburg
Schon in Schulen etc. durch Kurse (Kochen usw.) eine nachhaltige Ernährung aufzeigen	3	B	M				2	Gelb	ja	Berlin
Koch- & Ernährungskurse an Schulen (langfristig -> Routine & Begeisterung für Kochen)	3	B	M				2	Gelb	ja	Berlin
Plattform für Landwirte anbieten, um saisonale und regionale Produkte zu fairen Preisen an die Konsumenten zu bringen, z.B. durch Märkte	3	A	G	J	K		2	Rot	ja	Berlin
Gesetzliche Regelung: Pflicht zur Kennzeichnung von Nahrung bzgl. Produktionsweise / Herkunftsweg	3	C	F				2	Rot	ja	Berlin
Vorleben von Bio-Konsum in den Medien/ durch Institutionen, vielleicht durch Regierung -> es muss selbstverständlich sein	3	D	F	I			2	Gelb	ja	Münster
Mehr Bio-Angebote in Supermärkte mit akzeptablen Preisen	3	A	H	I			2	Gelb	nein	Münster
Eigenes Unterrichtsfach an Schulen „Nachhaltige Ernährung“	3	B					2	Gelb	ja	Freiburg
Solidarwirtschaft fördern, so dass keiner gezwungen ist bei anständigem Lohn, bei Discountern/ Konzernen zu kaufen (die nicht solidarisch entlohnen)	4	E	F				2	Gelb	ja	Dortmund
Wirtschaft stärker in Verantwortung ziehen (Anreize, Sanktionen)	4	F					2	Gelb	ja	Dortmund
Klare Angaben auf den Produkten, welche Zutaten woher kommen	4	C					2	Orange	ja	Dortmund
Umweltbildung: Stadtteilzentren aufbauen – Infrastruktur zu Verfügung stellen	4	B	R				2	Orange	ja	Dortmund
Jeder wird angeleitet (in Schule, Kita, Uni, Unternehmen...), eine solche Vision zu entwickeln (Vorteile: es wird sichtbar wer wofür steht und man kann sich zusammenschließen)	4	B					2	Orange	nein	Dortmund
Bildung -> Praxis (spüren, schnibbeln, riechen, kochen, gemeinsam essen und reden, einkaufen)	4	B	E	M	N		2	Orange	nein	Dortmund
Eltern sind Vorbilder!	4	E					2	Blau	ja	Dortmund
Mundraubtouren – Bezug zu regionalen und saisonalen Produkten	4	E	J	K			2	Blau	ja	Dortmund
Praxis und Theorie verbinden -> Bildung durch „Machen“	4	B					2	Grün	ja	Dortmund
Menschen den Leistungsdruck nehmen: damit mehr Zeit bleibt, Essen zu zelebrieren. Schnelllebigkeit verlangsamen	4	N	Q				2	Grün	ja	Dortmund
Menschen persönlich berühren	4						2	Grün	nein	Dortmund
Kochkurse als Gemeinschaftserlebnis und Lernort für praktische Lebenserfahrung und Freude/ Lachen J	4	E	M				2	Rot	ja	Dortmund
Gesicherte staatliche Bildungsfinanzierung	4	F					2	Rot	ja	Dortmund
Sensibilisieren und Verbraucher das Gefühl geben, dass die individuelle Kauf-/ Konsumentscheidung bedeutsam ist	4	B					2	Gelb	ja	Kassel-Witzenhausen
Kochen, Backen, Einmachen, Konservieren, Vorratshaltung... wieder attraktiver machen, bzw. handwerkliches Können vermitteln	4	B	D	M	P		2	Orange	ja	Kassel-Witzenhausen
Ressourcenschonende Produktion (z.B. bei Elektrik austauschbare Materialien)	4	G					2	Blau	ja	Kassel-Witzenhausen
Eingeschränktes Angebot z.B. nur regional. Trotzdem kann man viele Bedürfnisse abdecken (ein Laden für alles)	4	A	J				2	Grün	ja	Kassel-Witzenhausen
Lobbyismus unterbinden	4	F					2	Rot	ja	Kassel-Witzenhausen
Anreize für ökologische Produktion: monetär, Prestige, garantierte Abnahme durch Verarbeiter	4	F	E				2	Rot	ja	Kassel-Witzenhausen
Schulsystem umgestalten: Theorie und Praxis eines nachhaltigeren Lebensstils	4	B					2	Gelb	ja	Hamburg
Guerilla-Aktion: Im Laden Preisschilder auf Produkte kleben mit den „wahren Kosten“	4	D	E	H			2	Orange	ja	Hamburg
Netzwerken, Kooperationen schaffen!	4	E					2	Orange	ja	Hamburg
Naturnahe Landwirtschaft fördern mi vielen unterschiedlichen Kulturen (Vielfalt)	4	G					2	Blau	ja	Hamburg
Bio Sortiment an der Tankstelle/ Raststätte/ Bahnhofskiosk/ Krankenhauskiosk/ Flugplatz	4	A	I				2	Blau	ja	Hamburg
Kommunales Stadtteilhaus -> Nachhaltigkeitsgedanken in Gruppen erleben, die gemeinsam Kampagnen entwickeln, gestalten, ...	4	D	E	R			2	Grün	ja	Hamburg
Mehr Workshops als Pflichtveranstaltungen	4	B					2	Grün	ja	Hamburg
Internalisierung von Kosten	4	F	H				2	Gelb	ja	Berlin
Arbeitszeiten wieder reduzieren -> 30 h Woche	4	F					2	Blau	ja	Berlin
Schulkantine durch Schüler betreiben lassen (teils)	4	B					2	Blau	ja	Berlin
Ernährung als soziales Event -> Spaß am Essen, Kochen… Z.B. über Medium Internet	4	D	E	M	N		2	Grün	ja	Berlin
Das Nützliche mit dem Angenehmen verbinden & Rituale schaffen; Gemeinschaft: Einkaufen, Beziehung/ Gespräch/ Austausch mit Händler/ Produzent/ untereinander; Zubereitung & Essen	4	B	E	M	N	P	2	Grün	ja	Berlin
Bedingungsloses Grundeinkommen („Gleiche“ Ausgangslage für Alle, Zeit sinnvoll & nach Begabung & Berufung einsetzen & genießen)	4	F					2	Rot	ja	Berlin
Weniger Verpackungen, ökologisch abbaubare Verpackungen entwickeln und auch verwenden im großen Stil -> Die Masse wird höhere Preise ausgleichen	4	S					2	Gelb	nein	Münster
Mehr Projekte wie „Urban Gardening“ oder „Essbare Stadt“	4	G	R				2	Gelb	nein	Münster
Verpackungsmüll reduzieren/ abbaubar gestalten	4	S					2	Gelb	nein	Münster
Gibt es wirklich gute Alternativen (lecker, einfach, günstig, genug) zu convenience Lebensmitteln?	4	A					2	Orange	ja	Münster
Wie kann man Produktions- und Handelswege für den Verbraucher durchsichtiger gestalten (z.B. in Restaurants)	4	B	C	D			2	Blau	ja	Münster
Kurze Transportwege	4						2	Blau	ja	Münster
Ressourcen nutzen	4						2	Rot	ja	Münster
Menschen bilden	4	B					2	Rot	ja	Münster
Achtsamkeit schulen	4	O					2	Rot	ja	Münster
Ausreichende Beleuchtung, keine Manipulation durch z.B. Medikamente/ Drogen	4	G					2	Rot	nein	Münster
Ausreichende finanzielle Mittel zur Verfügung stellen	4	F					2	Rot	nein	Münster
Lebensmittelproduktion erfahrbarer machen	4	G					2	Gelb	ja	Freiburg
Informationen auf/ an Produkten: CO2/ Gemeinwohl/ Bodenfruchtbarkeit etc.	4	B	C				2	Gelb	ja	Freiburg
„Handlungspädagogik“ in Landwirtschaft/ Gartenbau für alle Altersstrukturen	4	B					2	Gelb	ja	Freiburg
Evtl. neue Einsatzmöglichkeiten für „Unkraut“ (-> Unkraut als Ressource)	4						2	Grün	ja	Freiburg
Begrenzung für Betriebsgrößen	4	F	G				2	Rot	ja	Freiburg
Soziales Lernen von klein auf	4	B					2	Rot	ja	Freiburg
Viele kleine, regionale Lebensmittelhersteller	4	G	J				2	Rot	ja	Freiburg
Nahrung auf psychischer Ebene -> genährt sein	0						1	Orange	nein	Dortmund
Entfremdung angehen -> Kontakt zur Natur	0						1	Orange	nein	Dortmund
Sozialkompetenzen vorrangig vor dogmatischen Werten	0						1	Blau	nein	Dortmund
Wie kann in einer kurzlebigen Welt die Verknappung von Ressourcen vermittelt werden?	0						1	Orange	nein	Kassel-Witzenhausen
Geiz ist ungeil – Buttons mit solchen Sprüchen tragen	0						1	Blau	ja	Hamburg
Selbsterfahrung in der Lebensmittelzubereitung	1	B	M				1	Gelb	nein	Dortmund
Gelassenheit schaffen: Es darf kein „Stress“ sein, sich nachhaltig zu ernähren, keiner sollte sich unter Druck gesetzt fühlen -> Dieser Wert/ Wissen darf nicht aufgezwängt werden/ von Innen kommen -> gibt es überhaupt richtig /falsch	1	Q					1	Orange	nein	Dortmund
Essen als bewusste Auszeit	1	O	Q				1	Blau	nein	Dortmund
Gesund kochen lernen	1	B	M				1	Gelb	nein	Kassel-Witzenhausen
Problem: Zeitdruck -> keine nachhaltige Ernährung möglich; Lösung: Zeit finden, sich Zeit zum Essen nehmen	1	N	Q				1	Blau	nein	Hamburg
Sich selbst Hinterfragen ob „Lusthunger“ oder richtig Hunger!	1	O					1	Blau	nein	Münster
Zeit für Ernährung, Anbauerfahrungen, Zubereitung geben	1	B	M	Q			1	Rot	nein	Freiburg
Austausch	2	B					1	Gelb	nein	Dortmund
Kontakt mit Bauern pflegen -> regional oder auch international	2	B	J				1	Gelb	nein	Dortmund
Jeder könnte für sich eine Vision entwickeln, wie er sich ernähren möchte und möglichst wenig „Schaden“ anrichtet.	2	O					1	Orange	nein	Dortmund
Lokale Auseinandersetzung mit Nahrungsmittelproduktion	2	O					1	Blau	nein	Dortmund
Andere Menschen inspirieren durch neue Kochideen, regionale/ saisonales Essen besser umsetzen	2	J	K	M			1	Blau	nein	Dortmund
Private Kochtreffen mit Bekannten/ Freunden/ Fremden	2	E	M				1	Grün	nein	Dortmund
Sich mit Gleichgesinnten verbinden -> Austausch, Unterstützung, Stärkung	2	E					1	Grün	nein	Dortmund
Trends hinterfragen, nicht hinterherlaufen	2	B	O				1	Rot	nein	Dortmund
Finanzielle Unabhängigkeit -> freie Zeit in Engagement stecken	2						1	Rot	nein	Dortmund
Körpergefühl verbessern, in sich gehen	2	O					1	Gelb	nein	Kassel-Witzenhausen
Ist „neu“ immer besser? Kann ich von den Vorfahren evtl. mehr lernen als von allen aktuellen „Expertenmeinungen“ zusammen?	2						1	Orange	nein	Kassel-Witzenhausen
Nur, wenn ich den Ort kenne, wo mein Lebensmittel herkommt, kann ich guten Gewissens essen. -> sich beim Essen immer der Ursprungsort der Lebensmittel bildlich vorstellen!	2	B	C				1	Orange	nein	Kassel-Witzenhausen
Salutogenetische Versorgungsplanung	2						1	Gelb	nein	Berlin
Wertschätzung der Nahrung bewusst machen und erhöhen	2	O					1	Blau	ja	Berlin
Am Essen sollte nicht gespart werden. Nahrung/Lebensmittel ≠Geldverschwendung	2	H					1	Blau	nein	Berlin
Rituale schaffen	2	P					1	Blau	nein	Berlin
Mit Salz & Zucker sparsamer und bewusster umgehen!	2	M					1	Rot	nein	Berlin
Vorbild sein	2						1	Gelb	nein	Münster
Auf regionale Produkte/ Lebensmittel zurückgreifen	2	J					1	Gelb	nein	Münster
Bewusstsein stärken, dass Entscheidungen Auswirkungen auf Zukunft und gegenwärtige Prozesse haben	2	O					1	Orange	ja	Münster
Achtsam einkaufen mit Blick auf Auswirkungen auf andere	2	L	O				1	Orange	nein	Münster
„Lusteinkäufe“ meiden: Brauche ich es wirklich? Wem schade ich?	2	L					1	Orange	nein	Münster
Sich selber organisieren	2						1	Blau	nein	Münster
Selbstversorgung	2	G					1	Blau	nein	Münster
Austausch mit anderen Menschen	2	B	E				1	Grün	nein	Münster
Ernährung nicht isoliert betrachten	2	B					1	Gelb	ja	Freiburg
Schaffen von Genuss-/ Erfüllungsalternativen zum Konsum -> Vermeidung von Frustkäufen	2	L					1	Orange	ja	Freiburg
Meditation/ innere Ausrichtung stärken -> dadurch Ausstrahlung erhöhen und eigene Kraft stärken	2						1	Orange	nein	Freiburg
Verfügbarkeit schaffen -> im öffentlichen Raum ist es oft unmöglich, nachhaltige Lebensmittel zu bekommen	3	A					1	Gelb	nein	Dortmund
Gemeinschaft: Wenn viele an einem Ziel arbeiten fällt es leichter -> Viele gärtnern zusammen, einer holt Lebensmittel für viele, anstatt dass jeder selbst losfahren muss.	3	E	L				1	Orange	nein	Dortmund
Obstkörbe für die Mitarbeiter durch Firma bereitstellen	3	A					1	Blau	nein	Dortmund
Gesundes, nachhaltiges „Fastfood“	3	A					1	Blau	nein	Dortmund
Gemeinsames Kochen in z.B. Hostels	3	E	M				1	Blau	nein	Dortmund
Apps oder Internetseite über Saisonprodukte	3	B	K				1	Blau	nein	Dortmund
Essbare Bäume in Parks	3	R					1	Blau	nein	Dortmund
Kantine umstrukturieren, Essen bestellen: frische nachhaltige Caterer statt der Stamm-Pizzeria, Gemeinsames Essen organisieren: jeder bringt 1x die Woche etwas Frisches mit	3	A					1	Blau	nein	Dortmund
Durch Info-Zettel an den Produkten Verbraucher über den Produktionsvorgang informieren	3	B	C				1	Grün	nein	Dortmund
Positive Aspekte von Werbestrategien für nachhaltige Produkte nutzen	3	D					1	Rot	nein	Dortmund
Ladenkonzept: Bioprodukte direkt neben konventionellen Produkten stellen = direkter Vergleich möglich	3	A	I				1	Rot	nein	Dortmund
Mehr Möglichkeiten um unterwegs (schnell) gesund und nachhaltig zu essen	3	A					1	Gelb	ja	Kassel-Witzenhausen
Strukturen für Verpackungsfreien Einkauf stärken	3	A	S				1	Gelb	ja	Kassel-Witzenhausen
Gesunde Ernährung muss in öffentlichen Mensen/ Kantinen wichtiger als Preis sein	3	A	H				1	Gelb	nein	Kassel-Witzenhausen
Angemessene Preise für Lebensmittel -> keine Dumpingpreise mehr	3	H					1	Gelb	nein	Kassel-Witzenhausen
Transparenz bei regionaler Erzeugung (wo fanden einzelne Schritte der Produktionskette statt?) -> Ferkel -> Mast -> Schlachtung (Welcher Schritt definiert Regionalität?)	3	C	G	J			1	Blau	nein	Kassel-Witzenhausen
Bei Tierprodukten Herkunft der Tiere und des Futters transparent darstellen	3	C					1	Rot	ja	Kassel-Witzenhausen
Gesunde Lebensmittel leicht verfügbar machen durch Schul-/ Kindergartenspeisen, Mensen, Kantinen, Catering, Krankenhäuser…	3	A					1	Rot	ja	Kassel-Witzenhausen
Solidarische Landwirtschaft bekannter machen -> mehr Hofläden	3	A	D	E	G		1	Orange	nein	Hamburg
Warnung vor nicht nachhaltigen Produkten (Warndreieck Nicht BIO!!!)	3	I					1	Gelb	nein	Berlin
Bepreisung von Lebensmitteln angleichen (Fleisch ist konventionell zu billig; Wissen über „Lebens“mittel geht verloren)	3	H					1	Gelb	nein	Berlin
Handeln positiv verstärken durch Vorteile für Bio-Ernährung (Preis, gesellschaftliche Vorteile, Krankenkassen günstiger, Steuervorteile USt)	3	H	I				1	Grün	ja	Berlin
Kuschelgruppen einführen, die dich nur mitkuscheln lassen, wen du dich Bio ernährst	3	E	I				1	Grün	nein	Berlin
Realpreise für konventionell erzeugte Nahrung nehmen	3	H					1	Rot	ja	Berlin
Früherer Start der Ernährungslehre, damit richtige Ernährung selbstverständlich wird, z.B. durch Medien	3	B	D				1	Rot	ja	Berlin
Arbeitnehmer fördern gesunde Ernährung (Rabatt)	3	H					1	Blau	nein	Münster
Bio überall zu finden	3	A	I				1	Blau	nein	Münster
Gesunde Lebensmittel günstiger anbieten	3	H					1	Rot	nein	Münster
Verbraucher aufklären -> Bedeutung von nachhaltigen Lebensmitteln	3	B					1	Rot	nein	Münster
Ernährungsversorgung anders organisieren als über Supermarkt, z.B. über Food Coops	3	A	E				1	Gelb	ja	Freiburg
Zugang für alle zu qualitativ hochwertigen Lebensmitteln -> Auswahl/ Optionen/ Wahlfreiheit	3	A					1	Rot	nein	Freiburg
Anreize schaffen z.B. Nachhaltigkeitspunkte	4						1	Gelb	nein	Dortmund
Zu landwirtschaftlichen Erfahrungen einladen	4	B	G				1	Gelb	nein	Dortmund
„Berührungspunkte“ schaffen	4						1	Gelb	nein	Dortmund
Zu nachhaltigen Produkten spannende Geschichten erzählen	4	B	D				1	Gelb	nein	Dortmund
Gruppenkochen	4	E	M				1	Gelb	nein	Dortmund
Selbstbestimmung/ Selbstorganisation fördern	4						1	Gelb	nein	Dortmund
Gemeinschaftsgärten	4	E	G				1	Gelb	nein	Dortmund
Frühe Aufklärung	4	B					1	Orange	nein	Dortmund
Gemeinsam eine Basis schaffen, die aufklärt	4	B	E				1	Orange	nein	Dortmund
Transparenz schaffen (Was läuft gut? Was läuft schlecht?), so dass man auch entsprechend achten/ handeln kann	4	C					1	Orange	nein	Dortmund
Die Kraft der Gemeinschaft nutzbar machen	4	E					1	Orange	nein	Dortmund
Zugängliche Dachgärten (essbare Stadt, urbanes Gärtnern)	4	G	R				1	Blau	ja	Dortmund
Schulungen des Kantinenpersonals und Gesundheitsmanagement	4	B					1	Blau	nein	Dortmund
Küchen für Spontannutzung zu Verfügung stellen	4	E	M				1	Blau	nein	Dortmund
Menschen animieren: bewusst essen muss als etwas Schönes empfunden werden z.B. durch gemeinsame Art Feste: essen nicht nebenbei, sondern zelebrieren (Problem: Ist das für alle möglich?)	4	N	O				1	Blau	nein	Dortmund
Vertrauen durch Ehrlichkeit schaffen	4	C					1	Grün	nein	Dortmund
Food Sharing ausbauen und Konservierungsmöglichkeiten wieder aufleben lassen	4	B	E				1	Rot	nein	Dortmund
Bessere Work-Life-Balance durch z.B. 6 Stunden statt 8 Stunden Arbeitstage	4	F	Q				1	Rot	nein	Dortmund
Foodassembling - Solidarische Landwirtschaft	4	E	G				1	Rot	nein	Dortmund
Differenzierte & geprüfte Kennzeichnungspflicht (regional, saisonal, ökologisch, vegan/ vegetarisch, samenfest)	4	C	F	I	J	K	1	Rot	nein	Dortmund
Ernährungsrat gründen	4	F					1	Rot	nein	Dortmund
Mehr Aufklärung in Schulen! -> Kinder inspirieren wiederum ihre Eltern	4	B					1	Gelb	ja	Kassel-Witzenhausen
Gemeinschaftsgärten (als Einstiegshilfe)	4	E	G				1	Gelb	nein	Kassel-Witzenhausen
Mehr Bildung über Nachhaltigkeit in Schulen	4	B					1	Gelb	nein	Kassel-Witzenhausen
Unnötige Verpackungen verbieten	4	S					1	Gelb	nein	Kassel-Witzenhausen
Hofläden, offene landwirtschaftliche Betriebe, Eigenverarbeitung der Produkte statt Discounter und Supermärkte	4	A	G				1	Gelb	nein	Kassel-Witzenhausen
Verbot gewisser Substanzen, Verpackungen, Haltungsformen, Methoden, ...	4	F	S				1	Gelb	nein	Kassel-Witzenhausen
Kreislaufwirtschaft als Standard etablieren	4	G					1	Orange	ja	Kassel-Witzenhausen
Sich zusammen tun	4	E					1	Orange	ja	Kassel-Witzenhausen
Ökologischen Fußabdruck der Produkte bestimmen, denn: ein deutscher Lagerapfel ist nicht zwangsläufig „nachhaltiger“ als ein Importprodukt (auch, wenn das schön wäre!)	4	B					1	Orange	nein	Kassel-Witzenhausen
Positive Zukunftsszenarien entwerfen, die einfach umzusetzen sind -> realitätsnah, mit dem Menschen	4						1	Orange	nein	Kassel-Witzenhausen
Wertschätzung von Lebensmitteln fördern	4	O					1	Blau	nein	Kassel-Witzenhausen
Slow-Food	4	D	E	O	P		1	Blau	nein	Kassel-Witzenhausen
Weg von der Wegwertgesellschaft! (Reparatur statt Vernichtung!)	4						1	Blau	nein	Kassel-Witzenhausen
Landbaupraktika für alle Schüler	4	B	G				1	Grün	ja	Kassel-Witzenhausen
Foodsharing Verteilerlisten	4	E					1	Grün	nein	Kassel-Witzenhausen
Umdenken fördern	4	B					1	Grün	nein	Kassel-Witzenhausen
Brennnesseln als Superfood etablieren	4	D					1	Rot	nein	Kassel-Witzenhausen
Förderung von ökologischer bäuerlicher Landwirtschaft - Kleinbetriebe statt Großbetriebe	4	F	G				1	Rot	nein	Kassel-Witzenhausen
Urban Gardening in Freiflächen/ unbenutzten Stadtflächen/ Parks/ Grünstreifen	4	G	R				1	Rot	nein	Kassel-Witzenhausen
Energiepreise erhöhen/ besteuern	4	F					1	Rot	nein	Kassel-Witzenhausen
Eine Lebensmittel-Tauschbörse in der Nähe	4	A	E				1	Gelb	ja	Hamburg
Lobby der Lebensmittelindustrie politisch reglementieren	4	F					1	Gelb	nein	Hamburg
In jedem Stadtteil eine Volksküche, perfekt organisiert	4	E	M	R			1	Gelb	nein	Hamburg
Verbraucher braucht Informationen (die Wahrheit)	4	B					1	Gelb	nein	Hamburg
Aufklärungsansätze in der Schule	4	B					1	Gelb	nein	Hamburg
Regional-Rabatt, Inhabergeführt-Rabatt, Nachbarschafts-Rabatt (Nicht-online-Kauf-Rabatt)	4	D	J				1	Orange	ja	Hamburg
Zwischen Gerechtigkeit und Massentierhaltung Lücke schließen, Huhnaktie anbieten/ erwerben	4						1	Orange	ja	Hamburg
Verbot von Pestiziden und Kunstdünger	4	F					1	Orange	ja	Hamburg
Transparenz: alles hängt miteinander zusammen, Implikation des Handelns sichtbar machen	4	C					1	Orange	nein	Hamburg
Eigenverantwortung fördern	4						1	Blau	ja	Hamburg
Selbstversorgerstadt	4	G	R				1	Blau	ja	Hamburg
Das Vertrauen des Verbrauchers in den Produzenten wiederherstellen - Ethik	4	C					1	Blau	nein	Hamburg
Den Menschen den Gedanken einpflanzen, dass weniger oft mehr bedeutet. Weniger konsumieren – gesünder (seelisch und körperlich) leben	4						1	Blau	nein	Hamburg
Vorbilder inszenieren	4	D					1	Grün	ja	Hamburg
Politische Unterstützung der regionalen Landwirtschaft	4	F	G	J			1	Grün	ja	Hamburg
Ernährungsparlament	4	F					1	Grün	ja	Hamburg
Eine politische Partei bilden	4	E	F				1	Grün	nein	Hamburg
Förderung von „Soft skills“ (Organisation, Kommunikation, Präsentation, etc.) damit gesetzte Ziele auch in Angriff genommen und überzeugend umgesetzt werden können	4	B					1	Grün	nein	Hamburg
Externe Kosten (z.B. für Nitratbelastung, Testaufwand für Antibiotikaresistenz) ausweiten und als Steuer aufschlagen	4	F					1	Rot	ja	Hamburg
Lokale Handelswege optimieren	4	J					1	Rot	ja	Hamburg
Belohnung für regionale Produkte	4	J					1	Rot	ja	Hamburg
Bio und Fairtrade fördern!	4	F	I				1	Rot	ja	Hamburg
Korrelation zwischen Fehlernährung und Krankheit veröffentlichen! (Diabetes, Krebs)	4	B					1	Rot	ja	Hamburg
Lügen und Lobbyismus transparent machen	4	C					1	Rot	ja	Hamburg
Umweltstandards erhöhen	4	F					1	Rot	nein	Hamburg
Mehr Transparenz	4	C					1	Rot	nein	Hamburg
Pestizide, Herbizide boykottieren	4	F					1	Rot	nein	Hamburg
Tierschutzstandards erhöhen	4	F					1	Rot	nein	Hamburg
Aktivisten fördern	4	E					1	Rot	nein	Hamburg
Deutliche Kennzeichnung der Produkte	4	C	F				1	Gelb	ja	Berlin
Herstellung / Herkunft der Produkte auf Verpackung schreiben (wie bei Abschreckfotos auf Zigaretten)	4	B	C	D			1	Gelb	ja	Berlin
Keine Bevormundung (-> stößt ab) sondern Empowerment (z.B. Kampagnen, Top-Down Bestimmung, gesetzliche Regulierung)	4	B	D	E			1	Gelb	ja	Berlin
Werbung regulieren!! (Realitätsbezug, Materialismus & Konsumismus)	4	D	F				1	Gelb	ja	Berlin
GAP Greening statt „Flächensubventionen“	4	F					1	Gelb	nein	Berlin
Öffentliche Werbung steigern	4	D					1	Gelb	nein	Berlin
Regional (gesamt) Produktion fördern – weltweit	4	G	J				1	Gelb	nein	Berlin
Zerstückelung der Warenproduktion stoppen, um Verständnis für Zusammenhänge zu halten.	4	G					1	Gelb	nein	Berlin
Essbare Stadt	4	G	R				1	Gelb	nein	Berlin
(Lokale) Räte entscheiden: - welche Projekte/ Initiativen erhalten (öffentliche) Fördergelder = Andocken an dem, was ist, um Weichen für die Zukunft zu stellen	4	E	F	J			1	Orange	ja	Berlin
Interkulturelle Workshops/ Austauschprograme mit Dritt-Welt-Ländern	4	B	P				1	Orange	ja	Berlin
Sanktionen bei erhöhten Nitrateinträgen	4	F					1	Orange	ja	Berlin
Weg vom Überangebot	4	A					1	Orange	ja	Berlin
Stopp der Privatisierung	4	F					1	Orange	nein	Berlin
Keine Privatisierung von Quellen	4	F					1	Orange	nein	Berlin
„Reste- App“ -> Reste in App anbieten zum Abholen von anderen	4	D					1	Blau	ja	Berlin
Kochkurse in allen Lebensbereichen anbieten: Schule, Ausbildung, Arbeit	4	B	M				1	Blau	ja	Berlin
Essen -> Gemeinsam konsumieren, sich austauschen	4	B	E	N			1	Blau	nein	Berlin
Austausch an Informationen/ Meinungen	4	B					1	Grün	ja	Berlin
Keine Abholzung von Wäldern für Anbauflächen	4	G					1	Rot	ja	Berlin
Bauernmärkte zur Normalität werden lassen	4	A	G				1	Rot	nein	Berlin
Gesellschaftliches Umdenken erwirken (Politik, Lifestyle…)	4	E					1	Rot	nein	Berlin
Land für die Deckung des Eigenbedarfs der Bevölkerung sichern und erst dann den Rest verkaufen	4	F	G				1	Rot	nein	Berlin
Angebot ändern	4	A					1	Gelb	nein	Münster
Aufklärung nicht nur in Deutschland	4	B					1	Gelb	nein	Münster
Bio-Einkauf zum Erlebnis machen	4	I	L				1	Gelb	nein	Münster
Bioeinkauf modernisieren	4	A	I				1	Orange	ja	Münster
Nur noch erneuerbare Energien	4	F					1	Orange	nein	Münster
Bio-Fertigprodukte und Bio-to go	4	A	I				1	Blau	ja	Münster
Austausch (Rezepte, Infos, Zutaten, Erfahrungen)	4	B					1	Grün	ja	Münster
Gemeinschaftsgefühl aufbauen/ erhalten -> Nachbarschaftshilfe	4	E					1	Grün	ja	Münster
Umsichtig Leben, sodass eine „Rote Liste“ nicht nötig ist (Artenschutz)	4	O					1	Grün	nein	Münster
Unterstützung der Bio-Bauern	4	G	I				1	Rot	nein	Münster
Regionaler/ Saisonaler Anbau	4	G	J	K			1	Rot	nein	Münster
Ehrliche Produkte, vertrauenswürdige/ zuverlässige Labels	4	C					1	Rot	nein	Münster
Strafen für Bauern, wenn sie Pestizide und ähnliches einsetzen	4	F	G				1	Rot	nein	Münster
Bonuspunkte bei gesunder, nachhaltiger Ernährung	4	F					1	Rot	nein	Münster
Innovationsbonus für Unternehmen	4	F					1	Rot	nein	Münster
Steuern für Bodenabbau und Umweltschädigungen in Landwirtschaft und Boni für Boden-Aufbau, Landwirtschafts-Regeneration	4	F	G				1	Gelb	nein	Freiburg
Eltern, Lehrer/innen, Politik, Unternehmer müssen sich vorbildlich verhalten	4	B	E	F			1	Gelb	nein	Freiburg
Preisdruck für Produzent/innen angehen ( sollten auch von biologischer Produktion leben können ohne viele Schwierigkeiten)	4	G	H				1	Gelb	nein	Freiburg
Viele kleine überschaubare Projekte initiieren und unterstützen: Think global, act local	4	E					1	Gelb	nein	Freiburg
Food-Kooperativen	4	A	E				1	Gelb	nein	Freiburg
Neuen Trend „entstehen“ lassen: „Real Green“	4	D					1	Gelb	nein	Freiburg
Emotionale Bindung zur Natur fördern -> Bildungsbereich	4	B					1	Gelb	nein	Freiburg
Politische Rahmenbedingungen ändern. „Besserstellung“ von nachhaltigen Produkten/ Sanktionen für nicht nachhaltige Produkte. „Preise anpassen“	4	F					1	Gelb	nein	Freiburg
Feste Preise für Zukunftsfähige Lebensmittelerzeugung	4	G	H				1	Gelb	nein	Freiburg
Mehr Schulbesuche in landwirtschaftlichen Betrieben	4	B	G				1	Orange	ja	Freiburg
Verpackungsfreie Läden	4	A	S				1	Orange	ja	Freiburg
Transport von Kleinbauern an den Konsumenten organisieren	4	A	G	E			1	Orange	nein	Freiburg
Poesie und Kunst als Vermittler	4	B	D				1	Orange	nein	Freiburg
Kochrezepte entwickeln, die möglichst wenig Verpackung/ Zutaten etc. verbrauchen	4	B	M	S			1	Orange	nein	Freiburg
Einkaufsläden ohne Verpackung	4	A	S				1	Blau	ja	Freiburg
Obstkörbe für Büros (regional & saisonal)	4	A	J	K			1	Blau	ja	Freiburg
Energie sparen beim Kochen für Viele	4	M					1	Blau	ja	Freiburg
Unternehmen bieten Bio-Lebensmittel in der Verpflegung an	4	A	I				1	Blau	ja	Freiburg
Gruppen, die gemeinsam zu den Erzeugern fahren	4	B	E	G			1	Blau	nein	Freiburg
Vernetzung bestehender Initiativen	4	E					1	Grün	ja	Freiburg
Bildungsexkursionen: Neben Spaß, Sprach- und Kulturaustausch gezielt Klimaherausforderungen für die Ernährung erfahren und Lösungen in anderen Regionen und Ländern kennenlernen.	4	E	J	P			1	Grün	ja	Freiburg
Ausdifferenzierte Bildungslandschaft (Meinungsbildung, Information, Verbundenheit durch Erfahrungen)	4	B					1	Grün	nein	Freiburg
Verpackungsfreie Lebensmittel	4	S					1	Grün	nein	Freiburg
Dienstleistungen bei Erzeuger (Bauer etc.) als Alternativ-Währung (teilweise)	4	G	H				1	Grün	nein	Freiburg
Werbung für nachhaltig hergestellte Produkte	4	D					1	Rot	ja	Freiburg
Herstellungsmethoden transparent machen (gläserne Produktion, Hofläden, Internetplattformen, Apps, Mitarbeiten auf dem Hof als „Fitnessstudio im Freien“)	4	C	D	G			1	Rot	ja	Freiburg
Erlöse für Produzent/innen erhöhen -> Preis sollte bei Produzent/innen ankommen	4	G					1	Rot	ja	Freiburg
Labeling für qualitative Lebensmittel	4	C					1	Rot	nein	Freiburg
Ausreichende Produktion von „guten“ Lebensmitteln in allen Regionen	4	G	J				1	Rot	nein	Freiburg
Glyphosatverbot	4	F					1	Rot	nein	Freiburg
Kleine Lebensmittelgeschäfte sollen gefördert werden -> breite Streuung	4	A					1	Rot	nein	Freiburg
Dezentralisierung der Lebensmittelproduktion -> Viele kleine lokale Unternehmen (gib Multikonzernen keine Chance)	4	A	G				1	Rot	nein	Freiburg
Umweltauflagen um Bodenfruchtbarkeit und Wasserqualität zu erhalten	4	F					1	Rot	nein	Freiburg
Vorschriften für Transparenz und Nachvollziehbarkeit	4	C	F				1	Rot	nein	Freiburg
Individualverkehr (Autos) -> Abgase in den Städten reduzieren	0						0	Gelb	nein	Dortmund
Wissen – Aktivität –> Handeln	0						0	Gelb	nein	Dortmund
Nicht: „Du böse, ich gut“	0						0	Gelb	nein	Dortmund
Mit einfachen Dingen beginnen: „Wer duscht gern mit toten Tieren?“	0						0	Gelb	nein	Dortmund
Lernen, was heute überhaupt „einfach“ ist	0						0	Orange	nein	Dortmund
Andere anregen durch eine kleine Pflanze	0						0	Orange	nein	Dortmund
Vertrauen in die Kraft von natürlichen Prozessen	0						0	Orange	nein	Dortmund
Inhalt: keine Produkte, sondern Haltung! Jemand begleitet Themenabende	0						0	Blau	nein	Dortmund
Inklusion fördern auf allen Ebenen: soziale Schicht, Gesundheit, Alter, Kultur, Nationalität, Geschlecht; Ghettoisierung entgegenwirken	0						0	Rot	nein	Dortmund
Arbeitseffektivität messen und nicht Anwesenheit; Gerechtes Bezugssystem (Bsp. überhöhte Pensionen & Gehälter)	0						0	Rot	nein	Dortmund
Verderben, Konservierung	0						0	Gelb	nein	Kassel-Witzenhausen
Neue Wertmaßstäbe setzen, z.B. -Verbot von Zoos, Zirkussen mit Tieren etc. -Achtung von Tieren	0						0	Gelb	nein	Kassel-Witzenhausen
Keine Verschönung	0						0	Gelb	nein	Kassel-Witzenhausen
Langzeitwirkung/ Effekte von Zusätzen (Antibiotika) von genetischer Manipulation	0						0	Gelb	nein	Kassel-Witzenhausen
Nahrungsaufnahme – Mittel zum Zweck	0						0	Gelb	nein	Kassel-Witzenhausen
Welche Voraussetzung bzw. Situationen braucht es, welche eine Gesellschaft bzw. Individuen zum Handeln zu nötigen?	0						0	Orange	nein	Kassel-Witzenhausen
Unterschiede der Wahrnehmung in Menschenleben und Erdzeitaltern	0						0	Orange	nein	Kassel-Witzenhausen
Wie passen Leben im Überfluss mit der Hungersnot zusammen?	0						0	Orange	nein	Kassel-Witzenhausen
Unser Konsum beeinflusst Konsummöglichkeit anderer Menschen?	0						0	Orange	nein	Kassel-Witzenhausen
Verwertungs-Kreisläufe in urbanen Raum möglich?	0						0	Blau	nein	Kassel-Witzenhausen
Städte produzieren Müll - warum?	0						0	Blau	nein	Kassel-Witzenhausen
Braucht es Verpackung (Plastik)?	0						0	Blau	nein	Kassel-Witzenhausen
Die Dummen rennen, die Klugen warten, die Weisen gehen in den Garten.	0						0	Rot	nein	Kassel-Witzenhausen
Mehr Praxiserfahrungen	0						0	Gelb	nein	Hamburg
Mehr Ressourcen nutzen	0						0	Gelb	nein	Hamburg
Angst vor menschlichen Einfluss und Vernichtung des Lebens (aus Wasser wird Politik)	0						0	Orange	nein	Hamburg
Wasser als Ursprung für Leben und Hoffnung wird als Geschenk Gottes betrachtet	0						0	Orange	nein	Hamburg
Sünder an den Pranger stellen!	0						0	Blau	nein	Hamburg
Natürliche Auslese	0						0	Rot	nein	Hamburg
Wo liegt generell das „Problem“ wenn Menschen trotz Bewusstsein nicht danach handeln?	0						0	Gelb	nein	Berlin
Allmende: Überschaubare Sozietäten	0						0	Gelb	nein	Berlin
Neid, Ängste sind problematisch	0						0	Gelb	nein	Berlin
Mehr Natur von Kindergarten an	0						0	Gelb	nein	Berlin
Lässt sich der heutige „Luxus“ mit Nachhaltigkeit vereinbaren?	0						0	Gelb	nein	Berlin
Spätestens aus der „Not“ heraus?!	0						0	Orange	nein	Berlin
Verpackung als Notwendigkeit?	0						0	Orange	nein	Berlin
Repair-Cafés	0						0	Orange	nein	Berlin
Zeit! Was bedeutet zu wenig Zeit haben?	0						0	Blau	nein	Berlin
Offenheit	0						0	Grün	nein	Berlin
Keine genveränderten Versuche an Menschen	0						0	Rot	nein	Berlin
Schocktherapie	0						0	Gelb	nein	Münster
Ausgeglichen handeln	0						0	Orange	nein	Münster
Die Konsequenzen anderer tragen	0						0	Orange	nein	Münster
Kann Bio/ nachhaltig massentauglich werden? Ist es dann noch nachhaltig?	0						0	Orange	nein	Münster
Wie lässt sich das gesunde Maß finden?	0						0	Blau	nein	Münster
Mehr Abfall im Singlehaushalt	0						0	Blau	nein	Münster
„Weltoffen“	0						0	Rot	nein	Münster
Sind die Werte „falsch“? Überhöht?	0						0	Gelb	nein	Freiburg
Welche Handlungsmöglichkeiten bestehen? Wie lassen sie sich erweitern?	0						0	Gelb	nein	Freiburg
Ist der Lückenschluss die Lösung?	0						0	Gelb	nein	Freiburg
Wissen/Werte- Handeln-Lücke; Ziel: Vorteil Vorstellung	0						0	Gelb	nein	Freiburg
Was gibt es vor Ort?	0						0	Blau	nein	Freiburg
Kapitalismus zerschlagen!	0						0	Rot	nein	Freiburg
(Dunkle) Mächte vernichten (Episode VIII)	0						0	Rot	nein	Freiburg
Nicht im Übermaß kaufen, dann kann man sich auch gesunde Sachen kaufen	1						0	Rot	nein	Dortmund
Sich Zeit nehmen für das Einkaufen, Essen und Kochen	1	L	M	N	Q		0	Gelb	nein	Kassel-Witzenhausen
Wichtiger Schritt: Das Einkaufen -> Denn: Hat man keine ungesunden und nicht-nachhaltigen Produkte zuhause, isst man sie nicht oder jedenfalls weniger	1	L					0	Gelb	nein	Kassel-Witzenhausen
Zeit nehmen für das Essen	1	N	Q				0	Blau	nein	Kassel-Witzenhausen
Zeit für Kochen und Essen als Ereignis	1	M	N	Q			0	Rot	nein	Kassel-Witzenhausen
Man braucht den Neustart, vom Körper auch von der Besinnung. Ich mache die Tage ohne essen, nur Wasser. Zwei Mal pro Jahr machen ich 7-14 Tage Hungern (Fastenkur)	1	O					0	Gelb	nein	Hamburg
Ideen für schnelle, nachhaltige Ernährungsoptionen finden (z.B. mehr Rezepte, mehr nachhaltige Restaurants)	1	A					0	Blau	nein	Hamburg
Vom Ziel her denken: Ernährung als Mittel für Ziel, Gesundheit, Fitness, Genuss, Lernen, (Bewusstseinsbildung, Zertifizierung/ Hinweise)	1	O					0	Grün	nein	Berlin
Lebensmittel (Bio etc.) für unterwegs einpacken	1	A	I				0	Gelb	nein	Münster
Oft ist es eine Zeitfrage. Selbst wenn Wissen und Werte über gesunde und nachhaltige Ernährung vorhanden sind, ist es schwer in den Alltag einer großen Familie einzubringen und umzusetzen -> mehr Zeit für Ernährung	1	Q					0	Gelb	nein	Freiburg
Mehr Zeit für Ernährung einzubringen und umzusetzen	1	Q					0	Gelb	nein	Freiburg
Zeit nehmen für Vorbereitung/ Beschaffung des Essens	1	L	M	Q			0	Blau	nein	Freiburg
Neue Essgewohnheiten entwickeln	1	N					0	Rot	nein	Freiburg
Mehr Zeit für Nahrungszunahme: bewusstes Essen. Essen schmecken, erspüren	1	N	O	Q			0	Rot	nein	Freiburg
Verantwortung als Konsument erkennen	2	O					0	Gelb	nein	Dortmund
Ich: Kritisch „Handeln“ hinterfragen, reflektieren, neu Handeln; Andere: Reden, vorleben, austauschen	2	O					0	Gelb	nein	Dortmund
Bewusste Erfahrungen in anderen Kulturen bspw. Im Urlaub sammeln	2	O	P				0	Gelb	nein	Dortmund
Verknüpfung Einkaufen (z.B. Bio-Produkte) mit z.B. Radtour	2	L	I				0	Gelb	nein	Dortmund
Kreative Ernährung	2						0	Gelb	nein	Dortmund
Bewusstsein schaffen: Was hat mein Verhalten für Auswirkungen auf die anderen Menschen der Welt im Hinblick darauf, dass wir uns alle die Welt teilen?	2	O					0	Orange	nein	Dortmund
Ressourcen achtsam nutzen -> durch direkten Kontakt zu ihrer Erzeugung	2	O	B				0	Orange	nein	Dortmund
Sich selbst daran erinnern, welche Unterschiede bestehen. Handeln: was ist daran gut, was schlecht?	2	O					0	Orange	nein	Dortmund
Der Einzelne ist auch Teil der Gemeinschaft	2	E					0	Orange	nein	Dortmund
Strukturen suchen, wo ich leben kann woran ich glaube. Raus aus der Stad, aus dem Land?	2						0	Grün	nein	Dortmund
„Früchte der Arbeit ernten“, Anstrengung lohnenswert sehen	2	O					0	Grün	nein	Dortmund
Beim Kochen Erfahrung sammeln und dazu lernen (leicht und spielerisch)	2	B	M				0	Grün	nein	Dortmund
Veranstaltungen (Messen, Feste…) nutzen: mit Freunden, Kindern, Nachbarn... um Lebensweise kennenlernen als unverbindliche Info-Quelle	2	B					0	Grün	nein	Dortmund
Sich bewusstmachen, wie viel ich wegwerfe	2	O					0	Grün	nein	Dortmund
Neue Erfahrungen machen: Settingwechsel durch: Kochkurse, neue Rezepte, andere Menschen	2	B	M	O			0	Grün	nein	Dortmund
Bereit sein, sich auf Neues/ Anderes einzulassen	2	O					0	Grün	nein	Dortmund
Als Verbraucher sich mit anderen Verbrauchern austauschen	2	B	E				0	Rot	nein	Dortmund
Nicht hinnehmen, was ich sehe und mir nicht gefällt! Mutig sein, zu handeln, entgegenwirken	2						0	Rot	nein	Dortmund
Kritische Konsumentenhaltung durchschaut Marketingstrategie der „heilen Welt“-Suggestion	2						0	Rot	nein	Dortmund
Geschmack schulen	2	B					0	Gelb	nein	Kassel-Witzenhausen
Lebensmittelabfälle vermeiden	2						0	Gelb	nein	Kassel-Witzenhausen
Alles kann ich auf einmal sowieso nicht umsetzen, trotzdem will ich mich stetig weiterentwickeln -> regelmäßige Denkanstöße	2						0	Gelb	nein	Kassel-Witzenhausen
Mehr Auseinandersetzung mit dem Thema „Was der Fleischkonsum für Folgen hat“	2	B					0	Gelb	nein	Kassel-Witzenhausen
Oft keine „Kapazität“ für eingehende Beschäftigung -> Nachhaltigkeit muss auf allen Ebenen des Lebens ansetzen	2	Q					0	Gelb	nein	Kassel-Witzenhausen
Zeit für gesundes Essen/ selbst kochen	2	M	Q				0	Gelb	nein	Kassel-Witzenhausen
Noch mehr Wissen anreichern	2	B					0	Gelb	nein	Kassel-Witzenhausen
Prioritäten im eigenen Leben anders setzen	2	O					0	Gelb	nein	Kassel-Witzenhausen
Einfach machen/ umsetzen	2						0	Gelb	nein	Kassel-Witzenhausen
In einem wohligen/ harmonischen Umfeld auf das Thema Nachhaltigkeit eingehen (Familien, Feste, Natur, usw.)	2						0	Orange	nein	Kassel-Witzenhausen
Systeme kritisch hinterfragen, neue Lösungswege, Alternative finden	2	B					0	Orange	nein	Kassel-Witzenhausen
Selber Nachdenken/ Handeln ohne sich „höheren Mächten“ zu unterwerfen	2						0	Orange	nein	Kassel-Witzenhausen
Vor dem (Ein-)Kaufen überlegen	2	M	O				0	Blau	nein	Kassel-Witzenhausen
Achtsam essen, schmecken	2	N	O				0	Blau	nein	Kassel-Witzenhausen
Spaß beim Kochen	2	M					0	Blau	nein	Kassel-Witzenhausen
Freude am Essen -> gemeinsam Essen	2	E	N				0	Blau	nein	Kassel-Witzenhausen
Mehr Eigenverantwortung übernehmen	2						0	Gelb	nein	Hamburg
Mehr Wissen erlangen	2	B					0	Gelb	nein	Hamburg
Eine Woche/ ein Monat ideale Ernährung praktizieren, ausprobieren	2						0	Gelb	nein	Hamburg
Selber kochen (lernen)	2	B	M				0	Gelb	nein	Hamburg
Selber gärtnern (für ein wenig Selbstversorgung und viel Einblick)	2	G					0	Gelb	nein	Hamburg
Auch mal Anlagen der Massentierhaltung besuchen bzw. den Versuch dokumentieren	2	B					0	Gelb	nein	Hamburg
Höfe besuchen, ganz verschiedene (große, kleine, Bio, Konventionelle)	2	B	G	I			0	Gelb	nein	Hamburg
Lebensmittel selber anbauen (-> Gemeinschaftsgärten, Kitas, Schulen...)	2	B					0	Gelb	nein	Hamburg
Man darf nicht zu hohe Ansprüche haben (-> nicht „perfekt“ sein wollen)	2						0	Gelb	nein	Hamburg
Ich brauche Gleichgesinnte zum Mitmachen (-> Peer)	2	E					0	Gelb	nein	Hamburg
Ich tausche Kochen gegen eine andere Dienstleistung	2	M					0	Gelb	nein	Hamburg
Viel Mehr bewegen, weniger essen	2	N					0	Orange	nein	Hamburg
Zwischen Gerechtigkeit und Massentierhaltung Lücke schließen -> Selber Hühner halten	2						0	Orange	nein	Hamburg
Zwischen Gerechtigkeit und Massentierhaltung Lücke schließen -> Höfe besuchen, immer wieder zumindest versuchen	2	B					0	Orange	nein	Hamburg
Mehr Zeit	2	Q					0	Blau	nein	Hamburg
Hintergründe kennen	2	B					0	Blau	nein	Hamburg
Entwicklung von Umsetzungsstrategien	2						0	Grün	nein	Hamburg
Motivation!	2						0	Grün	nein	Hamburg
Beobachten -> selbstständig denken -> zum selbstständigen Handeln animieren	2	B					0	Grün	nein	Hamburg
Auswirkungen des eigenen Handelns begreiflich machen	2	O					0	Gelb	nein	Berlin
Gründe für unnachhaltiges Verhalten eliminieren/ reduzieren	2						0	Gelb	nein	Berlin
Partizipation i.S. des Bewusstseins: Ich bin Gestalter/in meines Umfelds/ Lebens = Recht-Nahme	2	O					0	Gelb	nein	Berlin
Problem? Muss letzten Endes durch eigenen Willen entstehen	2						0	Gelb	nein	Berlin
Verantwortung erkennen und umsetzen (Handeln aus starkem Bewusstsein)	2	O					0	Orange	nein	Berlin
Regionale Produkte bevorzugen / fördern	2	J					0	Blau	nein	Berlin
Pause machen, tief Durchatmen, sich selbstbewusst fühlen, entschleunigen	2	O	Q				0	Blau	nein	Berlin
Essen (Zubereitung) nicht nur als Verlust von Zeit wahrnehmen lernen!	2	N	Q				0	Blau	nein	Berlin
Kompostierung von Haushaltsabfälle auf dem eigenen Balkon	2						0	Blau	nein	Berlin
Vitalpausen/ Umgestaltung der Pausen -> kleinere Pausen + strikte Pauseneinhaltung	2	Q					0	Blau	nein	Berlin
Psychisch/Mentale Bedürfnisse durch geerdeten Konsum (Eigenarbeit, Nahrung/ Ernährung erarbeiten) befriedigender gestalten	2						0	Blau	nein	Berlin
Meinen Alltag besser planen	2	O					0	Gelb	nein	Münster
Sich nicht mit anderen vergleichen	2						0	Gelb	nein	Münster
Emotionseinkäufe vermeiden	2	L					0	Gelb	nein	Münster
An meine Mitmenschen denken und diese wertschätzen	2	O					0	Orange	nein	Münster
Eigene Bedürfnisse zurückstellen, auch in Eile	2	O	Q				0	Orange	nein	Münster
Mehr auf die Herkunft der Lebensmittel achten	2	C	O				0	Orange	nein	Münster
Bedarfsgerechter Einkauf	2	L					0	Blau	nein	Münster
Eigene Landwirtschaft/ Bio-Produkte	2	G	I				0	Blau	nein	Münster
Wie kann man Mensch mehr zum selber Kochen animieren?	2	M					0	Blau	nein	Münster
Bedarfsgerechter Konsum (auch an Feiertagen)	2	N					0	Blau	nein	Münster
Sich informieren	2	B					0	Blau	nein	Münster
„Selbstversorger“	2	G					0	Blau	nein	Münster
Wieder/ mehr selber kochen!	2	M					0	Blau	nein	Münster
Seine Meinung erklären, vertreten aber nicht aufzwingen! -> Gewalt (Blitzsymbol)	2						0	Grün	nein	Münster
Inneren „Schweinehund“ überwinden!	2						0	Grün	nein	Münster
Medien als Infoplattform nutzen!	2	B	D				0	Grün	nein	Münster
Selbstengagement für nachhaltigeren Lebensstil	2						0	Grün	nein	Münster
Verantwortung/ Bewusstsein was Handeln auslöst!	2	O					0	Grün	nein	Münster
Verantwortungsbewusst handeln	2	O					0	Grün	nein	Münster
Freie Entscheidungen als Individuum treffen können	2						0	Rot	nein	Münster
Was man liebt, will man schützen	2						0	Gelb	nein	Freiburg
Suffizienz Erfahrungen machen. Was brauche ich wirklich? Und was steht hinter welchem Produkt	2	B					0	Orange	nein	Freiburg
Veränderungen brauchen Zeit; neue Handlungsstrategien entstehen nicht von heute auf morgen -> Zeit lassen, kein Zwang	2	Q					0	Orange	nein	Freiburg
Die Rolle der Lebensmittel im Zusammenhang mit unserer Lebensart betrachten	2	B	O				0	Orange	nein	Freiburg
Weniger kaufen = weniger wegwerfen? -> „Müllgrenze“	2	L					0	Orange	nein	Freiburg
Spirituelle Ansätze ausprobieren (über freilassend - nicht manipulativ)	2						0	Orange	nein	Freiburg
Mehr rausgehen (vor allem mit Kindern)	2						0	Orange	nein	Freiburg
Vielfalt entdecken -> Neues wertschätzen	2	B	O				0	Blau	nein	Freiburg
Bewusstsein für „Man ist was man isst“	2	O					0	Grün	nein	Freiburg
Transparenz schaffen: jeder will seine Produkte verkaufen und stellt sie toll dar -> objektive Bewertungen zu allen Lebensmitteln in verschiedenen Kriterien (Fair Trade, regional, ökologisch…)	3	C	J				0	Gelb	nein	Dortmund
„Ökopunkte“ auf den Produkten, je nach ökologischer Qualität	3	D					0	Orange	nein	Dortmund
Fertig gepackte Selbstversorgungsrucksäcke anbieten (als Supermarkt in Ausflugsregionen)	3	A	J				0	Blau	nein	Dortmund
Umfangreiche Informationen zu ökologischen und ökonomischen Qualitäten der jeweiligen Produkte	3	B	C				0	Rot	nein	Dortmund
Höhere Produktpreise für konventionelle Produkte	3	H					0	Rot	nein	Dortmund
Ehrliche Werbung mit konstruktiven Argumenten zur Umweltqualität der Produkte	3	D					0	Rot	nein	Dortmund
Mehr Biorestaurants	3	A	I				0	Gelb	nein	Kassel-Witzenhausen
Mensa auf Bio und vegetarisch umstellen	3	A	I				0	Gelb	nein	Kassel-Witzenhausen
Kochen lernen in der Schule/ Kindergarten	3	B	M				0	Gelb	nein	Kassel-Witzenhausen
Angebotsverknappung -> Rationierung von tierischen Lebensmitteln	3	A					0	Gelb	nein	Kassel-Witzenhausen
Größere Bioauswahl in Supermärkten	3	A	I				0	Gelb	nein	Kassel-Witzenhausen
Bezahl 2 Kauf 3 Aktionen umwandeln in Kauf 2 Bio, bekomme 1 eine Woche später	3	D	I				0	Gelb	nein	Kassel-Witzenhausen
Restaurants: Lebensmittel/ Gerichte am Ende des Tages kostenlos abgeben an Verbraucher	3	A					0	Gelb	nein	Kassel-Witzenhausen
Mehr Biorestaurants in Städten	3	A	I	R			0	Gelb	nein	Kassel-Witzenhausen
In Städten als Willkommensgeschenk für Neuankömmlinge, z.B. 1 Monat Bio-Kiste frei Haus	3	A	I	R			0	Gelb	nein	Kassel-Witzenhausen
Ernährungsampel für Tierwohl/ Natur/ Gesundheit auf Packungen	3	B	C	S			0	Gelb	nein	Kassel-Witzenhausen
Punkte/ Prämiensystem in Supermärkten für Kauf von Bioprodukten	3	D	I				0	Gelb	nein	Kassel-Witzenhausen
Mehr Aufklärung über die Herkunft der Lebensmittel	3	B	C				0	Gelb	nein	Kassel-Witzenhausen
Kochkurse mit Schwerpunkt Regionalität und Saisonalität in der Schule	3	J	K	M			0	Gelb	nein	Kassel-Witzenhausen
Durch massive Besteuerung nicht-nachhaltig erzeugter Produkte	3	F					0	Gelb	nein	Kassel-Witzenhausen
Erziehungsregeln bei Kindern darauf anpassen. „Nachhaltige Ernährung“ als Schulfach, ökologische Höfe für Klassenfahrten, Verbannung von Zucker und tierischen Produkten aus der Ernährung -> hin zu pflanzlicher Kost	3	B					0	Gelb	nein	Kassel-Witzenhausen
Aufklärung: Trailer/ Kurzfilm über nachhaltige und gesunde Ernährung vor Hauptfilmen in öffentliche Kinos	3	B	D				0	Gelb	nein	Kassel-Witzenhausen
Persönlicherer Bezug zum Essen kann nur funktionieren, wenn ich vom Produzenten eine Story mitgeliefert kriege	3	B	C	D	G		0	Orange	nein	Kassel-Witzenhausen
„Alte Küche“ als tierische Produkte Luxus waren, ebenso wie exotische Produkte, wiederaufleben lassen	3	P					0	Orange	nein	Kassel-Witzenhausen
Gemeinschaften fördern -> gemeinsames Kochen/ Kochkurse/ Kräuterspaziergänge/ Obst in der Stadt Spaziergänge	3	E	M	R			0	Orange	nein	Kassel-Witzenhausen
Bio-kette (Fast Food) mit verantwortungsvollen Werten und Firmenphilosophie	3	A	I				0	Blau	nein	Kassel-Witzenhausen
Bio Fastfood aus der Region	3	A	I	J			0	Blau	nein	Kassel-Witzenhausen
Nachhaltigere Außerhausverpflegung (weg von schwerer tierischer Kost - hin zu leichter pflanzlicher Kost)	3	A					0	Blau	nein	Kassel-Witzenhausen
Nachhaltige Verpackung für bio-convenience Produkte	3	I	S				0	Blau	nein	Kassel-Witzenhausen
Ernährungschallenges: Miteinander und Gegeneinander mit Belohnung bei Erreichen der nächsten Stufe -> z.B. Kaufe Biogemüse, was du noch nie gekauft hast und bekoche den anderen mit einem leckeren Rezept	3	E	I	L	M		0	Grün	nein	Kassel-Witzenhausen
Positiv belegen von gesunder Esskultur -> über Trend	3	D	P				0	Rot	nein	Kassel-Witzenhausen
Essbare Stadt: freies Obst, Nüsse, Gemüse für alle ( die Verwaltung gibt ihr okay)	3	E	R				0	Gelb	nein	Hamburg
Eine eigene Geldwährung nur für Bio (Produkt-Kochen-Gärtnern)	3	I					0	Gelb	nein	Hamburg
Ein Bio-Social-Club wo Wissen und Waren geteilt werden	3	E	I				0	Gelb	nein	Hamburg
Menschen zeigen, dass nachhaltige Ernährung mit einem kleinen Budget zu verbinden ist!	3	B	H				0	Gelb	nein	Hamburg
Problem: Menschen verbinden mit Ernährungsumstellung Verzicht; Lösung: Den Begriff „Verzicht“ vermeiden!	3						0	Gelb	nein	Hamburg
Finanzielle Unterstützung für sehr nachhaltige Ernährungsformen	3	F					0	Gelb	nein	Hamburg
Problem: desinteressierte Jugend; Lösung: Jugend nachhaltige Ernährung nahebringen -> sie sind die Zukunft!	3	B					0	Gelb	nein	Hamburg
Fastfood-Ketten (McDonald´s und Co.) abschaffen oder zumindest Filialen einschränken, stattdessen gesunde und nachhaltige Einzelhandel (z.B. Salatbars)	3	A	F				0	Gelb	nein	Hamburg
Mehr Veranstaltungen über alternative Ernährungsformen, z.B. wie veganes Straßenfest	3	D					0	Gelb	nein	Hamburg
Kochen und essen als Genuss und Hobby für Freizeit interessant machen, gemeinsam kochen...	3	E	M	N			0	Gelb	nein	Hamburg
Apps für Information über Nachhaltigkeit beim Einkauf	3	D	L				0	Orange	nein	Hamburg
Kampagnen entwickeln die verdeutlichen das ein anderer Umgang mit Ernährung mir selbst und anderen zugutekommt	3	D					0	Orange	nein	Hamburg
Gläserne Küche in Bio Fast Food-Küchen (alles wird offengelegt, auch Löhne)	3	A					0	Blau	nein	Hamburg
„Solidarprojekte“ -> Lokalgruppen zum gemeinsamen Handeln, Kinder- und Jugendgruppen -> über nachhaltige Ernährung lehren und animieren etwas zu tun	3	B	E				0	Grün	nein	Hamburg
Selber Kochen fördern	3	M					0	Rot	nein	Hamburg
Fast-Food-Ketten stoppen!	3	A	F				0	Rot	nein	Hamburg
Bio kann in regionaler Vernetzung die jeweilige Bevölkerung ernähren	3	I	J				0	Rot	nein	Hamburg
Schockierende Bilder aus Massentierhaltung zeigen – Realität abbilden	3	B	C	D			0	Rot	nein	Hamburg
Leicht verständliche nährwertangaben -> Ampel	3	B					0	Rot	nein	Hamburg
Kampagnen an Schulen/ in Kitas für Bio und nachhaltige Ernährung	3	D	I				0	Rot	nein	Hamburg
Ungesunde Lebensmittel vom Markt nehmen	3	A	F				0	Rot	nein	Hamburg
Bio- Döner-Läden öffnen	3	A	I				0	Gelb	nein	Berlin
Schockbilder von Massentierhaltung auf entsprechenden Produkten	3	B	C	D			0	Gelb	nein	Berlin
Bio-Kochkurse in Schulen für Kinder (& Eltern?!)	3	B	I	M			0	Gelb	nein	Berlin
Frühe Gewöhnung an ausgewogene Ernährung	3	B					0	Gelb	nein	Berlin
Kantinen etc. mit nachhaltiger Ernährung ausstatten	3	A					0	Gelb	nein	Berlin
Kosten senken (wie auch immer) für Bio-Produkte	3	H	I				0	Gelb	nein	Berlin
Preisfragen: gesundes Essen für alle erschwinglich	3	H					0	Gelb	nein	Berlin
Bio-Kurse veranstaltet durch die Krankenkasse (Bonusprogramm)	3	B	I				0	Gelb	nein	Berlin
In der Stadt Lebensmittel „verdörflichen“ -> weniger Supermarkt mehr Händler des Vertrauens aus der Umgebung	3	A	J	R			0	Gelb	nein	Berlin
Ausschluss(zonen) von (Quellen) ungesunder Nahrung	3						0	Gelb	nein	Berlin
Verbot von Fake-Foods („E-Nummer Produkte“)	3	F					0	Gelb	nein	Berlin
Nachhaltige Ernährung als gesellschaftliche Norm einführen z.B. in Filmen o.ä. thematisieren	3	D	E				0	Orange	nein	Berlin
Bio-Diät als Weg zum Top-Body vermarkten	3	D	I				0	Orange	nein	Berlin
Mehr Slow-Food Angebot	3	A					0	Blau	nein	Berlin
Gesündere Kantinen: -lokale Anbieter -nur nachhaltige Produkte	3	A	J				0	Blau	nein	Berlin
Gewünschtes bestärken, Unerwünschtes ungefördert lassen (Boni – z.B. weniger Steuern für nachhaltige und gesunde Lebensmittel / Sanktionen – z.B. höhere Steuern auf ungesunde umweltbelastende Lebensmittel)	3	F					0	Grün	nein	Berlin
Informationen zur Herkunft/ Produktion etc. von Nahrung bereitstellen	3	B	C				0	Rot	nein	Berlin
Offensiv werbende Bio-Super-Frischfood- Kette macht an allen Autobahnraststätten etc. auf	3	A	D	I			0	Rot	nein	Berlin
Gemüse/ Obst als Standardlebensmittel (wieder) etablieren	3						0	Rot	nein	Berlin
Studien zur gesunden Ernährung & deren positiver Wirkung fördern und veröffentlichen	3	B	D				0	Rot	nein	Berlin
Angebote von konventionellen Produkten in Supermärkten minimieren/ besonders kennzeichnen	3	A	F				0	Rot	nein	Berlin
Förderung und Unterstützung für regionalen Bio-Anbau vom Saatgut bis Ladenfläche	3	F	G	I	J		0	Rot	nein	Berlin
Preise angleichen, so dass „Wert“ bezahlt wird -> Bsp. Fleischpreis in „konventioneller“ Haltung anziehen	3	H					0	Rot	nein	Berlin
Werbung stärker zu Gunsten von BIO/ Nachhaltigkeit machen & fördern	3	D	I				0	Rot	nein	Berlin
Im Supermarkt Kisten zusammenstellen mit unterschiedlichen nachhaltigen Produkten. Um darauf aufmerksam zu machen	3	A	D				0	Gelb	nein	Münster
Mehr Direktkooperationen mit Biobauernhöfen und Verbrauchern	3	A	E	G	I		0	Gelb	nein	Münster
Mehr unverpackte LM anbieten (bes. Gemüse)	3	A	S				0	Gelb	nein	Münster
Kennzeichnung regionaler Produkte im Supermarkt	3	C	J				0	Gelb	nein	Münster
In jedem Supermarkt nur Bio	3	A	I				0	Gelb	nein	Münster
Verbrauchern die Folgen vom konventionellen Essen vor Augen führen	3	B					0	Gelb	nein	Münster
Mehr Bio-Vielfalt in Supermärkten	3	A	I				0	Gelb	nein	Münster
Mehr Bio anbieten	3	A	I				0	Gelb	nein	Münster
Bio-Produkte im Supermarkt besser präsentieren!	3	D	I				0	Gelb	nein	Münster
Aufklären, warum Bio „teurer“ ist!	3	B	H	I			0	Gelb	nein	Münster
Bio braucht ein anderes Image (zurzeit Öko und Hipster)	3	D	I				0	Gelb	nein	Münster
Bessere Verteilung der z.B. Bio-Märkte	3	A	I				0	Gelb	nein	Münster
Versteuerte Verfügbarkeit z.B. auf dem Dorf mehr Einkaufsmöglichkeiten bieten, Bauern können Aushang machen	3	A	G				0	Gelb	nein	Münster
Günstigerer Preis von Bio-Lebensmitteln	3	H	I				0	Gelb	nein	Münster
Attraktivität der Bio-Produkte steigern	3	D	I				0	Gelb	nein	Münster
Tierische Lebensmittel müssen mehr kosten	3	H					0	Orange	nein	Münster
Wird gesunde/ nachhaltige Ernährung leichter zugänglich/ einfacher durch das Internet (z.B. online- Bestellung)	3	A					0	Orange	nein	Münster
Lieferdienst Alternativen schaffen; Bio/ Saisonal/ Regional	3	A	I	J	K		0	Blau	nein	Münster
Werbung und Aufklärung und Infos über „richtige, gesunde“ Ernährung	3	B	D				0	Rot	nein	Münster
Küchen auf der Arbeit anbieten -> so kann in der Pause auch gesund gegessen werden	3	M	N				0	Rot	nein	Münster
Gute transparente Bio-Siegel	3	C	I				0	Rot	nein	Münster
Bio muss günstiger werden!	3	H	I				0	Rot	nein	Münster
Gesunde Ernährung vergünstigen	3	H					0	Rot	nein	Münster
Nachhaltige Lebensmittel im Sonderangebot	3	A	D				0	Rot	nein	Münster
Label für konventionelle Produkte, Bioprodukte als Standard	3	I					0	Gelb	nein	Freiburg
„Nachhaltiges“ Kochen mehr in den Alltag bringen (Kochbücher, -kurse, …)	3	M					0	Gelb	nein	Freiburg
Alltagstauglichkeit von nachhaltigem Konsum/ Ernährung -> Kochkurse, etc.	3	M					0	Gelb	nein	Freiburg
Nachhaltige Ernährung muss Trend/ cool/ hip werden	3	D					0	Gelb	nein	Freiburg
Mehr nachhaltiges Angebot in konventionellen Supermärkten	3	A					0	Gelb	nein	Freiburg
Besteuerung von nicht-nachhaltigen Produkten (Preiswandel, Erschwinglichkeit von Bio- Produkten)	3	F	H	I			0	Gelb	nein	Freiburg
Bildung für Nachhaltige Ernährungsformen (Schule, außerschulisch, …)	3	B					0	Gelb	nein	Freiburg
Plattformen schaffen für Austausch (auch interkulturell) „Wie gestalte ich meine Ernährung“	3	B	E	P			0	Blau	nein	Freiburg
Bewusstsein für gesunde und nachhaltige Ernährung stärken -> Ernährungsbildung, Wertewandel, mehr Zeit für Nahrung	3	B	O				0	Rot	nein	Freiburg
Der Bevölkerung finanzielle Mittel für nachhaltige Lebensmittel zur Verfügung stellen	3	F					0	Rot	nein	Freiburg
Best Practice veröffentlichen	4	B					0	Gelb	nein	Dortmund
Info- App	4	B	D				0	Gelb	nein	Dortmund
„Stolperpunkte“ -> Erinnerer, sich bewusst zu werden	4						0	Gelb	nein	Dortmund
Finanzielle Möglichkeiten: würden die Konsequenzen aus konventioneller Landwirtschat in den Preis innbegriffen, wäre Bio nicht teurer. Essen muss den Menschen dieser Preis wert sein -> lieber Verzicht auf andere Dinge	4	H	I	O			0	Gelb	nein	Dortmund
Betriebskantine -> Workshop	4	B					0	Gelb	nein	Dortmund
Attraktive Alternativen	4	A					0	Gelb	nein	Dortmund
Konsequenzen des Konsums aufzeigen -> was wird passieren, wenn ich so weitermache? Ökologisch, ökonomisch, sozial	4	B	C				0	Gelb	nein	Dortmund
Säkulare Gemeindehäuser aufbauen -> leere Kirchen nutzen	4						0	Gelb	nein	Dortmund
Wege zu den Produkten	4	C					0	Gelb	nein	Dortmund
Hühnerhaltung in den Innenhöfen	4	G					0	Gelb	nein	Dortmund
Hinterhofgärten statt Rasenfläche	4	G					0	Gelb	nein	Dortmund
Wissen leicht und klar zugänglich machen	4	B					0	Gelb	nein	Dortmund
Infoveranstaltungen in Bioländern	4	B	I				0	Gelb	nein	Dortmund
Wirtschaftsförderung für Kleinst-/ kleine Unternehmen statt für mittlere/ große Konzerne, so dass Kunden die Auswahl haben	4	A	F				0	Gelb	nein	Dortmund
Konfrontation	4						0	Gelb	nein	Dortmund
Bienenhaltung am Balkon fördern	4	G					0	Gelb	nein	Dortmund
Hilfestellung geben: Wo kann ich anfangen?	4	B	E				0	Gelb	nein	Dortmund
Interessante Spitzenprodukte, die presserelevant sind	4	D					0	Gelb	nein	Dortmund
Food Sharing	4	A	E				0	Gelb	nein	Dortmund
Konfrontation; jeder muss früh informiert werden	4	B					0	Gelb	nein	Dortmund
Balkonbepflanzung fördern mittels Workshops	4						0	Gelb	nein	Dortmund
Netzwerke mit unterschiedlichen Akteuren zum Thema aufbauen, in denen es keine zentrale Moderation/ Hierarchie gibt	4	B	E				0	Gelb	nein	Dortmund
Gelder erhöhen um Projekt nach dem Bottom-up Prinzip zu fördern -> stärkere Lobby schaffen	4	F					0	Gelb	nein	Dortmund
Schulgärten -> essbare Alleen	4	A	B				0	Gelb	nein	Dortmund
„Wünschenswertes Handeln“ spielerisch erlebbar machen (als Theaterstück aufführen, Videoclip via YouTube streamen)	4	B	D				0	Gelb	nein	Dortmund
Urbans Gärtnern auf Freifläche erlauben	4	F	G	R			0	Gelb	nein	Dortmund
Durch Informationen zum Handeln anregen	4	B					0	Gelb	nein	Dortmund
Akzeptanz schaffen -> damit man nicht als „Gutmensch“ bezeichnet wird (abwertend)	4						0	Gelb	nein	Dortmund
Anregungen, Motivation und keine Belehrung mehr	4	B	D				0	Gelb	nein	Dortmund
Angebote zentral bekannt machen (clearing house); Neue Angebote gemeinsam entwickeln	4	A	D				0	Gelb	nein	Dortmund
Niedrigschwellige Angebote	4						0	Gelb	nein	Dortmund
Sinnliches Erleben kultivieren	4	O	P				0	Gelb	nein	Dortmund
Orte, wo Mensch die Produkte bekommen kann, bekannter machen	4	A	D				0	Gelb	nein	Dortmund
Gemeinschaftsküchen	4	E	K				0	Gelb	nein	Dortmund
Gemeinsame Kochabende mit interdisziplinärem Teilnehmerkreis	4	E	K				0	Gelb	nein	Dortmund
Niedrigschwellige Aufklärung (z.B. Anzeigen/ Plakate)	4	B	D				0	Gelb	nein	Dortmund
Flashmobs	4	D	E				0	Gelb	nein	Dortmund
Verbot/ Besteuerung nicht-nachhaltiger Produkte	4	F					0	Gelb	nein	Dortmund
Kultur des Bewusstseins der Reflektion fördern (Hinterfragen, Diskutieren, Lösen/ Handeln)	4	O	P				0	Orange	nein	Dortmund
Ein einzelner Vorschlag an der richtigen Stelle kann schon Großes bewegen	4						0	Orange	nein	Dortmund
Schlachthofbesichtigung	4	B					0	Orange	nein	Dortmund
Ernährungsfragen verbrauchen Zeit, die unser Wirtschaftssystem zu einer knappen Ressource macht -> Entfremdung	4	Q					0	Orange	nein	Dortmund
Soziale Marktwirtschaft -> mehr staatlicher Eingriff	4	F					0	Orange	nein	Dortmund
Global denken: Bio-Kartoffeln aus Ägypten in Deutschland unnütz -> allen Menschen ein nachhaltiges Leben ermöglichen	4	A	I				0	Orange	nein	Dortmund
Verflechtungen, Abhängigkeiten darstellen (z.B. systems dynamics)	4	B	C				0	Orange	nein	Dortmund
Bewusstsein für die Einfachheit des Wohlfühlens schaffen	4	O					0	Orange	nein	Dortmund
Die Grenzen der Technik aufzeigen (Natur muss gepflegt, nicht beherrscht werden)	4	B					0	Orange	nein	Dortmund
Bewusstsein schaffen, dass die Natur regional und saisonal das Wichtigste bereitstellt	4	B	J	K	O		0	Orange	nein	Dortmund
Projekt: Schreib/ Zeig auf, was du isst: „Zeig, wer du bist“	4						0	Orange	nein	Dortmund
Wissensvermittlungen von biologischen Zusammenhängen/ Kreisläufen	4	B					0	Orange	nein	Dortmund
Kreislaufwirtschaft, perfekte Nachhaltigkeit, geben und nehmen im Einklang, perfekte Nachhaltigkeit ist Utopie und schwer zu erreichen	4						0	Orange	nein	Dortmund
Gemeinschaft	4	E					0	Orange	nein	Dortmund
Konfrontation, Aufklärung	4	B					0	Orange	nein	Dortmund
Raststätten/ Ruheräume in der Stadt schaffen	4	R					0	Blau	nein	Dortmund
Noch mehr Kommunikation (Social Media -> Bsp. foodsharing)	4	B	D				0	Blau	nein	Dortmund
Kochbücher, die alle diese nachhaltigen Rezepte/ Aspekte beinhalten	4	B	M				0	Blau	nein	Dortmund
Wenn Fleisch gekauft wird zum Beispiel darauf aufmerksam machen, womit Schweine/ Hühner/ etc. gefüttert werden, oder mit wie viel Wasser Getreide gegossen wird	4	C					0	Blau	nein	Dortmund
Firmen und alternative Caterer zusammenbringen	4	E					0	Blau	nein	Dortmund
Keine Verbote sondern Gebote!	4	F					0	Blau	nein	Dortmund
Saft/ Obststände	4	A					0	Blau	nein	Dortmund
Öffentliches Picknick/ Grillen/ Kessel/ Lagerfeuer	4	A	D				0	Blau	nein	Dortmund
Food Trucks (organisch)	4	A	I				0	Blau	nein	Dortmund
Gemeinsam bewusst essen	4	E	N	O			0	Blau	nein	Dortmund
Street Food Festivals	4	A	D				0	Blau	nein	Dortmund
Lernen und Lehrende müssen viel mehr Wertschätzung bekommen	4	E	O				0	Grün	nein	Dortmund
Interdisziplinäre Informationsveranstaltungen (leicht und spielerisch)	4	B					0	Grün	nein	Dortmund
Verantwortlich handeln = Pflicht und Regeln (Bsp. öffentliche Fläche darf frei genutzt und gestaltet werden)	4						0	Grün	nein	Dortmund
Kunde (alle Wirtschaftszwecke solidarisch organisieren, neue logistische Prozesse), Landwirt Unternehmer (noch keine Notiz)	4						0	Grün	nein	Dortmund
Gemeinsam kochen und essen	4	E	M	N			0	Grün	nein	Dortmund
Urban Gardening, SPIN-Farming, small plot intensive gardening	4	G	R				0	Rot	nein	Dortmund
Direkte Kontakte und Erfahrungsaustausch durch offene Zentren/ Infrastrukturen fördern	4	B	E				0	Rot	nein	Dortmund
Aufklärung über ungesunde Nahrungsmittel und auf sich anpassen	4	B					0	Rot	nein	Dortmund
Mit kreativen Aktionen Alternativen bieten/ aufzeigen	4	A	D				0	Rot	nein	Dortmund
Werbung: „Mund zu Mund“	4	D					0	Rot	nein	Dortmund
Einzigartigkeit jedes Lebensmittels in der Saison und Region hervorheben, Spiel und Erfahrung (Info in Schulen/ Lebensmittelläden)	4	B	D	J	K		0	Rot	nein	Dortmund
Staatliche Förderung von Eigenanbau (für Pflanzen)	4	F	G				0	Rot	nein	Dortmund
Klar und überprüfbare/ geprüfte Informationen	4	C					0	Rot	nein	Dortmund
Gesetze für Direktvermarktung (Schutzzölle?)	4	A	F				0	Rot	nein	Dortmund
Globale Gesetzgebung Strafen für Firmen bei Umweltverschmutzung und Förderung für Nachhaltigkeit	4	F					0	Rot	nein	Dortmund
Vorteile für Unternehmen herausstellen (Vertrauen, Kundenbindung)	4	B	D				0	Rot	nein	Dortmund
Kontrollen bei nachhaltiger Produktion erfordern Arbeitsplätze auch als Kaufgrund	4						0	Rot	nein	Dortmund
Unterstützung/ Plattform für Kleinunternehmer und Newcomer in Sachen Lobbyarbeit	4						0	Rot	nein	Dortmund
Essenskultur aufwerten	4	P					0	Gelb	nein	Kassel-Witzenhausen
Kochgruppen/ Ernährungsgruppen bilden	4	E	M				0	Gelb	nein	Kassel-Witzenhausen
Von Klein auf: Kindergärten, Schulen, Mensen, Kantinen	4	A					0	Gelb	nein	Kassel-Witzenhausen
Soli- Obstwiesen (Mundraub)	4	A	E				0	Gelb	nein	Kassel-Witzenhausen
Gewissens-App	4	D					0	Gelb	nein	Kassel-Witzenhausen
Faire Entlohnung für faire (Produktions-)Bedingungen	4	F					0	Gelb	nein	Kassel-Witzenhausen
Nudges	4						0	Gelb	nein	Kassel-Witzenhausen
Containern legalisieren	4	F					0	Gelb	nein	Kassel-Witzenhausen
Solawi	4	E	G				0	Gelb	nein	Kassel-Witzenhausen
Ernährungsrat	4	F					0	Gelb	nein	Kassel-Witzenhausen
Vernetzung von Wissenden mit Nicht-wissenden durch Mentorenprogramme	4	B	E				0	Gelb	nein	Kassel-Witzenhausen
Keine konventionelle Landwirtschaft mehr	4	F	G				0	Gelb	nein	Kassel-Witzenhausen
Ernährungsrat	4	F					0	Gelb	nein	Kassel-Witzenhausen
Schilder mit Wasser/ CO2 Verbrauch direkt neben Lebensmittel im Supermarkt	4	C	D				0	Gelb	nein	Kassel-Witzenhausen
Tierbilder auf Fleischpackungen wie Zigarettenpackung	4	B	C	D			0	Gelb	nein	Kassel-Witzenhausen
Ernährungsdokus als Prämie für Einkäufe	4	B	D				0	Gelb	nein	Kassel-Witzenhausen
Verbraucherbildung/ -informationen in Supermärkten (LEH)	4	B					0	Gelb	nein	Kassel-Witzenhausen
Transparenz bzgl. Produktionsprozesse „Schock-Fotos“ à la Zigarettenpackungen??	4	B	C	D			0	Gelb	nein	Kassel-Witzenhausen
Weniger Auswahl macht die Entscheidung einfacher! -> Angebot, wer gestaltet das?	4	A					0	Gelb	nein	Kassel-Witzenhausen
„Konsumenten“ mit einbeziehen -> persönliche Story muss her	4						0	Gelb	nein	Kassel-Witzenhausen
Ökonomische Zwänge verhindern oft eine „gute“ Auswahl -> dem „Markt“ die Zähne brechen?	4	A	F				0	Gelb	nein	Kassel-Witzenhausen
Diskurs zwischen Verbrauchern und Erzeugern fördern/ Treffpunkte schaffen	4	B	E				0	Gelb	nein	Kassel-Witzenhausen
„Einkaufshilfen“, Rezepte -> Barrieren abbauen	4	B	L				0	Gelb	nein	Kassel-Witzenhausen
Motivationsanreize	4						0	Gelb	nein	Kassel-Witzenhausen
Einblicke in Produktion	4	C	G				0	Gelb	nein	Kassel-Witzenhausen
Konfrontation	4	B					0	Gelb	nein	Kassel-Witzenhausen
Werbung für „Ungesundes“ -> Risiko aufzeigen wie bei Zigaretten	4	B	D				0	Gelb	nein	Kassel-Witzenhausen
Mehr Wissen über die Produkte -> Transparenz	4	B	C				0	Gelb	nein	Kassel-Witzenhausen
Zutatenlisten – mit größerem Stellenwert	4	C					0	Gelb	nein	Kassel-Witzenhausen
Lebensmittelverpackungen mit Hinweisen	4	B	C				0	Gelb	nein	Kassel-Witzenhausen
Versorgung ohne internationale Importe	4	A	F				0	Gelb	nein	Kassel-Witzenhausen
Regionale Läden	4	A	J				0	Gelb	nein	Kassel-Witzenhausen
Aufklärung	4	B					0	Gelb	nein	Kassel-Witzenhausen
Durch monetären Anreiz z.B. günstigere Krankenversicherungsbeiträge, subventionierte Obst- und Gemüseprodukte	4	F	H				0	Gelb	nein	Kassel-Witzenhausen
„Soziale Kontrolle“ innerhalb Familien und WG-Zusammenhänge	4	E					0	Gelb	nein	Kassel-Witzenhausen
Fläche pro Kopf für bedarfsgerechte Ernährung	4						0	Gelb	nein	Kassel-Witzenhausen
Versorgung „zeitgenössischer“ Lebensweisen: Single, Dinkis, Pendler	4	A					0	Gelb	nein	Kassel-Witzenhausen
Wissen weiter kommunizieren	4	B					0	Gelb	nein	Kassel-Witzenhausen
Luxus: Ernährung und Nahrung	4						0	Gelb	nein	Kassel-Witzenhausen
Ernährung von Ärzteseite mehr gewichten	4	B					0	Gelb	nein	Kassel-Witzenhausen
Ernährungsbewusstsein mit kulturellen Aktionen (Bsp. Gemeinschaftsprojekt von Künstlern aus allen Ländern fördern: Komponieren, Dichten, Malen)	4	D	O	P			0	Orange	nein	Kassel-Witzenhausen
Anti-Konsumgesellschaft -> Trend; Wie viel Essen brauche ich wirklich -> weniger wegwerfen	4	A	D	E			0	Orange	nein	Kassel-Witzenhausen
Banderolen statt Plastikverpackungen zur Differenzierung von Lebensmitteln	4	S					0	Orange	nein	Kassel-Witzenhausen
Konkrete Handlungsvorschläge machen und deren Nachhaltigkeitsimpact anzeigen (low vs. high)	4	B					0	Orange	nein	Kassel-Witzenhausen
Durch eindeutige und selbsterklärende Labels Rückverfolgbarkeit ermöglichen	4	B	C				0	Orange	nein	Kassel-Witzenhausen
Geplanter Obsoleszenz entgegenwirken (Gesetze, Zertifikat, Prämien)	4	F					0	Orange	nein	Kassel-Witzenhausen
Wie gelingt eine gerechte Verteilung von Nahrungsmitteln?	4						0	Orange	nein	Kassel-Witzenhausen
Mehr Meditationskurse anbieten in Schulen/ Unternehmen, um Glück/ Zufriedenheit in sich und nicht in äußeren Sachen zu finden	4						0	Orange	nein	Kassel-Witzenhausen
Füreinander sorgen mit gesundem Essen	4	E					0	Blau	nein	Kassel-Witzenhausen
Esskultur (wieder-) herstellen	4	P					0	Blau	nein	Kassel-Witzenhausen
Biomüll Verwertung in Stadt-Gärten	4	R					0	Blau	nein	Kassel-Witzenhausen
Alternativkonsum für Feste und Feiern (z.B. Weihnachtsbraten)	4	A	E				0	Blau	nein	Kassel-Witzenhausen
Gemeinschaftlichkeit beim Essen und Kochen	4	E	M	N			0	Blau	nein	Kassel-Witzenhausen
Definition zu Regionalität entwickeln	4	J					0	Blau	nein	Kassel-Witzenhausen
Rezeptideen Inspirationen	4	B					0	Blau	nein	Kassel-Witzenhausen
Soziale Kontrolle	4	E					0	Blau	nein	Kassel-Witzenhausen
Rezeptideen austauschen (z.B. vegane Kuchen)	4	B	E				0	Blau	nein	Kassel-Witzenhausen
Auf Verbrauch(er) angepasster Vertrieb	4	A					0	Blau	nein	Kassel-Witzenhausen
Kommunikation, Akzeptanz	4	B					0	Grün	nein	Kassel-Witzenhausen
Bildungsarbeit/ Erlebnispädagogik	4	B					0	Grün	nein	Kassel-Witzenhausen
Permakultur „Showflächen“ auf Grünflächen in Städten	4	G	R				0	Grün	nein	Kassel-Witzenhausen
Bildung: Bewusstsein und Information über Nahrung -> Nähe, Identifikation	4	B	O				0	Rot	nein	Kassel-Witzenhausen
Begrenzter Import	4	A	F				0	Rot	nein	Kassel-Witzenhausen
Subventionierung	4	F					0	Rot	nein	Kassel-Witzenhausen
Förderung von kleinstrukturierter Landwirtschaft mit größerer Einbeziehung der Verbraucher	4	F	G	E			0	Rot	nein	Kassel-Witzenhausen
Unterstützung von Kleinunternehmern auch durch Verbraucher	4	G	E				0	Rot	nein	Kassel-Witzenhausen
Negativ Gentechnikkennzeichnung	4	C	F				0	Rot	nein	Kassel-Witzenhausen
EU-Normen nachhaltig gestalten (und z.B. Lebensmittelabfälle vermeiden)	4	F					0	Rot	nein	Kassel-Witzenhausen
Anzahl des Spritzens auf Produkt kennzeichnen (vielleicht der Durschnitt)	4	C					0	Rot	nein	Kassel-Witzenhausen
Kleinbäuerliche Strukturen stärken	4	G					0	Rot	nein	Kassel-Witzenhausen
Überdüngung verbieten -> Richtlinien eventuell strenger	4	F					0	Rot	nein	Kassel-Witzenhausen
Direktvermarktung: Landwirt -> Kundenkontakt	4	A	G				0	Rot	nein	Kassel-Witzenhausen
Food Chains verkürzen (z.B. Food Coop)	4						0	Rot	nein	Kassel-Witzenhausen
Bildungsarbeit unabhängig von z.B. großen Konzernen (ebenso Forschung)	4	B					0	Rot	nein	Kassel-Witzenhausen
Veröffentlichungspflicht aller Forschung (innerbetrieblich schwierig)	4	B					0	Rot	nein	Kassel-Witzenhausen
Schutz regionaler Produktion ( z.B. Label…)	4	F	J				0	Rot	nein	Kassel-Witzenhausen
Auf die Macht der Konzerne aufmerksam machen	4	B					0	Rot	nein	Kassel-Witzenhausen
Förderung von Bewegung in allen Altersklassen	4						0	Rot	nein	Kassel-Witzenhausen
Ambivalente Berichterstattung fördern	4	B	D				0	Rot	nein	Kassel-Witzenhausen
Transparente Politik	4	C	F				0	Rot	nein	Kassel-Witzenhausen
Abschaffung von Plastikverpackung	4	S					0	Rot	nein	Kassel-Witzenhausen
Entlohnung konkreter Umweltmaßnahmen in Produktion/-skette	4						0	Rot	nein	Kassel-Witzenhausen
Globale Änderung der politischen Mächte ansteuern	4	F					0	Gelb	nein	Hamburg
Bildung (Bildung für nachhaltige Entwicklung) von klein auf	4	B					0	Gelb	nein	Hamburg
Bedürfnisse reduzieren – am Ende des Tages muss die Theke der Bäckerei nicht voll sein	4	A					0	Gelb	nein	Hamburg
Mensen/ Kantinen in Betrieben mit regionalen/ sozialen Produkten	4	A	J				0	Gelb	nein	Hamburg
Warenangebot reduzieren	4	A					0	Gelb	nein	Hamburg
Mehr Vernetzungen bilden	4	B					0	Gelb	nein	Hamburg
Problem: Gemütlichkeit; Lösung: Unterstützung, Motivation -> Werbung, soziale Medien	4	D					0	Gelb	nein	Hamburg
Problem: Preis (zu hoch); Lösung: Steuererleichterungen für Personen, die nachhaltig Leben -> nachhaltige Produkte konsumieren	4	F	H				0	Gelb	nein	Hamburg
Problem: nicht nachhaltige Produkte (-> Industrien) werden zu stark unterstützt; Lösung: Subventionen streichen/ kürzen -> nachhaltige Produkte subventionieren	4	F					0	Gelb	nein	Hamburg
Nachhaltig/ bio/ regional muss normal sein/ werden. Nicht-nachhaltig die „Ausnahme“	4	I	J				0	Gelb	nein	Hamburg
Rahmenbedingungen neu setzen externe Kosten in Produkte einpreisen. Nicht-nachhaltig darf nicht billiger sein	4	H					0	Gelb	nein	Hamburg
Aufklärung und Vermittlung ethischer Werte in der Schule	4	B					0	Gelb	nein	Hamburg
Menschen orientieren sich an „Vorbildern“ -> Promis, Politiker sollen einen nachhaltigen Lebensstil vorleben	4	D	E				0	Gelb	nein	Hamburg
Bildung und Aufklärung früh beginnen	4	B					0	Gelb	nein	Hamburg
Supermärkte mit saisonalen Produkten bzw. stärkere Ausschilderung	4	A	K				0	Gelb	nein	Hamburg
Ansätze wie: „Vegan Taste Week“ fördern!	4	D					0	Gelb	nein	Hamburg
Bewusstsein fördern, was in Lebensmitteln drinsteht!	4	O					0	Gelb	nein	Hamburg
Bewusstwerden, dass so ein hoher Verbrauch an tierischen Lebensmittel nicht „schon immer so war“!	4	O					0	Gelb	nein	Hamburg
Mehr Praxis (erleben), weniger Theorie (zerreden)	4	B					0	Gelb	nein	Hamburg
Weniger Ideologie (wer ist der bessere Mensch)	4						0	Gelb	nein	Hamburg
Einfache Heuristiken, die für jeden einsichtig sind	4						0	Gelb	nein	Hamburg
Wenn ich alt bin, gibt es ein Bio-Ernährungssystem, dass mich versorgt	4	I					0	Gelb	nein	Hamburg
Problem: Werbung und Verführung von Kunden; Lösung: Werbung gegen Verführung!	4	D					0	Gelb	nein	Hamburg
Menschen wissen, was mit Tieren und Umwelt geschieht -> es ihnen oft zeigen!	4	B					0	Gelb	nein	Hamburg
Problem: zu wenige Optionen -> zu unbekannt; Lösung: mehr Optionen, Werbung	4	A	D				0	Gelb	nein	Hamburg
Mehr Menschen den Zugang zu Wissen und Erfahrung sammeln bieten	4	B					0	Gelb	nein	Hamburg
Chemieindustrie kontrollieren, z.B. Pestizide Herstellung und Anwendung	4	F					0	Gelb	nein	Hamburg
Wegweiser erstellen (Orientierungslosigkeit)	4						0	Orange	nein	Hamburg
Gemeinsam findet man schneller aus dem Labyrinth -> Netzwerk	4	E					0	Orange	nein	Hamburg
Lebensmittelkauf im Westen reduzieren	4	L					0	Orange	nein	Hamburg
Lebensmittelauswahl reduzieren, keine Discounter mehr!	4	A					0	Orange	nein	Hamburg
Achtgeben auf Entwicklungsländer: keine Ausbeutung mehr -> mehr Spenden und Anbaumöglichkeiten	4	F					0	Orange	nein	Hamburg
Problem: „Angst“ etwas zu verändern; Lösung: Mut zusprechen -> Inspiration und Motivation	4						0	Orange	nein	Hamburg
Dem Westen die Situation in Entwicklungsländern vor das Auge bringen -> Wissen, zum Handeln animieren	4	B	F				0	Orange	nein	Hamburg
Vielfalt und Kreislaufwirtschaft statt Monokultur (Bsp. Permakultur)	4	G					0	Orange	nein	Hamburg
Immer wieder darauf hinweisen, dass die Möglichkeiten „unseres“ Planeten endlich (!) sind	4	B					0	Orange	nein	Hamburg
Immer wieder die persönliche Mitverantwortung für „unseren“ Planeten deutlich machen	4	B					0	Orange	nein	Hamburg
Immer wieder auf die einmalige Chance hinweisen, die unser Planet dem „Leben“ bietet	4	B					0	Orange	nein	Hamburg
Auf Menschen zugehen, nicht zu verurteilen, sondern Möglichkeiten aufzeigen	4	E					0	Orange	nein	Hamburg
Problem: viele haben nicht das Gefühl, dass sie allein etwas verändern können; Lösung: durch Organisation zeigen, dass viele dabei sind	4	E					0	Orange	nein	Hamburg
Problem: viele verdrängen die Zeit und die Probleme; Lösung: zeigen, dass Probleme entstehen/ bald entstehen werden	4	B					0	Orange	nein	Hamburg
Zertifizierung auf Prüfstand stellen	4	F					0	Blau	nein	Hamburg
Transparenz	4	C					0	Blau	nein	Hamburg
Informationen über Produkte vernetzen -> Wo bekomme ich was?	4	B	E				0	Blau	nein	Hamburg
Vegan-Check (Woher kommt Soja? Gentechnikfrei? Welche E-Nummern? Lebensmittel-Deklaration -> Ampel)	4	B	C				0	Blau	nein	Hamburg
Bodenfruchtbarkeit erhalten durch Kreislaufwirtschaft	4	G					0	Blau	nein	Hamburg
„Es ist zu spät“ -> Demotivation; Zeigen, dass es nie zu spät ist um etwas zu verändern/ besser zu machen	4	B					0	Blau	nein	Hamburg
Alternativen Schaffen!	4						0	Blau	nein	Hamburg
Gemeinsame Ziele und Kriterien erarbeiten und festlegen; Gemeinsam umsetzen, bei wem einkaufen; Gemeinsam Kochen und genießen	4	E	L	M	N		0	Blau	nein	Hamburg
Arbeitgeber Verantwortung für die Gesundheit der Arbeitnehmer einfordern (gesetzliche Regelung)	4	F					0	Blau	nein	Hamburg
Lokal, regional und saisonal; Info und Netzwerke (z.B. Regionalwert AG)	4	B	E	J	K		0	Blau	nein	Hamburg
Urban Gardening fördern; Bio/ regional/ Gemeinschaft	4	E	G	I	J	R	0	Blau	nein	Hamburg
Mehr Kontrolleure für mehr Transparenz	4	C					0	Blau	nein	Hamburg
Erfahrungsmöglichkeiten bieten (WOOF, Hofbesuche, Mitarbeit)	4	B	G				0	Grün	nein	Hamburg
Transparenz und schnelle Vernetzung durch z.B. App	4	C	D				0	Grün	nein	Hamburg
Sensible Lebensphasen (Schwangerschaft etc.) durch Praxis- und Lernerfahrungen begleiten	4	B					0	Grün	nein	Hamburg
Problem: Ungewissheit, nicht ausreichendes Wissen; Lösung: Podiumsdiskussionen, Veranstaltungen wie Unterricht	4	B					0	Grün	nein	Hamburg
Transdisziplinäre Arbeit	4	E					0	Grün	nein	Hamburg
Mindestlohn erhöhen	4	F					0	Rot	nein	Hamburg
Staat vor privat	4	F					0	Rot	nein	Hamburg
Preis über Kaufanreize	4	H					0	Rot	nein	Hamburg
Öffentliche Aufträge auf Basis von Qualität	4	B	I				0	Rot	nein	Hamburg
Transparenz fördern	4	C					0	Rot	nein	Hamburg
Biosprit verbieten -> Kein Energiemais mehr!	4	F					0	Rot	nein	Hamburg
Budgets für Schulen und Kitas erhöhen	4	F					0	Rot	nein	Hamburg
Verlogene Werbebotschaften verbieten	4	D	F				0	Rot	nein	Hamburg
Lokalisierung der Nahrungsproduktion	4	G	J				0	Rot	nein	Hamburg
Verbot Grundwasser für Landwirtschaft zu nutzen	4	F	G				0	Rot	nein	Hamburg
Verfremdung von Werbung	4	D					0	Rot	nein	Hamburg
Höhere Steuersätze/ MwSt./ Einkommenssteuer für konventionelle Produkte	4	F					0	Rot	nein	Hamburg
Wahrheitsgemäße Fakten zu Landwirtschaft in der Schulbildung	4	B					0	Rot	nein	Hamburg
Transparente Preispolitik und ehrliche Konkurrenz	4	C	H				0	Rot	nein	Hamburg
Flugpreise erhöhen	4	F					0	Rot	nein	Hamburg
Qualität statt Quantität fördern	4	F	G				0	Rot	nein	Hamburg
Gewinnmaximierung steht nicht vor Naturschutz	4	F					0	Rot	nein	Hamburg
Bio-Zertifikate kostenlos -> über Kunstdünger-/ Pestizidsteuer finanzieren	4	F	I				0	Rot	nein	Hamburg
Freibeträge für Biolandwirtschaft	4	F	I				0	Rot	nein	Hamburg
Subventionen für Bio-Landbau und Nachhaltigkeit	4	F	I				0	Rot	nein	Hamburg
Kleinvereine bilden von Mittelstandunternehmen (gegen Globalisierung)	4	E					0	Rot	nein	Hamburg
Tierschutzvereine und -Initiativen schaffen und zusammenlegen	4	E					0	Rot	nein	Hamburg
Bodenpreise senken	4	F					0	Rot	nein	Hamburg
Diverse Angebote an lokalen Produkten mit Rabatten du Aktionen bewerben	4	A	D	J			0	Rot	nein	Hamburg
GMOs verhindern und Saatdiversität fördern	4	F					0	Rot	nein	Hamburg
Schulunterricht	4	B					0	Gelb	nein	Berlin
Ernährungslehre	4	B					0	Gelb	nein	Berlin
Staatliche (EU und D) Förderung von nachhaltiger Produktion	4	F	G				0	Gelb	nein	Berlin
Förderung (Preis? Was wird derzeit subventioniert und sollte stattdessen…)	4	F	H				0	Gelb	nein	Berlin
Preis der Nahrungsmittel nach Umweltimpact ausrichten	4	H					0	Gelb	nein	Berlin
Gemeinschaft fördern (weg von Ellenbogengesellschaft…)	4	E					0	Gelb	nein	Berlin
Aufklärung	4	B					0	Gelb	nein	Berlin
Preisspanne konventionell - Bio	4	H	I				0	Gelb	nein	Berlin
Kostendifferenz von gesunden/nachhaltigen Produkten minimieren	4	H					0	Gelb	nein	Berlin
Mehr Aufklärungsarbeit über Produkte, Herstellung & Konsequenzen für Tiere / Umwelt (& Alternativen)	4	B					0	Gelb	nein	Berlin
Kennzeichnung konventioneller Produkte	4	C					0	Gelb	nein	Berlin
Infos auf Produkten ggfs. Informationspflicht (Label) -> Nicht nur Zeichen wie „Bio“	4	B	C				0	Gelb	nein	Berlin
Mehr Förderung von Banken für Bio-Start-ups etc.	4	F	I				0	Gelb	nein	Berlin
Allmende: Wissen für alle verfügbar	4	B	E				0	Gelb	nein	Berlin
Preis vs. „Wenig Zeit“	4	H	Q				0	Gelb	nein	Berlin
Es gilt leider inzwischen als „unnormal“ sich sein Essen selbst zuzubereiten	4	M					0	Gelb	nein	Berlin
Preisschild mit „echtem“ Preis -> Gewissensappell	4	B	C	H			0	Gelb	nein	Berlin
Förderung lokaler Märkte	4	A	J				0	Gelb	nein	Berlin
Zu viele Optionen machen Entscheidung schwer -> gesetzliche Angebotsregulierung/ Herkunftsregulierung	4	A	F				0	Gelb	nein	Berlin
Direktverkauf	4	A	G				0	Gelb	nein	Berlin
(Breiteres) Angebot an nachhaltigen Verhaltensoptionen schaffen, z.B. subsidiäre Kreisläufe -> Läden vor Ort müssen regionales, ökologisches Angebot haben	4	A	I	J			0	Gelb	nein	Berlin
Preistransparenz: Anteil Marke/ Qualität	4	C	H				0	Gelb	nein	Berlin
Image von Nachhaltigkeit/ Bio-Produkten	4	D	I				0	Gelb	nein	Berlin
Wie bei „der Weg einer Jeans“ – Der Weg einer Hühnchenbrust…Food Inc./ Made in?	4	B	D				0	Gelb	nein	Berlin
Mehr Vertrauen in & Nachvollziehbarkeit von nachhaltigen Produkten	4	B	C				0	Gelb	nein	Berlin
Instant – Befriedigungskultur in verschiedenen gesellschaftlichen Zusammenhängen hinterfragen	4	P					0	Gelb	nein	Berlin
Begeisterung/ Interesse steigern, vermitteln	4						0	Gelb	nein	Berlin
Massentierhaltungssteuer einführen!	4	F					0	Gelb	nein	Berlin
Zugängliches Angebot für Alle	4	A					0	Gelb	nein	Berlin
Allmende: Sozietät/ soziale Beteiligung und Verantwortung und Wirkung/ erleben vs. Entfremdung aus Kreisläufen	4	B	E				0	Gelb	nein	Berlin
Mehr Aufklärung in Schulen	4	B					0	Gelb	nein	Berlin
Wer braucht Label/ Siegel, wenn ökologisch/ nachhaltiges Handeln Gesetz/ Vorschrift ist	4	F					0	Orange	nein	Berlin
Nicht saisonale Produktpalette stark minimieren	4	A	K				0	Orange	nein	Berlin
Echte Preise	4	H					0	Orange	nein	Berlin
Mindestanteil von „Blumen-Flächen“ für Bienen	4	F					0	Orange	nein	Berlin
Projektwoche z.B. in Schule, „1 Woche lang leben aus der Natur“ -> Beseitigung Entfremdung	4	B					0	Orange	nein	Berlin
Ist Normierung immer sinnvoll? – Wiedererkennungswert geht verloren, wenn nur nach „Standard-Typ gesucht wird	4	A					0	Orange	nein	Berlin
Ökologische Erziehung ab Kindergarten, Schule; Über mehr TV-Dokumentationen -> wie können möglichst viele erreicht werden?	4	B	D				0	Orange	nein	Berlin
Gesetze zum Schutz des Lebens (Tierrecht/ -gerechtigkeit)	4	F					0	Orange	nein	Berlin
Durch Aufklärungsarbeit schon in Schulen/ Kindergärten auf die Endlichkeit der natürlichen Ressourcen aufmerksam machen -> Perspektivenwechsel	4	B					0	Orange	nein	Berlin
Transferwissen in Schulen fördern, indem in der Vergangenheit nach tragfähigen Verhaltensweisen geschaut wird. (Bsp. W. v. Siemens…)	4	B					0	Orange	nein	Berlin
Händler = Lehrer	4	B					0	Orange	nein	Berlin
Regionale Produkte & Anbieter mit moderner/ städtischer Welt verknüpfen (Internet / Lieferservice/ „Land“-Shops)	4	A	J	R			0	Blau	nein	Berlin
Runder Tisch; Mitarbeiter involvieren	4	E					0	Blau	nein	Berlin
Bewusstsein bei Arbeitgebern schaffen & deren Unterstützung einholen	4	O					0	Blau	nein	Berlin
Bild des Kreislaufs (Ernährung) in den Köpfen verankern -> Bildung, Werbung, Information (staatliche Aufgabe!)	4	B	D	F			0	Blau	nein	Berlin
Druck auf Lieferanten erhöhen, dass nur nachhaltige Produkte geliefert werden	4	A					0	Blau	nein	Berlin
Z.B. Solidarische Landwirtschaft als Alternative zu kapitalistischen Produktions-/ Eigentums Systemen	4	E	G				0	Blau	nein	Berlin
Direktvermarktung & Bauern-/ Produzenten Märkte (z.B. Handwerk, Bäcker, ...)	4	A	G				0	Blau	nein	Berlin
Küchen zum Kochen in den Unternehmen – eine umsetzbare Möglichkeit?	4	M					0	Blau	nein	Berlin
Austausch/ Netzwerk; Stadt - Land (Kultur, Lebenswelten kennenlernen)	4	E					0	Blau	nein	Berlin
Verantwortung zurückgeben an Konsumenten	4						0	Blau	nein	Berlin
Wertschätzung steigern für das Leben im Jetzt	4	B	O				0	Blau	nein	Berlin
BAD ≠ Easy - Make healthy food accessible	4	A					0	Blau	nein	Berlin
Auf Arbeit: Teams machen abwechselnd Mittagessen für alle! (Arbeitgeber stellen frei dafür)	4	E	M				0	Blau	nein	Berlin
Prinzip der staatlichen Förderung (z.B. EEG) für Selbstversorgerhöfe	4	A	F	G			0	Blau	nein	Berlin
Gemeinschaft	4	E					0	Grün	nein	Berlin
Die Möglichkeit zu Essen zu Hause geben/ ausweiten	4	N					0	Rot	nein	Berlin
Werbung, wie bei Tabak auch, stärker leiten: Exotisches nicht attraktiver	4	D					0	Rot	nein	Berlin
Mehr Flächen pflichtmäßig offen lassen für alle, z.B. auch für Wildblumen	4	F					0	Rot	nein	Berlin
Öffentlicher Diskurs und Anerkennung der Notwendigkeit von Nachhaltigkeit	4	B	E				0	Rot	nein	Berlin
Aufklärung durch Fernsehreportagen	4	B					0	Rot	nein	Berlin
Zeitreichtum - neuer gesellschaftlicher Standard, geringere Wochenarbeitszeit (½ Arbeit/ ½ Geld = Zeit! für die wichtig & unwichtig scheinende Dinge)	4	Q					0	Rot	nein	Berlin
Keine Verschwendung -> Wiederverwertung (höchst mögliche); Ausnahmeklauseln ermöglichen z.B. Gesundheit/ Hygiene vs. Verpackungsmüll & Reste (Rechtliche Haftung aufheben; z.B. Resteverwertung, Verantwortung bei Nutzern; Bsp. Lebensmittel retten)	4	F					0	Rot	nein	Berlin
Siegel für konventionelle Produkte einführen, welches teurer ist als das Biosiegel	4	I					0	Rot	nein	Berlin
Bio-soft-Soap auf arte.tv/ YouTube anbieten	4	D	I				0	Rot	nein	Berlin
Gerade „Neueinsteigern“ aber auch langjährigen Bauern die Vorteile von biologischem Saatgut/ Nachhaltigkeit nahebringen (auch Aufgrund des Ausschöpfen ihrer Quellen)	4	B	G	I			0	Rot	nein	Berlin
Steuern unterschiedlich staffeln: -> Öko-Bauern durch niedrigere Steuern fördern und unterstützen -> konventionelle Bauern müssen extra Steuer entrichten, sodass es unrentabel wird	4	F	G	I			0	Rot	nein	Berlin
Schulische Aufklärung	4	B					0	Rot	nein	Berlin
Lebensmittel nicht zweckentfremden	4						0	Rot	nein	Berlin
Nahrungsmittelpreise auf „gesundem Niveau“ und Menschen aufklären (keine „falschen“ Subventionierungen)	4	F	H				0	Rot	nein	Berlin
Regional erzeugtes Essen wird im Job und anderswo in einem gemütlichen sozial animierenden Event gemeinsam genossen	4	E	J	N			0	Rot	nein	Berlin
Produkte (nachhaltige) subventionieren	4	F					0	Rot	nein	Berlin
Direktvermarktung in der Region	4	A	J				0	Rot	nein	Berlin
Auflistung süchtig machender Stoffe und gesundheitliche Auswirkung auf Verpackungen	4	B	C				0	Rot	nein	Berlin
Fixierung des Konsumenten von Discountern auf kleine, regionale Fachgeschäfte umlenken über gesteigerte Lobbyarbeit	4	A	D	E	J		0	Rot	nein	Berlin
Nicht teure, sondern kreative Erzeugnisse aus recyceltem Material werden in Lifestyle-Magazinen gefeiert	4	D					0	Rot	nein	Berlin
Verbot von Fast Food etc.	4	A	F				0	Rot	nein	Berlin
Ökolandbau über Massenmedien bewerben und zum Konsens machen	4	D	I				0	Rot	nein	Berlin
Nahrung „mit Liebe“ anbauen, damit sich Geschmack entwickelt	4	G					0	Rot	nein	Berlin
Konsumenten die Vielfältigkeit von Lebensmitteln aufzeigen -> Gewohnheiten brechen auch mit regionalen, saisonalen Angeboten	4	A	J	K			0	Rot	nein	Berlin
Zusammenarbeit zwischen Produzent und Konsument	4	E	G				0	Rot	nein	Berlin
Friedenssicherung, sodass kein Hunger / Armut entsteht	4	F					0	Rot	nein	Berlin
Aufklärung/ Bildung zu Nachhaltigkeit	4	B					0	Rot	nein	Berlin
Von klein auf die Wichtigkeit einer ausgewogenen Ernährung anprangern	4	B					0	Rot	nein	Berlin
Aufklärung an Schulen und Arbeitsplatz (Bewusstsein schaffen) und Umsetzung (Kantinen, lange Essenspausen etc.)	4	A	B				0	Rot	nein	Berlin
Auf künstliche, geschmacksverstärkende Zusatzstoffe verzichten/ sie verbieten	4	F					0	Rot	nein	Berlin
Jedem Menschen Raum für Eigenanbau zu Verfügung stellen (oder zumindest günstiger anbieten)	4	G					0	Rot	nein	Berlin
Subventionen für Ökolandbau, konventionellen Anbau besteuern	4	F	I				0	Rot	nein	Berlin
Leichtere Verfügbarkeit -> so einfach wie der Einkauf konventioneller Lebensmittel	4	A					0	Gelb	nein	Münster
Fertig zusammengestellte Boxen, ähnlich wie „Fresh-Box“	4	A					0	Gelb	nein	Münster
Supermärkte, in denen die Ernährungsform „integriert“ ist -> z.B. direkt passende Mengen in den Verpackungen	4	A	S				0	Gelb	nein	Münster
Größere Produktpalette -> Vergleichbare Auswahl an Produkten wie konventionell Produziertes	4	A					0	Gelb	nein	Münster
Bei Portionsgrößen (g) bspw. ein „Bild“ wieviel das etwa in der Realität ist -> nicht immer wiegen müssen, sondern „Augenmaß“	4	B					0	Gelb	nein	Münster
Im Einkaufsmarkt auf alternative kreative Gestaltungs-/ Transport- und Verarbeitungsideen aufmerksam machen	4	A	C				0	Gelb	nein	Münster
Größere Transparenz zur Preiszusammensetzung/ -gestaltung von Bio-LM	4	C	H	I			0	Gelb	nein	Münster
Zuckersteuer	4	F					0	Gelb	nein	Münster
„Tante Emma Läden“ nur regionale, saisonale, verpackungsarme Produkte	4	A	J	K	S		0	Gelb	nein	Münster
Keine eingepackten Bio-Lebensmitteln mehr (Obst/ Gemüse)	4	I	S				0	Gelb	nein	Münster
Weniger Subventionen für Tierhaltungsbetriebe	4	F					0	Gelb	nein	Münster
Auch verarbeitete Lebensmittel in Bio-Qualität -> Lebensmittelwirtschaft	4	I					0	Gelb	nein	Münster
Grundsätzlich Obst und Gemüse mit Rezeptzetteln verkaufen	4	A	B				0	Gelb	nein	Münster
Food-Sharing	4	A	E				0	Gelb	nein	Münster
Wege der Bio-Lebensmittel erkennbar (wie, was, wo, woher…)	4	B	C	I			0	Gelb	nein	Münster
Mehr Aufklärung (v.a. was ist schlecht an konventionell)	4	B					0	Gelb	nein	Münster
Lebensmittel müssten günstiger angeboten werden	4	H					0	Gelb	nein	Münster
Emotionalere Denkweisen	4						0	Gelb	nein	Münster
Möglichkeiten Informationen	4	B					0	Gelb	nein	Münster
Übersichtliche Kennzeichnung	4	B	C				0	Gelb	nein	Münster
Bessere Kennzeichnung der Lebensmittel	4	B	C				0	Gelb	nein	Münster
Mehr Infos über Herkunft,… LM	4	B	C				0	Gelb	nein	Münster
Bessere Verbraucheraufklärung	4	B					0	Gelb	nein	Münster
Präsentheit	4	A	D				0	Gelb	nein	Münster
Aufklärung	4	B					0	Gelb	nein	Münster
Mehr Aufklärung	4	B					0	Gelb	nein	Münster
Weniger weiter verarbeitete Produkte	4	A					0	Gelb	nein	Münster
To-go Angebote außerhalb von Biomärkten	4	A	I				0	Gelb	nein	Münster
„einfachere“ Bio-Lebensmittel als dieses viele „Dinkel- Chia- Tofu Smoothie“-Zeug	4	A					0	Gelb	nein	Münster
Infos über die Lage von Hofläden	4	A	B				0	Gelb	nein	Münster
Mehr Transparenz -> Inhaltsstoffe, Herkunft, ...	4	C					0	Orange	nein	Münster
Wie kann man den Teufelskreis von großer Nachfrage und Massetierhaltung unterbrechen	4						0	Orange	nein	Münster
Pluspunktesystem	4						0	Orange	nein	Münster
Aufklärung & Unterstützung	4	B					0	Orange	nein	Münster
Gemeinschaftliches Handeln	4	E					0	Orange	nein	Münster
Umweltschutz	4						0	Orange	nein	Münster
Bilder von Massentierhaltung auf der Verpackung	4	B	C	D			0	Orange	nein	Münster
Wie macht man der Gesamtgesellschaft (gerader der Jugend) bewusst, dass der Mensch ohne die Natur Garnichts herstellen kann	4	B					0	Orange	nein	Münster
Sensibilisierendes Bildungsniveau	4	B					0	Orange	nein	Münster
Online Bio-Einkauf	4	A	I				0	Orange	nein	Münster
Informationen digitalisieren	4	B	D				0	Orange	nein	Münster
Technologie im Supermarkt	4						0	Orange	nein	Münster
Demographischen Wandel beachten	4	E					0	Orange	nein	Münster
Keine Informationsflut!	4	B	D				0	Orange	nein	Münster
Scannen für mehr Information	4	B					0	Orange	nein	Münster
Transparenz erhöhen	4	C					0	Orange	nein	Münster
Disparitäten vermeiden durch Aufklärung	4	B					0	Orange	nein	Münster
Nachkriegsgeneration „Wertschätzung der Lebensmittel“	4	E	O				0	Orange	nein	Münster
„Früher war mehr Lametta“ - Eigenversorgung/ keine Reste	4	G					0	Orange	nein	Münster
Natur oder Gewächshäuser? Natürliche/ künstliche Lebensmittel	4	G					0	Orange	nein	Münster
Hilfe zur Selbsthilfe	4	E					0	Orange	nein	Münster
Respektvoller Umgang mit Ressourcen	4	O					0	Orange	nein	Münster
Nachhaltiger Lieferservice	4	A					0	Blau	nein	Münster
Toleranz von anderen Ernährungsformen	4	E					0	Blau	nein	Münster
Weitergabe von Infos/ Werten	4	B					0	Blau	nein	Münster
Mehr Bio in den Alltag einführen	4	A					0	Blau	nein	Münster
Jeden beim Kochen einbeziehen	4	E	M				0	Blau	nein	Münster
Überfluss vermeiden	4	A					0	Blau	nein	Münster
Transparenz	4	C					0	Blau	nein	Münster
Verschiedene Produktionswege	4	G					0	Blau	nein	Münster
Wie können Fast-Food-Unternehmen nachhaltiger werden?	4	A					0	Blau	nein	Münster
Kompromisse im Mehrgenerationenhaushalt	4	E					0	Blau	nein	Münster
Austausch von Wissen/ Erfahrungen/ Konsumgüter	4	B	E				0	Grün	nein	Münster
Aufklärung / Umsetzung von Infos & Weitergabe	4	B					0	Grün	nein	Münster
Wie kann man das Bewusstsein für die Ressourcenknappheit (Endlichkeit der Erde) schaffen?	4	O					0	Grün	nein	Münster
App zum Punkte sammeln für den richtigen Einkauf (bio)	4	D	I				0	Grün	nein	Münster
Zusammen bio kochen und essen	4	E	I	M	N		0	Grün	nein	Münster
Gemeinsame Durchsetzung (Familie)	4	E					0	Grün	nein	Münster
Aufklärungsaktionen z.B. in Zeitungen -> regelmäßig	4	B	D				0	Grün	nein	Münster
Wie kann man Vorurteile in der Gesellschaft durch Aufklärung beseitigen?	4	B	E				0	Grün	nein	Münster
Preis-Leistungs-Verhältnis	4	H					0	Grün	nein	Münster
Unterstützung im häuslichen Umfeld (z.B. Partner/ Beziehung)	4	E					0	Grün	nein	Münster
Wie kann man nachhaltige Verpackungsmöglichkeiten etablieren?	4	S					0	Grün	nein	Münster
Tauschen und Teilen von nachhaltigen Lebensmitteln	4	A	E				0	Grün	nein	Münster
Anlaufstellen für Hilfesuchende	4	E					0	Grün	nein	Münster
Anlaufstelle/ Homepage/ Telefonnummer	4	B	D	E			0	Grün	nein	Münster
Im Studium lernen nachhaltig zu Handeln	4	B					0	Grün	nein	Münster
Auflagen für bestimmen Anbau (Limitationen)	4	F	G				0	Rot	nein	Münster
Freie Auswahl an Lebensmitteln	4	A					0	Rot	nein	Münster
Gezielte Auswahl im Supermarkt	4	A					0	Rot	nein	Münster
Keine Gentechnik	4	F	G				0	Rot	nein	Münster
Ausgewogene Ernährung! -> somit effektive Abnehmpille gar nicht nötig!	4						0	Rot	nein	Münster
Keine Großmärkte, Viele Bio-Läden	4	A	I				0	Rot	nein	Münster
Förderungen von verschiedenen Vereinen	4	E					0	Rot	nein	Münster
Biologische Produktvielfalt erweitern	4	A	I				0	Rot	nein	Münster
Große Auswahl an Produkten	4	A					0	Rot	nein	Münster
Bilder vom guten Öko-Landbau abbilden	4	B	D	I			0	Rot	nein	Münster
Erreichbarkeit/ Verfügbarkeit verbessern	4	A					0	Rot	nein	Münster
Überall Bio-Angebote	4	A	I				0	Rot	nein	Münster
Infektionsschutz erhöhen	4	F					0	Rot	nein	Münster
Nicht industriell gefertigte LM -> unverarbeitet z.B.	4	A					0	Rot	nein	Münster
Kein Einsatz mehr von synthetischen Düngemitteln	4	G					0	Rot	nein	Münster
Bio-Angebote an jeder Ecke	4	A	I				0	Rot	nein	Münster
Schärfere Produktions- & Qualitätskontrollen	4	F					0	Rot	nein	Münster
Böden schonend behandeln (wenig Dünger)	4	G					0	Rot	nein	Münster
Weiterbildung	4	B					0	Rot	nein	Münster
Vertrauen zu den Produzenten	4	E	G				0	Rot	nein	Münster
Gleichheit von Menschen/ Gesellschaften	4	E					0	Rot	nein	Münster
Einheitliche/ Standardisierte Kontrolle	4	F					0	Rot	nein	Münster
Gute Kommunikation weltweit	4	B					0	Rot	nein	Münster
Biomärkte fördern (subventionieren)	4	A	F	I			0	Rot	nein	Münster
Unterstützung bei Selbstanbau z.B. vom Staat -> Landflächen zur Verfügung stellen	4	F	G				0	Rot	nein	Münster
Mehr Unterstützung vom Staat	4	F					0	Rot	nein	Münster
Keine Verwendung von Pestiziden/ Antibiotika	4	G					0	Rot	nein	Münster
Keine Hormone bei Tierhaltung	4	G					0	Rot	nein	Münster
Kurze Produktions- und Transportwege	4	G					0	Rot	nein	Münster
Pillen, die zur Ergänzung der Ernährung dienen	4						0	Rot	nein	Münster
Freie Entscheidungen ermöglichen/ zulassen	4	E					0	Rot	nein	Münster
Verbreitung von Bio-Märkten und co.	4	A	I				0	Rot	nein	Münster
Menschen in ihrem Wissen und ihren Werten bestätigen	4	B					0	Rot	nein	Münster
Ökobauern unterstützen	4	G	I				0	Rot	nein	Münster
Herkunft auf die Lebensmittel drucken	4	C					0	Rot	nein	Münster
Kinder erreichen Eltern und Großeltern	4	B	E				0	Gelb	nein	Freiburg
In Kindergärten: für Natur begeistern	4	B					0	Gelb	nein	Freiburg
In Schulunterricht: Lebensgrundlagen	4	B					0	Gelb	nein	Freiburg
Erlebnisbauernhof	4	B	G				0	Gelb	nein	Freiburg
Produktionsteile in die Stadt bringen z.B. Kulturacker	4	G	R				0	Gelb	nein	Freiburg
Stärkung von Landwirten von allen gesellschaftlichen Bereichen (Staat, Konsument, Wirtschaft) für biologische Produktion	4	E	F	G	I		0	Gelb	nein	Freiburg
Wertewandel: Landwirtschaft für das Mittel zum Leben verstehen anstatt wie Industriesektor	4	G					0	Gelb	nein	Freiburg
Kommunikation und Verständnis	4	E					0	Gelb	nein	Freiburg
Prekäre Lebenssituationen verringern	4	F					0	Gelb	nein	Freiburg
Hilfestellungen bei der Komplexität von Konsumentscheidungen aus unabhängigen Quellen (!) entwickeln, präsenter/ attraktiver machen	4	B					0	Gelb	nein	Freiburg
Möglichkeit entwickeln den CO2-Abdruck/ sozialen Impact von Produkten zu beziffern und diesen Wert dem Produkt zuordnen -> Transparenz	4	B	C				0	Gelb	nein	Freiburg
Ein Mix aus Steuerungselementen anwenden: Von Labeling über klare Vorgaben von Entscheidungsträger über partizipiere Landwirtschaft -> schafft Infrastruktur für ein erfolgreiches Umsetzen des Wissens/ Werte oder ggf. sogar ohne entsprechendes Wissen/ Bewusstsein	4	E	F	G			0	Gelb	nein	Freiburg
Verschiedene Gruppen ansprechen! Verbände, Gewerkschaften, Firmen und auf deren Bedürfnisse eingehen! (Ernst nehmen!!)	4	E					0	Gelb	nein	Freiburg
Neue Medien nutzen	4	D					0	Gelb	nein	Freiburg
Bildung: positive Erfahrungen schaffen, um Interesse und Wertschätzung zu wecken. Z.B. Projekte in Schulen, außerschulischen Lernorten	4	B	O				0	Gelb	nein	Freiburg
Kombination aus Kultur, Technik, nachhaltiger Lebensmittelproduktion	4	P					0	Gelb	nein	Freiburg
Mehr Transparenz über Inhaltstoffe von Waren – verständlichere Deklarierung	4	C					0	Gelb	nein	Freiburg
Finanzielle Sicherheit für Geringverdiener schaffen -> „Preis entscheidet“	4	F	H				0	Gelb	nein	Freiburg
Menschen mehr in Produktions-, Recycling- und Entsorgungskette einbinden - > Bezug zur Nahrung, Verantwortung für Handlung	4	E					0	Gelb	nein	Freiburg
Verbindliche Abnahme von Ware (z.B. Biokiste) (Weniger Müll, weniger Überangebot, direkt „gute“ Ware, Entscheidung wird nicht jedes Mal neu getroffen	4	A	I				0	Gelb	nein	Freiburg
Noch mehr „Kontaktflächen“ für Bewusstseinsbildung schaffen	4	O					0	Gelb	nein	Freiburg
Initiativen, die es bereits gibt vernetzen (für Austausch, Ideen, Kommunikation, Synergien)	4	E					0	Gelb	nein	Freiburg
Öffentliche/ halböffentliche Nahrungsbereitsteller stärker in Verantwortung nehmen, z.B. Mensen, Kantinen, etc.	4	A					0	Gelb	nein	Freiburg
Macht der Werbung -> für positive/ nachhaltige Produkte nutzen	4	D					0	Gelb	nein	Freiburg
Gesetzgebung!	4	F					0	Gelb	nein	Freiburg
Entsprechende Gestaltung von Subventionen (Förderung von kleinbäuerlichem Bio- Anbau mit regionaler Vermarktung)	4	F	G	I	J		0	Gelb	nein	Freiburg
Thematisch viel stärker in die Schulen bringen, vor allem über „praktische“ Erfahrungen/ Erlebnisse	4	B					0	Gelb	nein	Freiburg
Kindern den „Wert“ von Natur nahebringen -> schützenswert	4	B					0	Gelb	nein	Freiburg
Weniger Angebot	4	A					0	Gelb	nein	Freiburg
Natürliche N-Reserven nutzbar machen, N- Düngereinsatz reduzieren (Methan, Lachgas)	4	G					0	Gelb	nein	Freiburg
Erholungsparks, Natur mit Gruppenführungsangeboten	4	B					0	Gelb	nein	Freiburg
Bodenschutz!!! Auch von Bodenleben!	4	G					0	Gelb	nein	Freiburg
Verpflichtung aller Landwirte zur Pflanzung von 5-10 % Bäume pro Hektar	4	G					0	Gelb	nein	Freiburg
Staatlich finanzielle Wertschätzung für Nachbarschaftshilfe (Verdienstausfall)	4	F	E				0	Gelb	nein	Freiburg
Mehr Anerkennung und Lohn für soziale Berufe und Landwirtschaft	4	F	E				0	Gelb	nein	Freiburg
Obergrenze Hektar für Landwirtschaftliche Betriebe (Überproduktion und Preisverfall)	4	F	G				0	Gelb	nein	Freiburg
Ende der Flächensubvention (Profit nur für Großfarmen)	4	F	G				0	Gelb	nein	Freiburg
Kooperation beider Seiten für Lebensmittelanbau und Naturschutz	4	E	G				0	Gelb	nein	Freiburg
Mehr staatliche Gelder für Pflanzenschutzmittel-unabhängige Forschung	4	F					0	Orange	nein	Freiburg
Ursachen beheben, statt Schaderreger bekämpfen!	4	G					0	Orange	nein	Freiburg
Förderung Buchen-Mischwälder für stabile, saubere Trinkwasserbestände	4	F					0	Orange	nein	Freiburg
Nachhaltigkeitsbegriff definieren und durch Kriterien messbar machen (Greenwashing vermeiden)	4	B	F				0	Orange	nein	Freiburg
Kleine Veränderungen wertschätzen!	4	O					0	Orange	nein	Freiburg
Vorträge/ Workshops „Was sind Grundlagen, die wir wirklich brauchen?“	4	B					0	Orange	nein	Freiburg
Bessere pädagogische Ausbildung für Lehrer (gutes Miteinander der Schüler)	4	B	E				0	Orange	nein	Freiburg
Führerschein (PKW) – Verlust bei Nichtteilnahme regelmäßiger Klimavorträge (alle 3-4 Jahre)	4	F	B				0	Orange	nein	Freiburg
Gemeinschaftliches Kochen organisieren, bei dem der Wert guter Lebensmittel geschätzt wird	4	E	M				0	Orange	nein	Freiburg
Wertschätzung	4	O					0	Orange	nein	Freiburg
Faire Gesetzeslage: z.B. „Hühnerkuscheln“ verboten. Kleinbäuerlich/ Bio-Strukturen fördern	4	F	G	I			0	Orange	nein	Freiburg
Verpackungsfreie Läden mit regionalen und Bio-Produkten	4	A	I	J	S		0	Orange	nein	Freiburg
Meditation in Schule und Beruf	4	O					0	Orange	nein	Freiburg
Schon getestete Strategien evaluieren aus Vergangenheit lernen und sich weiterentwickeln	4	B					0	Orange	nein	Freiburg
Die Gesetzmäßigkeit der Natur ernst nehmen	4	O					0	Orange	nein	Freiburg
Naturgewalt als Energieträger nutzen	4						0	Orange	nein	Freiburg
Sorgsam in Gemeinschaft aus Lebenserfahrung gesunde Lebenswege gestalten	4	B	E				0	Orange	nein	Freiburg
Wir entscheiden wo und wie es in die Zukunft geht!	4	E					0	Orange	nein	Freiburg
Gerechtere Verteilung von Ressourcen durch Beschränkung und Verfügbarmachen	4	A	E				0	Orange	nein	Freiburg
Angepasste Nutzung der „sozialen Medien“	4	D					0	Orange	nein	Freiburg
Viele Tropfen ergeben einen Ozean -> gemeinsam sind wir stark	4	E					0	Orange	nein	Freiburg
Gemeinwohlbilanz	4	E					0	Orange	nein	Freiburg
Information über soziale Netzwerke, Apps, andere Medien	4	B	D				0	Orange	nein	Freiburg
Solidarische Landwirtschaft	4	E	G				0	Orange	nein	Freiburg
Grenzen wahrnehmen -> Veränderungen im Klima	4	O					0	Orange	nein	Freiburg
Back to the roots -> Subsistenz	4						0	Orange	nein	Freiburg
Entschleunigung der Gesellschaft -> Mehr Achtsamkeit für das Umfeld	4	O	Q				0	Orange	nein	Freiburg
Gemeinsames Ernten mit „Arbeit“ dem Erzeuger Dienstleistung <-> Erzeugnis	4	E	G				0	Blau	nein	Freiburg
Gesundes Fast Food	4	A					0	Blau	nein	Freiburg
Bio-Fast Food Läden	4	A	I				0	Blau	nein	Freiburg
Kräuter-/ Beeren-/ Waldspaziergänge: „Was bietet der Wald Essbares?“	4	B	E				0	Blau	nein	Freiburg
Austausch über das Essen/ Kochen (Werte, Bildung)	4	B	E	M	N		0	Blau	nein	Freiburg
Regionale Produktion unterstützen: „Frisches“ vom Markt holen	4	A	G	J			0	Blau	nein	Freiburg
Erfahrbar machen von Landwirtschaft -> Wertschätzung	4	G	O				0	Blau	nein	Freiburg
Naturschutztreffen bei Picknick und Lagerfeuer im Grünen (Gleichgesinnte treffen)	4	E					0	Blau	nein	Freiburg
Alte Rezepturen verwenden -> Landküche	4	M					0	Blau	nein	Freiburg
Breite Werbung für nachhaltigen Konsum	4	D					0	Grün	nein	Freiburg
Ansprechen verschiedener Zielgruppen durch unterschiedliche Methoden und Themen	4	B	D				0	Grün	nein	Freiburg
Umbenennung von Unkraut -> Beikräuter	4						0	Grün	nein	Freiburg
Empathie für Landwirte schaffen	4	E	G	O			0	Grün	nein	Freiburg
Ressourcen schonen für Art und Weise der Lebensmittelherstellung	4	G					0	Grün	nein	Freiburg
Austausch von Praxiserfahrung zwischen Erzeuger/ Konsument <-> Konsument/ Erzeuger	4	B	E	G			0	Grün	nein	Freiburg
Bürger zu mehr Offenheit bezüglich regionaler Landwirtschaft bewegen	4	E	G	J			0	Grün	nein	Freiburg
Nachbarschaftskooperationen Raum und Struktur geben	4	E					0	Grün	nein	Freiburg
Vielfältiges Angebot an Lebensmitteln	4	A					0	Rot	nein	Freiburg
Wissenstransfer von Information zu Inhalt und Produktion der Lebensmittel in allen Gesellschaftsschichten	4	B	E				0	Rot	nein	Freiburg
Subvention von Kleinbauern	4	F	G				0	Rot	nein	Freiburg
Saatgutvielfalt erhalten und erlauben/ fördern	4	F	G				0	Rot	nein	Freiburg
Vermarktung von überproduzierten Produkten innerhalb eines Radius von 500 km	4	A					0	Rot	nein	Freiburg
Das Thema „Ernährung“ in Medien stärker verbreiten	4	D					0	Rot	nein	Freiburg
Verbot von Landgrabbing -> Land für Subsistenzlandwirtschaft	4	F					0	Rot	nein	Freiburg
Kennzeichnungspflicht	4	F	C				0	Rot	nein	Freiburg
Preisstabilität/ -sicherheit schaffen	4	H					0	Rot	nein	Freiburg
Zertifizierung von Bioprodukten und Kontrolle, Verbot von Pseudo-Zertifizierung	4	F	I				0	Rot	nein	Freiburg
Bio-Subventionen	4	F	I				0	Rot	nein	Freiburg
Zusammensetzung einzelner Zutaten und deren Wirkung verstehen lernen für eine ausgewogene Ernährung z.B. Ayurveda	4	B					0	Rot	nein	Freiburg
Pflanzenschutzmittel ganzheitlich untersuchen	4	B					0	Rot	nein	Freiburg
Bürokratie reduzieren	4	F					0	Rot	nein	Freiburg
Transparente und faktentreue Berichterstattung mit wissenschaftlicher Grundlage	4	B	C	D			0	Rot	nein	Freiburg
Besseren Zugang zu Land für Kleinbauern	4	G					0	Rot	nein	Freiburg

## Sheet: Daten_Dortmund
Idee	Deduktive Codierung	Induktive Codierung					Punkte	Farbe	Favoritverwendung	Ort
Menschen in Andersartigkeit/ Individualität beachten und begegnen	0						2	Gelb	ja	Dortmund
Individualverkehr (Autos) -> Abgase in den Städten reduzieren	0						0	Gelb	nein	Dortmund
Wissen – Aktivität –> Handeln	0						0	Gelb	nein	Dortmund
Nicht: „Du böse, ich gut“	0						0	Gelb	nein	Dortmund
Mit einfachen Dingen beginnen: „Wer duscht gern mit toten Tieren?“	0						0	Gelb	nein	Dortmund
Nahrung auf psychischer Ebene -> genährt sein	0						1	Orange	nein	Dortmund
Entfremdung angehen -> Kontakt zur Natur	0						1	Orange	nein	Dortmund
Lernen, was heute überhaupt „einfach“ ist	0						0	Orange	nein	Dortmund
Andere anregen durch eine kleine Pflanze	0						0	Orange	nein	Dortmund
Vertrauen in die Kraft von natürlichen Prozessen	0						0	Orange	nein	Dortmund
Sozialkompetenzen vorrangig vor dogmatischen Werten	0						1	Blau	nein	Dortmund
Inhalt: keine Produkte, sondern Haltung! Jemand begleitet Themenabende	0						0	Blau	nein	Dortmund
Vertrauen schaffen in die Zukunft, Anderen zuhören, ihre Ängste verstehen und sich mit ihnen auseinandersetzen.	0						2	Grün	ja	Dortmund
Inklusion fördern auf allen Ebenen: soziale Schicht, Gesundheit, Alter, Kultur, Nationalität, Geschlecht; Ghettoisierung entgegenwirken	0						0	Rot	nein	Dortmund
Arbeitseffektivität messen und nicht Anwesenheit; Gerechtes Bezugssystem (Bsp. überhöhte Pensionen & Gehälter)	0						0	Rot	nein	Dortmund
Ernährung selbst erfahren – wo kommen Äpfel her, woraus besteht mein Frühstücksaufschnitt?	1	B					3	Gelb	ja	Dortmund
Selbsterfahrung in der Lebensmittelzubereitung	1	B	M				1	Gelb	nein	Dortmund
Gelassenheit schaffen: Es darf kein „Stress“ sein, sich nachhaltig zu ernähren, keiner sollte sich unter Druck gesetzt fühlen -> Dieser Wert/ Wissen darf nicht aufgezwängt werden/ von Innen kommen -> gibt es überhaupt richtig /falsch	1	Q					1	Orange	nein	Dortmund
Essen als bewusste Auszeit	1	O	Q				1	Blau	nein	Dortmund
Nicht im Übermaß kaufen, dann kann man sich auch gesunde Sachen kaufen	1						0	Rot	nein	Dortmund
Kleinigkeiten umsetzen -> am Anfang nicht den Anspruch haben, alles richtig machen zu müssen	2						4	Gelb	ja	Dortmund
Austausch	2	B					1	Gelb	nein	Dortmund
Kontakt mit Bauern pflegen -> regional oder auch international	2	B	J				1	Gelb	nein	Dortmund
Verantwortung als Konsument erkennen	2	O					0	Gelb	nein	Dortmund
Ich: Kritisch „Handeln“ hinterfragen, reflektieren, neu Handeln; Andere: Reden, vorleben, austauschen	2	O					0	Gelb	nein	Dortmund
Bewusste Erfahrungen in anderen Kulturen bspw. Im Urlaub sammeln	2	O	P				0	Gelb	nein	Dortmund
Verknüpfung Einkaufen (z.B. Bio-Produkte) mit z.B. Radtour	2	L	I				0	Gelb	nein	Dortmund
Kreative Ernährung	2						0	Gelb	nein	Dortmund
Erkennen, dass auch Kleinigkeiten etwas verändern können (auch ich kann etwas bewegen, auch wenn ich nur einer von 8 Milliarden bin)	2	O					2	Orange	ja	Dortmund
Gleichgesinnte finden, die zusammen etwas bewegen können	2	E					2	Orange	nein	Dortmund
Jeder könnte für sich eine Vision entwickeln, wie er sich ernähren möchte und möglichst wenig „Schaden“ anrichtet.	2	O					1	Orange	nein	Dortmund
Bewusstsein schaffen: Was hat mein Verhalten für Auswirkungen auf die anderen Menschen der Welt im Hinblick darauf, dass wir uns alle die Welt teilen?	2	O					0	Orange	nein	Dortmund
Ressourcen achtsam nutzen -> durch direkten Kontakt zu ihrer Erzeugung	2	O	B				0	Orange	nein	Dortmund
Sich selbst daran erinnern, welche Unterschiede bestehen. Handeln: was ist daran gut, was schlecht?	2	O					0	Orange	nein	Dortmund
Der Einzelne ist auch Teil der Gemeinschaft	2	E					0	Orange	nein	Dortmund
Betroffenheit löst Handlungsbedarf aus -> Beschäftigung mit Themen anregen	2	O					3	Blau	ja	Dortmund
Schließen der Lücke zwischen Zeit- und Geldressourcen	2	Q	H				4	Blau	ja	Dortmund
Lokale Auseinandersetzung mit Nahrungsmittelproduktion	2	O					1	Blau	nein	Dortmund
Andere Menschen inspirieren durch neue Kochideen, regionale/ saisonales Essen besser umsetzen	2	J	K	M			1	Blau	nein	Dortmund
Kulturelle Unterschiede bzgl. Ernährung kennenlernen, ausprobieren, erfragen (Kochbuch der Nationen)	2	B	P				3	Grün	ja	Dortmund
Fragen stellen dürfen -> konkrete Antworten finden. Nicht um die „Schattenseite“ zu definieren sondern um das Gute zu finden; dann entscheiden	2	B					3	Grün	ja	Dortmund
Zeit zum Hinterfragen von Gewohnheiten nehmen	2	O	Q				2	Grün	nein	Dortmund
Private Kochtreffen mit Bekannten/ Freunden/ Fremden	2	E	M				1	Grün	nein	Dortmund
Sich mit Gleichgesinnten verbinden -> Austausch, Unterstützung, Stärkung	2	E					1	Grün	nein	Dortmund
Strukturen suchen, wo ich leben kann woran ich glaube. Raus aus der Stad, aus dem Land?	2						0	Grün	nein	Dortmund
„Früchte der Arbeit ernten“, Anstrengung lohnenswert sehen	2	O					0	Grün	nein	Dortmund
Beim Kochen Erfahrung sammeln und dazu lernen (leicht und spielerisch)	2	B	M				0	Grün	nein	Dortmund
Veranstaltungen (Messen, Feste…) nutzen: mit Freunden, Kindern, Nachbarn... um Lebensweise kennenlernen als unverbindliche Info-Quelle	2	B					0	Grün	nein	Dortmund
Sich bewusstmachen, wie viel ich wegwerfe	2	O					0	Grün	nein	Dortmund
Neue Erfahrungen machen: Settingwechsel durch: Kochkurse, neue Rezepte, andere Menschen	2	B	M	O			0	Grün	nein	Dortmund
Bereit sein, sich auf Neues/ Anderes einzulassen	2	O					0	Grün	nein	Dortmund
Trends hinterfragen, nicht hinterherlaufen	2	B	O				1	Rot	nein	Dortmund
Finanzielle Unabhängigkeit -> freie Zeit in Engagement stecken	2						1	Rot	nein	Dortmund
Als Verbraucher sich mit anderen Verbrauchern austauschen	2	B	E				0	Rot	nein	Dortmund
Nicht hinnehmen, was ich sehe und mir nicht gefällt! Mutig sein, zu handeln, entgegenwirken	2						0	Rot	nein	Dortmund
Kritische Konsumentenhaltung durchschaut Marketingstrategie der „heilen Welt“-Suggestion	2						0	Rot	nein	Dortmund
Verfügbarkeit schaffen -> im öffentlichen Raum ist es oft unmöglich, nachhaltige Lebensmittel zu bekommen	3	A					1	Gelb	nein	Dortmund
Transparenz schaffen: jeder will seine Produkte verkaufen und stellt sie toll dar -> objektive Bewertungen zu allen Lebensmitteln in verschiedenen Kriterien (Fair Trade, regional, ökologisch…)	3	C	J				0	Gelb	nein	Dortmund
Preise für Lebensmittel müssen die Vollkosten abbilden	3	H					5	Orange	ja	Dortmund
Gemeinschaft: Wenn viele an einem Ziel arbeiten fällt es leichter -> Viele gärtnern zusammen, einer holt Lebensmittel für viele, anstatt dass jeder selbst losfahren muss.	3	E	L				1	Orange	nein	Dortmund
„Ökopunkte“ auf den Produkten, je nach ökologischer Qualität	3	D					0	Orange	nein	Dortmund
Förderung nachhaltiger Gastronomie	3	A					3	Blau	ja	Dortmund
Obstkörbe für die Mitarbeiter durch Firma bereitstellen	3	A					1	Blau	nein	Dortmund
Gesundes, nachhaltiges „Fastfood“	3	A					1	Blau	nein	Dortmund
Gemeinsames Kochen in z.B. Hostels	3	E	M				1	Blau	nein	Dortmund
Apps oder Internetseite über Saisonprodukte	3	B	K				1	Blau	nein	Dortmund
Essbare Bäume in Parks	3	R					1	Blau	nein	Dortmund
Kantine umstrukturieren, Essen bestellen: frische nachhaltige Caterer statt der Stamm-Pizzeria, Gemeinsames Essen organisieren: jeder bringt 1x die Woche etwas Frisches mit	3	A					1	Blau	nein	Dortmund
Fertig gepackte Selbstversorgungsrucksäcke anbieten (als Supermarkt in Ausflugsregionen)	3	A	J				0	Blau	nein	Dortmund
Durch Info-Zettel an den Produkten Verbraucher über den Produktionsvorgang informieren	3	B	C				1	Grün	nein	Dortmund
Marktstand eines regionalen Anbieters im Wohnviertel	3	A	J	R			3	Rot	ja	Dortmund
Wochenmärkte fördern und umgestalten, z.B. Feierabendmärkte	3	A					2	Rot	ja	Dortmund
Steuern auf „ungesunde“, nicht ökologische Nahrungsmittel	3	F					4	Rot	ja	Dortmund
Positive Aspekte von Werbestrategien für nachhaltige Produkte nutzen	3	D					1	Rot	nein	Dortmund
Ladenkonzept: Bioprodukte direkt neben konventionellen Produkten stellen = direkter Vergleich möglich	3	A	I				1	Rot	nein	Dortmund
Niedrigere Preise für nachhaltige Produkte durch Fördermittel	3	F	H				2	Rot	nein	Dortmund
Umfangreiche Informationen zu ökologischen und ökonomischen Qualitäten der jeweiligen Produkte	3	B	C				0	Rot	nein	Dortmund
Höhere Produktpreise für konventionelle Produkte	3	H					0	Rot	nein	Dortmund
Ehrliche Werbung mit konstruktiven Argumenten zur Umweltqualität der Produkte	3	D					0	Rot	nein	Dortmund
Solidarwirtschaft fördern, so dass keiner gezwungen ist bei anständigem Lohn, bei Discountern/ Konzernen zu kaufen (die nicht solidarisch entlohnen)	4	E	F				2	Gelb	ja	Dortmund
Wirtschaft stärker in Verantwortung ziehen (Anreize, Sanktionen)	4	F					2	Gelb	ja	Dortmund
Kennzeichnungspflichten (lokal, bio, vegan, saisonal)	4	C	F	I	J	K	3	Gelb	ja	Dortmund
„Früh“- Aufklärung -> in Bildungssystemen (Kitas, Schulen, ...)	4	B					4	Gelb	ja	Dortmund
Peer-Groups bilden -> gemeinsames Einkaufen & Kochen	4	E	L	M			3	Gelb	ja	Dortmund
Anreize schaffen z.B. Nachhaltigkeitspunkte	4						1	Gelb	nein	Dortmund
Zu landwirtschaftlichen Erfahrungen einladen	4	B	G				1	Gelb	nein	Dortmund
„Berührungspunkte“ schaffen	4						1	Gelb	nein	Dortmund
Zu nachhaltigen Produkten spannende Geschichten erzählen	4	B	D				1	Gelb	nein	Dortmund
Gruppenkochen	4	E	M				1	Gelb	nein	Dortmund
Selbstbestimmung/ Selbstorganisation fördern	4						1	Gelb	nein	Dortmund
Gemeinschaftsgärten	4	E	G				1	Gelb	nein	Dortmund
Best Practice veröffentlichen	4	B					0	Gelb	nein	Dortmund
Info- App	4	B	D				0	Gelb	nein	Dortmund
„Stolperpunkte“ -> Erinnerer, sich bewusst zu werden	4						0	Gelb	nein	Dortmund
Finanzielle Möglichkeiten: würden die Konsequenzen aus konventioneller Landwirtschat in den Preis innbegriffen, wäre Bio nicht teurer. Essen muss den Menschen dieser Preis wert sein -> lieber Verzicht auf andere Dinge	4	H	I	O			0	Gelb	nein	Dortmund
Betriebskantine -> Workshop	4	B					0	Gelb	nein	Dortmund
Attraktive Alternativen	4	A					0	Gelb	nein	Dortmund
Konsequenzen des Konsums aufzeigen -> was wird passieren, wenn ich so weitermache? Ökologisch, ökonomisch, sozial	4	B	C				0	Gelb	nein	Dortmund
Säkulare Gemeindehäuser aufbauen -> leere Kirchen nutzen	4						0	Gelb	nein	Dortmund
Wege zu den Produkten	4	C					0	Gelb	nein	Dortmund
Hühnerhaltung in den Innenhöfen	4	G					0	Gelb	nein	Dortmund
Hinterhofgärten statt Rasenfläche	4	G					0	Gelb	nein	Dortmund
Wissen leicht und klar zugänglich machen	4	B					0	Gelb	nein	Dortmund
Infoveranstaltungen in Bioländern	4	B	I				0	Gelb	nein	Dortmund
Wirtschaftsförderung für Kleinst-/ kleine Unternehmen statt für mittlere/ große Konzerne, so dass Kunden die Auswahl haben	4	A	F				0	Gelb	nein	Dortmund
Konfrontation	4						0	Gelb	nein	Dortmund
Bienenhaltung am Balkon fördern	4	G					0	Gelb	nein	Dortmund
Hilfestellung geben: Wo kann ich anfangen?	4	B	E				0	Gelb	nein	Dortmund
Interessante Spitzenprodukte, die presserelevant sind	4	D					0	Gelb	nein	Dortmund
Food Sharing	4	A	E				0	Gelb	nein	Dortmund
Konfrontation; jeder muss früh informiert werden	4	B					0	Gelb	nein	Dortmund
Balkonbepflanzung fördern mittels Workshops	4						0	Gelb	nein	Dortmund
Netzwerke mit unterschiedlichen Akteuren zum Thema aufbauen, in denen es keine zentrale Moderation/ Hierarchie gibt	4	B	E				0	Gelb	nein	Dortmund
Gelder erhöhen um Projekt nach dem Bottom-up Prinzip zu fördern -> stärkere Lobby schaffen	4	F					0	Gelb	nein	Dortmund
Schulgärten -> essbare Alleen	4	A	B				0	Gelb	nein	Dortmund
„Wünschenswertes Handeln“ spielerisch erlebbar machen (als Theaterstück aufführen, Videoclip via YouTube streamen)	4	B	D				0	Gelb	nein	Dortmund
Urbans Gärtnern auf Freifläche erlauben	4	F	G	R			0	Gelb	nein	Dortmund
Durch Informationen zum Handeln anregen	4	B					0	Gelb	nein	Dortmund
Akzeptanz schaffen -> damit man nicht als „Gutmensch“ bezeichnet wird (abwertend)	4						0	Gelb	nein	Dortmund
Anregungen, Motivation und keine Belehrung mehr	4	B	D				0	Gelb	nein	Dortmund
Angebote zentral bekannt machen (clearing house); Neue Angebote gemeinsam entwickeln	4	A	D				0	Gelb	nein	Dortmund
Niedrigschwellige Angebote	4						0	Gelb	nein	Dortmund
Sinnliches Erleben kultivieren	4	O	P				0	Gelb	nein	Dortmund
Orte, wo Mensch die Produkte bekommen kann, bekannter machen	4	A	D				0	Gelb	nein	Dortmund
Gemeinschaftsküchen	4	E	K				0	Gelb	nein	Dortmund
Gemeinsame Kochabende mit interdisziplinärem Teilnehmerkreis	4	E	K				0	Gelb	nein	Dortmund
Niedrigschwellige Aufklärung (z.B. Anzeigen/ Plakate)	4	B	D				0	Gelb	nein	Dortmund
Flashmobs	4	D	E				0	Gelb	nein	Dortmund
Verbot/ Besteuerung nicht-nachhaltiger Produkte	4	F					0	Gelb	nein	Dortmund
Klare Angaben auf den Produkten, welche Zutaten woher kommen	4	C					2	Orange	ja	Dortmund
Schule : Fach Nachhaltigkeit	4	B					3	Orange	ja	Dortmund
Umweltbildung: Stadtteilzentren aufbauen – Infrastruktur zu Verfügung stellen	4	B	R				2	Orange	ja	Dortmund
Man muss Konsequenzen erfahrbar machen	4						3	Orange	ja	Dortmund
Wertschätzung für Lebensmittel stärken	4	B	D	O			3	Orange	ja	Dortmund
Umweltbildung als Schulfach	4	B					3	Orange	ja	Dortmund
Frühe Aufklärung	4	B					1	Orange	nein	Dortmund
Gemeinsam eine Basis schaffen, die aufklärt	4	B	E				1	Orange	nein	Dortmund
Transparenz schaffen (Was läuft gut? Was läuft schlecht?), so dass man auch entsprechend achten/ handeln kann	4	C					1	Orange	nein	Dortmund
Jeder wird angeleitet (in Schule, Kita, Uni, Unternehmen...), eine solche Vision zu entwickeln (Vorteile: es wird sichtbar wer wofür steht und man kann sich zusammenschließen)	4	B					2	Orange	nein	Dortmund
Bildung -> Praxis (spüren, schnibbeln, riechen, kochen, gemeinsam essen und reden, einkaufen)	4	B	E	M	N		2	Orange	nein	Dortmund
Die Kraft der Gemeinschaft nutzbar machen	4	E					1	Orange	nein	Dortmund
Kultur des Bewusstseins der Reflektion fördern (Hinterfragen, Diskutieren, Lösen/ Handeln)	4	O	P				0	Orange	nein	Dortmund
Ein einzelner Vorschlag an der richtigen Stelle kann schon Großes bewegen	4						0	Orange	nein	Dortmund
Schlachthofbesichtigung	4	B					0	Orange	nein	Dortmund
Ernährungsfragen verbrauchen Zeit, die unser Wirtschaftssystem zu einer knappen Ressource macht -> Entfremdung	4	Q					0	Orange	nein	Dortmund
Soziale Marktwirtschaft -> mehr staatlicher Eingriff	4	F					0	Orange	nein	Dortmund
Global denken: Bio-Kartoffeln aus Ägypten in Deutschland unnütz -> allen Menschen ein nachhaltiges Leben ermöglichen	4	A	I				0	Orange	nein	Dortmund
Verflechtungen, Abhängigkeiten darstellen (z.B. systems dynamics)	4	B	C				0	Orange	nein	Dortmund
Bewusstsein für die Einfachheit des Wohlfühlens schaffen	4	O					0	Orange	nein	Dortmund
Die Grenzen der Technik aufzeigen (Natur muss gepflegt, nicht beherrscht werden)	4	B					0	Orange	nein	Dortmund
Bewusstsein schaffen, dass die Natur regional und saisonal das Wichtigste bereitstellt	4	B	J	K	O		0	Orange	nein	Dortmund
Projekt: Schreib/ Zeig auf, was du isst: „Zeig, wer du bist“	4						0	Orange	nein	Dortmund
Wissensvermittlungen von biologischen Zusammenhängen/ Kreisläufen	4	B					0	Orange	nein	Dortmund
Kreislaufwirtschaft, perfekte Nachhaltigkeit, geben und nehmen im Einklang, perfekte Nachhaltigkeit ist Utopie und schwer zu erreichen	4						0	Orange	nein	Dortmund
Gemeinschaft	4	E					0	Orange	nein	Dortmund
Konfrontation, Aufklärung	4	B					0	Orange	nein	Dortmund
Nachhaltigkeitspartys analog „Tupperware“	4	D					5	Blau	ja	Dortmund
Zugängliche Dachgärten (essbare Stadt, urbanes Gärtnern)	4	G	R				1	Blau	ja	Dortmund
Eltern sind Vorbilder!	4	E					2	Blau	ja	Dortmund
Mundraubtouren – Bezug zu regionalen und saisonalen Produkten	4	E	J	K			2	Blau	ja	Dortmund
Flächen für urbanes Gärtnern	4	G	R				3	Blau	ja	Dortmund
Schulungen des Kantinenpersonals und Gesundheitsmanagement	4	B					1	Blau	nein	Dortmund
Küchen für Spontannutzung zu Verfügung stellen	4	E	M				1	Blau	nein	Dortmund
Menschen animieren: bewusst essen muss als etwas Schönes empfunden werden z.B. durch gemeinsame Art Feste: essen nicht nebenbei, sondern zelebrieren (Problem: Ist das für alle möglich?)	4	N	O				1	Blau	nein	Dortmund
Raststätten/ Ruheräume in der Stadt schaffen	4	R					0	Blau	nein	Dortmund
Noch mehr Kommunikation (Social Media -> Bsp. foodsharing)	4	B	D				0	Blau	nein	Dortmund
Kochbücher, die alle diese nachhaltigen Rezepte/ Aspekte beinhalten	4	B	M				0	Blau	nein	Dortmund
Wenn Fleisch gekauft wird zum Beispiel darauf aufmerksam machen, womit Schweine/ Hühner/ etc. gefüttert werden, oder mit wie viel Wasser Getreide gegossen wird	4	C					0	Blau	nein	Dortmund
Firmen und alternative Caterer zusammenbringen	4	E					0	Blau	nein	Dortmund
Keine Verbote sondern Gebote!	4	F					0	Blau	nein	Dortmund
Saft/ Obststände	4	A					0	Blau	nein	Dortmund
Öffentliches Picknick/ Grillen/ Kessel/ Lagerfeuer	4	A	D				0	Blau	nein	Dortmund
Food Trucks (organisch)	4	A	I				0	Blau	nein	Dortmund
Gemeinsam bewusst essen	4	E	N	O			0	Blau	nein	Dortmund
Street Food Festivals	4	A	D				0	Blau	nein	Dortmund
Transparenz erzeugen, Spiegel vorhalten	4	C					3	Grün	ja	Dortmund
Wert-/ werbungsfreie Lebensmittel (Bewertung nur nach Inhalt, z.B. „mit x % Fruchtanteil“ anstatt „mit hohem Anteil an …“	4	D					7	Grün	ja	Dortmund
Verbraucher besuchen Bauernhöfe und sprechen über Tierhaltung, Düngung usw.	4	B					7	Grün	ja	Dortmund
Praxis und Theorie verbinden -> Bildung durch „Machen“	4	B					2	Grün	ja	Dortmund
Menschen den Leistungsdruck nehmen: damit mehr Zeit bleibt, Essen zu zelebrieren. Schnelllebigkeit verlangsamen	4	N	Q				2	Grün	ja	Dortmund
Vertrauen durch Ehrlichkeit schaffen	4	C					1	Grün	nein	Dortmund
Menschen persönlich berühren	4						2	Grün	nein	Dortmund
Lernen und Lehrende müssen viel mehr Wertschätzung bekommen	4	E	O				0	Grün	nein	Dortmund
Interdisziplinäre Informationsveranstaltungen (leicht und spielerisch)	4	B					0	Grün	nein	Dortmund
Verantwortlich handeln = Pflicht und Regeln (Bsp. öffentliche Fläche darf frei genutzt und gestaltet werden)	4						0	Grün	nein	Dortmund
Kunde (alle Wirtschaftszwecke solidarisch organisieren, neue logistische Prozesse), Landwirt Unternehmer (noch keine Notiz)	4						0	Grün	nein	Dortmund
Gemeinsam kochen und essen	4	E	M	N			0	Grün	nein	Dortmund
Bezahlbarkeit des „echten Produktpreises“ (Vollkosten) sicherstellen	4	H					3	Rot	ja	Dortmund
Kochkurse als Gemeinschaftserlebnis und Lernort für praktische Lebenserfahrung und Freude/ Lachen J	4	E	M				2	Rot	ja	Dortmund
Gesicherte staatliche Bildungsfinanzierung	4	F					2	Rot	ja	Dortmund
Der wahre Wert der Ware -> faire Marktbedingungen schaffen -> Regional (Arbeitsplätze)	4	H	J				3	Rot	ja	Dortmund
Massentierhaltung verbieten (plus neue strengere Düngemittelverordnung)	4	F					6	Rot	ja	Dortmund
Food Sharing ausbauen und Konservierungsmöglichkeiten wieder aufleben lassen	4	B	E				1	Rot	nein	Dortmund
Bessere Work-Life-Balance durch z.B. 6 Stunden statt 8 Stunden Arbeitstage	4	F	Q				1	Rot	nein	Dortmund
Foodassembling - Solidarische Landwirtschaft	4	E	G				1	Rot	nein	Dortmund
Differenzierte & geprüfte Kennzeichnungspflicht (regional, saisonal, ökologisch, vegan/ vegetarisch, samenfest)	4	C	F	I	J	K	1	Rot	nein	Dortmund
Ernährungsrat gründen	4	F					1	Rot	nein	Dortmund
Urban Gardening, SPIN-Farming, small plot intensive gardening	4	G	R				0	Rot	nein	Dortmund
Direkte Kontakte und Erfahrungsaustausch durch offene Zentren/ Infrastrukturen fördern	4	B	E				0	Rot	nein	Dortmund
Aufklärung über ungesunde Nahrungsmittel und auf sich anpassen	4	B					0	Rot	nein	Dortmund
Mit kreativen Aktionen Alternativen bieten/ aufzeigen	4	A	D				0	Rot	nein	Dortmund
Werbung: „Mund zu Mund“	4	D					0	Rot	nein	Dortmund
Einzigartigkeit jedes Lebensmittels in der Saison und Region hervorheben, Spiel und Erfahrung (Info in Schulen/ Lebensmittelläden)	4	B	D	J	K		0	Rot	nein	Dortmund
Staatliche Förderung von Eigenanbau (für Pflanzen)	4	F	G				0	Rot	nein	Dortmund
Klar und überprüfbare/ geprüfte Informationen	4	C					0	Rot	nein	Dortmund
Gesetze für Direktvermarktung (Schutzzölle?)	4	A	F				0	Rot	nein	Dortmund
Globale Gesetzgebung Strafen für Firmen bei Umweltverschmutzung und Förderung für Nachhaltigkeit	4	F					0	Rot	nein	Dortmund
Vorteile für Unternehmen herausstellen (Vertrauen, Kundenbindung)	4	B	D				0	Rot	nein	Dortmund
Kontrollen bei nachhaltiger Produktion erfordern Arbeitsplätze auch als Kaufgrund	4						0	Rot	nein	Dortmund
Unterstützung/ Plattform für Kleinunternehmer und Newcomer in Sachen Lobbyarbeit	4						0	Rot	nein	Dortmund

## Sheet: Daten_Kassel-Witzenhausen
Idee	Deduktive Codierung	Induktive Codierung					Punkte	Farbe	Favoritverwendung	Ort
Verderben, Konservierung	0						0	Gelb	nein	Kassel-Witzenhausen
Neue Wertmaßstäbe setzen, z.B. -Verbot von Zoos, Zirkussen mit Tieren etc. -Achtung von Tieren	0						0	Gelb	nein	Kassel-Witzenhausen
Keine Verschönung	0						0	Gelb	nein	Kassel-Witzenhausen
Langzeitwirkung/ Effekte von Zusätzen (Antibiotika) von genetischer Manipulation	0						0	Gelb	nein	Kassel-Witzenhausen
Nahrungsaufnahme – Mittel zum Zweck	0						0	Gelb	nein	Kassel-Witzenhausen
Wie kann in einer kurzlebigen Welt die Verknappung von Ressourcen vermittelt werden?	0						1	Orange	nein	Kassel-Witzenhausen
Welche Voraussetzung bzw. Situationen braucht es, welche eine Gesellschaft bzw. Individuen zum Handeln zu nötigen?	0						0	Orange	nein	Kassel-Witzenhausen
Unterschiede der Wahrnehmung in Menschenleben und Erdzeitaltern	0						0	Orange	nein	Kassel-Witzenhausen
Wie passen Leben im Überfluss mit der Hungersnot zusammen?	0						0	Orange	nein	Kassel-Witzenhausen
Unser Konsum beeinflusst Konsummöglichkeit anderer Menschen?	0						0	Orange	nein	Kassel-Witzenhausen
Verwertungs-Kreisläufe in urbanen Raum möglich?	0						0	Blau	nein	Kassel-Witzenhausen
Städte produzieren Müll - warum?	0						0	Blau	nein	Kassel-Witzenhausen
Braucht es Verpackung (Plastik)?	0						0	Blau	nein	Kassel-Witzenhausen
Die Dummen rennen, die Klugen warten, die Weisen gehen in den Garten.	0						0	Rot	nein	Kassel-Witzenhausen
Gesund kochen lernen	1	B	M				1	Gelb	nein	Kassel-Witzenhausen
Sich Zeit nehmen für das Einkaufen, Essen und Kochen	1	L	M	N	Q		0	Gelb	nein	Kassel-Witzenhausen
Wichtiger Schritt: Das Einkaufen -> Denn: Hat man keine ungesunden und nicht-nachhaltigen Produkte zuhause, isst man sie nicht oder jedenfalls weniger	1	L					0	Gelb	nein	Kassel-Witzenhausen
Lebensmittel vor Ort beziehen, z.B. Solawis, Landwirte, Bioläden, selbst Gärtnern, Gemüseparzellen, alten Obstbaumbestand (öffentlich) nutzen (an Wegesrändern)	1	A	I	L			3	Orange	ja	Kassel-Witzenhausen
Mehr Zeit in Alltag für Essen und Kochen; Reihum füreinander Kochen	1	M	N	Q			2	Blau	ja	Kassel-Witzenhausen
Zeit (genügend) zum Essen an der Arbeit/ Schule/ Uni einplanen	1	N	Q				3	Blau	ja	Kassel-Witzenhausen
Zeit nehmen für das Essen	1	N	Q				0	Blau	nein	Kassel-Witzenhausen
Individuellen Nutzen nachhaltiger Ernährung herausstellen	1	O					3	Grün	ja	Kassel-Witzenhausen
Zeit für Kochen und Essen als Ereignis	1	M	N	Q			0	Rot	nein	Kassel-Witzenhausen
Körpergefühl verbessern, in sich gehen	2	O					1	Gelb	nein	Kassel-Witzenhausen
Geschmack schulen	2	B					0	Gelb	nein	Kassel-Witzenhausen
Lebensmittelabfälle vermeiden	2						0	Gelb	nein	Kassel-Witzenhausen
Alles kann ich auf einmal sowieso nicht umsetzen, trotzdem will ich mich stetig weiterentwickeln -> regelmäßige Denkanstöße	2						0	Gelb	nein	Kassel-Witzenhausen
Mehr Auseinandersetzung mit dem Thema „Was der Fleischkonsum für Folgen hat“	2	B					0	Gelb	nein	Kassel-Witzenhausen
Oft keine „Kapazität“ für eingehende Beschäftigung -> Nachhaltigkeit muss auf allen Ebenen des Lebens ansetzen	2	Q					0	Gelb	nein	Kassel-Witzenhausen
Zeit für gesundes Essen/ selbst kochen	2	M	Q				0	Gelb	nein	Kassel-Witzenhausen
Noch mehr Wissen anreichern	2	B					0	Gelb	nein	Kassel-Witzenhausen
Prioritäten im eigenen Leben anders setzen	2	O					0	Gelb	nein	Kassel-Witzenhausen
Einfach machen/ umsetzen	2						0	Gelb	nein	Kassel-Witzenhausen
Ist „neu“ immer besser? Kann ich von den Vorfahren evtl. mehr lernen als von allen aktuellen „Expertenmeinungen“ zusammen?	2						1	Orange	nein	Kassel-Witzenhausen
Nur, wenn ich den Ort kenne, wo mein Lebensmittel herkommt, kann ich guten Gewissens essen. -> sich beim Essen immer der Ursprungsort der Lebensmittel bildlich vorstellen!	2	B	C				1	Orange	nein	Kassel-Witzenhausen
In einem wohligen/ harmonischen Umfeld auf das Thema Nachhaltigkeit eingehen (Familien, Feste, Natur, usw.)	2						0	Orange	nein	Kassel-Witzenhausen
Systeme kritisch hinterfragen, neue Lösungswege, Alternative finden	2	B					0	Orange	nein	Kassel-Witzenhausen
Selber Nachdenken/ Handeln ohne sich „höheren Mächten“ zu unterwerfen	2						0	Orange	nein	Kassel-Witzenhausen
Persönlichen Bezug zum Lebensmittel herstellen. -Herstellung /Produktion -Art der Essensaufnahme, z.B. händisch	2						4	Blau	ja	Kassel-Witzenhausen
Freunde zum gemeinsamen Kochen einladen	2	E	M				2	Blau	ja	Kassel-Witzenhausen
Vor dem (Ein-)Kaufen überlegen	2	M	O				0	Blau	nein	Kassel-Witzenhausen
Achtsam essen, schmecken	2	N	O				0	Blau	nein	Kassel-Witzenhausen
Spaß beim Kochen	2	M					0	Blau	nein	Kassel-Witzenhausen
Freude am Essen -> gemeinsam Essen	2	E	N				0	Blau	nein	Kassel-Witzenhausen
Verantwortung übernehmen	2						3	Grün	ja	Kassel-Witzenhausen
Mehr Möglichkeiten um unterwegs (schnell) gesund und nachhaltig zu essen	3	A					1	Gelb	ja	Kassel-Witzenhausen
Realer Preis für Nahrung -> für Fleisch	3	H					2	Gelb	ja	Kassel-Witzenhausen
Strukturen für Verpackungsfreien Einkauf stärken	3	A	S				1	Gelb	ja	Kassel-Witzenhausen
Gesunde Ernährung muss in öffentlichen Mensen/ Kantinen wichtiger als Preis sein	3	A	H				1	Gelb	nein	Kassel-Witzenhausen
Angemessene Preise für Lebensmittel -> keine Dumpingpreise mehr	3	H					1	Gelb	nein	Kassel-Witzenhausen
Mehr Biorestaurants	3	A	I				0	Gelb	nein	Kassel-Witzenhausen
Mensa auf Bio und vegetarisch umstellen	3	A	I				0	Gelb	nein	Kassel-Witzenhausen
Kochen lernen in der Schule/ Kindergarten	3	B	M				0	Gelb	nein	Kassel-Witzenhausen
Angebotsverknappung -> Rationierung von tierischen Lebensmitteln	3	A					0	Gelb	nein	Kassel-Witzenhausen
Größere Bioauswahl in Supermärkten	3	A	I				0	Gelb	nein	Kassel-Witzenhausen
Bezahl 2 Kauf 3 Aktionen umwandeln in Kauf 2 Bio, bekomme 1 eine Woche später	3	D	I				0	Gelb	nein	Kassel-Witzenhausen
Restaurants: Lebensmittel/ Gerichte am Ende des Tages kostenlos abgeben an Verbraucher	3	A					0	Gelb	nein	Kassel-Witzenhausen
Mehr Biorestaurants in Städten	3	A	I	R			0	Gelb	nein	Kassel-Witzenhausen
In Städten als Willkommensgeschenk für Neuankömmlinge, z.B. 1 Monat Bio-Kiste frei Haus	3	A	I	R			0	Gelb	nein	Kassel-Witzenhausen
Ernährungsampel für Tierwohl/ Natur/ Gesundheit auf Packungen	3	B	C	S			0	Gelb	nein	Kassel-Witzenhausen
Punkte/ Prämiensystem in Supermärkten für Kauf von Bioprodukten	3	D	I				0	Gelb	nein	Kassel-Witzenhausen
Mehr Aufklärung über die Herkunft der Lebensmittel	3	B	C				0	Gelb	nein	Kassel-Witzenhausen
Kochkurse mit Schwerpunkt Regionalität und Saisonalität in der Schule	3	J	K	M			0	Gelb	nein	Kassel-Witzenhausen
Durch massive Besteuerung nicht-nachhaltig erzeugter Produkte	3	F					0	Gelb	nein	Kassel-Witzenhausen
Erziehungsregeln bei Kindern darauf anpassen. „Nachhaltige Ernährung“ als Schulfach, ökologische Höfe für Klassenfahrten, Verbannung von Zucker und tierischen Produkten aus der Ernährung -> hin zu pflanzlicher Kost	3	B					0	Gelb	nein	Kassel-Witzenhausen
Aufklärung: Trailer/ Kurzfilm über nachhaltige und gesunde Ernährung vor Hauptfilmen in öffentliche Kinos	3	B	D				0	Gelb	nein	Kassel-Witzenhausen
Lebensmittel in sich selbst verpacken z.B. Tomaten in „Grünabfällen“, die kompostierbar sind	3	S					3	Orange	ja	Kassel-Witzenhausen
Durch lose Waren (Unverpacktläden) bedarfsgerechten Einkauf ermöglichen und so Lebensmittelverschwendung eindämmen (Vorteilspackungen für Frischprodukte verleiten zu unsinnigem Einkauf)	3	A	L	S			2	Orange	ja	Kassel-Witzenhausen
Bildung (was Ernährung/ Nachhaltigkeit, etc.) angeht in Schulen, Kitas, Arbeitsämtern, Universitäten, VHS...	3	B					4	Orange	ja	Kassel-Witzenhausen
Persönlicherer Bezug zum Essen kann nur funktionieren, wenn ich vom Produzenten eine Story mitgeliefert kriege	3	B	C	D	G		0	Orange	nein	Kassel-Witzenhausen
„Alte Küche“ als tierische Produkte Luxus waren, ebenso wie exotische Produkte, wiederaufleben lassen	3	P					0	Orange	nein	Kassel-Witzenhausen
Gemeinschaften fördern -> gemeinsames Kochen/ Kochkurse/ Kräuterspaziergänge/ Obst in der Stadt Spaziergänge	3	E	M	R			0	Orange	nein	Kassel-Witzenhausen
Umstellung großer Unternehmen auf Bio z.B. DB -> Essen/ Getränke im Zug/ Fluggesellschaften	3	A	I				2	Blau	ja	Kassel-Witzenhausen
Imbissbuden mit mehr pflanzlich/ saisonal/ regionalen Angeboten	3	A	J	K			4	Blau	ja	Kassel-Witzenhausen
Transparenz bei regionaler Erzeugung (wo fanden einzelne Schritte der Produktionskette statt?) -> Ferkel -> Mast -> Schlachtung (Welcher Schritt definiert Regionalität?)	3	C	G	J			1	Blau	nein	Kassel-Witzenhausen
Bio-kette (Fast Food) mit verantwortungsvollen Werten und Firmenphilosophie	3	A	I				0	Blau	nein	Kassel-Witzenhausen
Bio Fastfood aus der Region	3	A	I	J			0	Blau	nein	Kassel-Witzenhausen
Nachhaltigere Außerhausverpflegung (weg von schwerer tierischer Kost - hin zu leichter pflanzlicher Kost)	3	A					0	Blau	nein	Kassel-Witzenhausen
Nachhaltige Verpackung für bio-convenience Produkte	3	I	S				0	Blau	nein	Kassel-Witzenhausen
Neue pädagogische Konzepte z.B. vegetarisches Essen/ Bio- Fleisch in Schulen, Mensen, Kantinen -> Schaukochen in Fußgängerzonen, Bildung in Schulen, Kindergärten, Kitas	3	A	B	I	M		3	Grün	ja	Kassel-Witzenhausen
Ältere Schüler erzählen auf interaktive Weise, jüngeren Schülern über Ernährung/ Auswirkung und Werte -> so lernen beide Schülergruppen über Werte bezogen auf Ernährung anstatt von außen einen langweiligen Vortrag zu hören	3	B					2	Grün	ja	Kassel-Witzenhausen
Ernährungschallenges: Miteinander und Gegeneinander mit Belohnung bei Erreichen der nächsten Stufe -> z.B. Kaufe Biogemüse, was du noch nie gekauft hast und bekoche den anderen mit einem leckeren Rezept	3	E	I	L	M		0	Grün	nein	Kassel-Witzenhausen
Subventionierung von pflanzlichen Lebensmitteln: Erzeuger -> Saatgut, Verbraucher -> Endprodukt	3	F					2	Rot	ja	Kassel-Witzenhausen
Promis als Werbeträger für nachhaltige Ernährung (Vorbilder)	3	D					3	Rot	ja	Kassel-Witzenhausen
Bei Tierprodukten Herkunft der Tiere und des Futters transparent darstellen	3	C					1	Rot	ja	Kassel-Witzenhausen
Höherer Steuersatz für Tierisches und Ungesundes. Niedrigere für pflanzliche und gesunde Lebensmittel	3	F					5	Rot	ja	Kassel-Witzenhausen
Gesunde Lebensmittel leicht verfügbar machen durch Schul-/ Kindergartenspeisen, Mensen, Kantinen, Catering, Krankenhäuser…	3	A					1	Rot	ja	Kassel-Witzenhausen
Positiv belegen von gesunder Esskultur -> über Trend	3	D	P				0	Rot	nein	Kassel-Witzenhausen
Sensibilisieren und Verbraucher das Gefühl geben, dass die individuelle Kauf-/ Konsumentscheidung bedeutsam ist	4	B					2	Gelb	ja	Kassel-Witzenhausen
Mehr Aufklärung in Schulen! -> Kinder inspirieren wiederum ihre Eltern	4	B					1	Gelb	ja	Kassel-Witzenhausen
Mehr solidarische Landwirtschaft	4	E	G				3	Gelb	ja	Kassel-Witzenhausen
Die Selbstversorgung sollte gefördert werden, damit die Verbindung zwischen Tier/ Pflanze und Mensch intensiver und nachvollziehbar wird	4	G					3	Gelb	ja	Kassel-Witzenhausen
Externe Kosten internalisieren	4	F	H				4	Gelb	ja	Kassel-Witzenhausen
Gemeinschaftsgärten (als Einstiegshilfe)	4	E	G				1	Gelb	nein	Kassel-Witzenhausen
Mehr Bildung über Nachhaltigkeit in Schulen	4	B					1	Gelb	nein	Kassel-Witzenhausen
Unnötige Verpackungen verbieten	4	S					1	Gelb	nein	Kassel-Witzenhausen
Hofläden, offene landwirtschaftliche Betriebe, Eigenverarbeitung der Produkte statt Discounter und Supermärkte	4	A	G				1	Gelb	nein	Kassel-Witzenhausen
Verbot gewisser Substanzen, Verpackungen, Haltungsformen, Methoden, ...	4	F	S				1	Gelb	nein	Kassel-Witzenhausen
Essenskultur aufwerten	4	P					0	Gelb	nein	Kassel-Witzenhausen
Kochgruppen/ Ernährungsgruppen bilden	4	E	M				0	Gelb	nein	Kassel-Witzenhausen
Von Klein auf: Kindergärten, Schulen, Mensen, Kantinen	4	A					0	Gelb	nein	Kassel-Witzenhausen
Soli- Obstwiesen (Mundraub)	4	A	E				0	Gelb	nein	Kassel-Witzenhausen
Gewissens-App	4	D					0	Gelb	nein	Kassel-Witzenhausen
Faire Entlohnung für faire (Produktions-)Bedingungen	4	F					0	Gelb	nein	Kassel-Witzenhausen
Nudges	4						0	Gelb	nein	Kassel-Witzenhausen
Containern legalisieren	4	F					0	Gelb	nein	Kassel-Witzenhausen
Solawi	4	E	G				0	Gelb	nein	Kassel-Witzenhausen
Ernährungsrat	4	F					0	Gelb	nein	Kassel-Witzenhausen
Vernetzung von Wissenden mit Nicht-wissenden durch Mentorenprogramme	4	B	E				0	Gelb	nein	Kassel-Witzenhausen
Keine konventionelle Landwirtschaft mehr	4	F	G				0	Gelb	nein	Kassel-Witzenhausen
Ernährungsrat	4	F					0	Gelb	nein	Kassel-Witzenhausen
Schilder mit Wasser/ CO2 Verbrauch direkt neben Lebensmittel im Supermarkt	4	C	D				0	Gelb	nein	Kassel-Witzenhausen
Tierbilder auf Fleischpackungen wie Zigarettenpackung	4	B	C	D			0	Gelb	nein	Kassel-Witzenhausen
Ernährungsdokus als Prämie für Einkäufe	4	B	D				0	Gelb	nein	Kassel-Witzenhausen
Verbraucherbildung/ -informationen in Supermärkten (LEH)	4	B					0	Gelb	nein	Kassel-Witzenhausen
Transparenz bzgl. Produktionsprozesse „Schock-Fotos“ à la Zigarettenpackungen??	4	B	C	D			0	Gelb	nein	Kassel-Witzenhausen
Weniger Auswahl macht die Entscheidung einfacher! -> Angebot, wer gestaltet das?	4	A					0	Gelb	nein	Kassel-Witzenhausen
„Konsumenten“ mit einbeziehen -> persönliche Story muss her	4						0	Gelb	nein	Kassel-Witzenhausen
Ökonomische Zwänge verhindern oft eine „gute“ Auswahl -> dem „Markt“ die Zähne brechen?	4	A	F				0	Gelb	nein	Kassel-Witzenhausen
Diskurs zwischen Verbrauchern und Erzeugern fördern/ Treffpunkte schaffen	4	B	E				0	Gelb	nein	Kassel-Witzenhausen
„Einkaufshilfen“, Rezepte -> Barrieren abbauen	4	B	L				0	Gelb	nein	Kassel-Witzenhausen
Motivationsanreize	4						0	Gelb	nein	Kassel-Witzenhausen
Einblicke in Produktion	4	C	G				0	Gelb	nein	Kassel-Witzenhausen
Konfrontation	4	B					0	Gelb	nein	Kassel-Witzenhausen
Werbung für „Ungesundes“ -> Risiko aufzeigen wie bei Zigaretten	4	B	D				0	Gelb	nein	Kassel-Witzenhausen
Mehr Wissen über die Produkte -> Transparenz	4	B	C				0	Gelb	nein	Kassel-Witzenhausen
Zutatenlisten – mit größerem Stellenwert	4	C					0	Gelb	nein	Kassel-Witzenhausen
Lebensmittelverpackungen mit Hinweisen	4	B	C				0	Gelb	nein	Kassel-Witzenhausen
Versorgung ohne internationale Importe	4	A	F				0	Gelb	nein	Kassel-Witzenhausen
Regionale Läden	4	A	J				0	Gelb	nein	Kassel-Witzenhausen
Aufklärung	4	B					0	Gelb	nein	Kassel-Witzenhausen
Durch monetären Anreiz z.B. günstigere Krankenversicherungsbeiträge, subventionierte Obst- und Gemüseprodukte	4	F	H				0	Gelb	nein	Kassel-Witzenhausen
„Soziale Kontrolle“ innerhalb Familien und WG-Zusammenhänge	4	E					0	Gelb	nein	Kassel-Witzenhausen
Fläche pro Kopf für bedarfsgerechte Ernährung	4						0	Gelb	nein	Kassel-Witzenhausen
Versorgung „zeitgenössischer“ Lebensweisen: Single, Dinkis, Pendler	4	A					0	Gelb	nein	Kassel-Witzenhausen
Wissen weiter kommunizieren	4	B					0	Gelb	nein	Kassel-Witzenhausen
Luxus: Ernährung und Nahrung	4						0	Gelb	nein	Kassel-Witzenhausen
Ernährung von Ärzteseite mehr gewichten	4	B					0	Gelb	nein	Kassel-Witzenhausen
Kochen, Backen, Einmachen, Konservieren, Vorratshaltung... wieder attraktiver machen, bzw. handwerkliches Können vermitteln	4	B	D	M	P		2	Orange	ja	Kassel-Witzenhausen
Kreislaufwirtschaft als Standard etablieren	4	G					1	Orange	ja	Kassel-Witzenhausen
Sich zusammen tun	4	E					1	Orange	ja	Kassel-Witzenhausen
Ökologischen Fußabdruck auf dem Produkt verzeichnen	4	C					5	Orange	ja	Kassel-Witzenhausen
Ökologischen Fußabdruck der Produkte bestimmen, denn: ein deutscher Lagerapfel ist nicht zwangsläufig „nachhaltiger“ als ein Importprodukt (auch, wenn das schön wäre!)	4	B					1	Orange	nein	Kassel-Witzenhausen
Positive Zukunftsszenarien entwerfen, die einfach umzusetzen sind -> realitätsnah, mit dem Menschen	4						1	Orange	nein	Kassel-Witzenhausen
Ernährungsbewusstsein mit kulturellen Aktionen (Bsp. Gemeinschaftsprojekt von Künstlern aus allen Ländern fördern: Komponieren, Dichten, Malen)	4	D	O	P			0	Orange	nein	Kassel-Witzenhausen
Anti-Konsumgesellschaft -> Trend; Wie viel Essen brauche ich wirklich -> weniger wegwerfen	4	A	D	E			0	Orange	nein	Kassel-Witzenhausen
Banderolen statt Plastikverpackungen zur Differenzierung von Lebensmitteln	4	S					0	Orange	nein	Kassel-Witzenhausen
Konkrete Handlungsvorschläge machen und deren Nachhaltigkeitsimpact anzeigen (low vs. high)	4	B					0	Orange	nein	Kassel-Witzenhausen
Durch eindeutige und selbsterklärende Labels Rückverfolgbarkeit ermöglichen	4	B	C				0	Orange	nein	Kassel-Witzenhausen
Geplanter Obsoleszenz entgegenwirken (Gesetze, Zertifikat, Prämien)	4	F					0	Orange	nein	Kassel-Witzenhausen
Wie gelingt eine gerechte Verteilung von Nahrungsmitteln?	4						0	Orange	nein	Kassel-Witzenhausen
Mehr Meditationskurse anbieten in Schulen/ Unternehmen, um Glück/ Zufriedenheit in sich und nicht in äußeren Sachen zu finden	4						0	Orange	nein	Kassel-Witzenhausen
Landwirtschaft in Lehrplan integrieren -> Lebensmittelproduktion und gesundheitsbezogene Aspekte	4	B	G				3	Blau	ja	Kassel-Witzenhausen
Ressourcenschonende Produktion (z.B. bei Elektrik austauschbare Materialien)	4	G					2	Blau	ja	Kassel-Witzenhausen
Wertschätzung von Lebensmitteln fördern	4	O					1	Blau	nein	Kassel-Witzenhausen
Slow-Food	4	D	E	O	P		1	Blau	nein	Kassel-Witzenhausen
Weg von der Wegwertgesellschaft! (Reparatur statt Vernichtung!)	4						1	Blau	nein	Kassel-Witzenhausen
Füreinander sorgen mit gesundem Essen	4	E					0	Blau	nein	Kassel-Witzenhausen
Esskultur (wieder-) herstellen	4	P					0	Blau	nein	Kassel-Witzenhausen
Biomüll Verwertung in Stadt-Gärten	4	R					0	Blau	nein	Kassel-Witzenhausen
Alternativkonsum für Feste und Feiern (z.B. Weihnachtsbraten)	4	A	E				0	Blau	nein	Kassel-Witzenhausen
Gemeinschaftlichkeit beim Essen und Kochen	4	E	M	N			0	Blau	nein	Kassel-Witzenhausen
Definition zu Regionalität entwickeln	4	J					0	Blau	nein	Kassel-Witzenhausen
Rezeptideen Inspirationen	4	B					0	Blau	nein	Kassel-Witzenhausen
Soziale Kontrolle	4	E					0	Blau	nein	Kassel-Witzenhausen
Rezeptideen austauschen (z.B. vegane Kuchen)	4	B	E				0	Blau	nein	Kassel-Witzenhausen
Auf Verbrauch(er) angepasster Vertrieb	4	A					0	Blau	nein	Kassel-Witzenhausen
Landbaupraktika für alle Schüler	4	B	G				1	Grün	ja	Kassel-Witzenhausen
Anreize (monetär) für Müllentsorgung/ Recycling schaffen	4						4	Grün	ja	Kassel-Witzenhausen
Kommunen -> Feste/ Märkte: Probieren von alten Sorten. Themenbezogene Stände, Infos, Spiele, Rezepte	4	B	D				4	Grün	ja	Kassel-Witzenhausen
Eingeschränktes Angebot z.B. nur regional. Trotzdem kann man viele Bedürfnisse abdecken (ein Laden für alles)	4	A	J				2	Grün	ja	Kassel-Witzenhausen
Foodsharing Verteilerlisten	4	E					1	Grün	nein	Kassel-Witzenhausen
Umdenken fördern	4	B					1	Grün	nein	Kassel-Witzenhausen
Kommunikation, Akzeptanz	4	B					0	Grün	nein	Kassel-Witzenhausen
Bildungsarbeit/ Erlebnispädagogik	4	B					0	Grün	nein	Kassel-Witzenhausen
Permakultur „Showflächen“ auf Grünflächen in Städten	4	G	R				0	Grün	nein	Kassel-Witzenhausen
Lobbyismus unterbinden	4	F					2	Rot	ja	Kassel-Witzenhausen
Anreize für ökologische Produktion: monetär, Prestige, garantierte Abnahme durch Verarbeiter	4	F	E				2	Rot	ja	Kassel-Witzenhausen
Umweltkosten in Produktkosten einbeziehen	4	H					4	Rot	ja	Kassel-Witzenhausen
Brennnesseln als Superfood etablieren	4	D					1	Rot	nein	Kassel-Witzenhausen
Förderung von ökologischer bäuerlicher Landwirtschaft - Kleinbetriebe statt Großbetriebe	4	F	G				1	Rot	nein	Kassel-Witzenhausen
Urban Gardening in Freiflächen/ unbenutzten Stadtflächen/ Parks/ Grünstreifen	4	G	R				1	Rot	nein	Kassel-Witzenhausen
Energiepreise erhöhen/ besteuern	4	F					1	Rot	nein	Kassel-Witzenhausen
Bildung: Bewusstsein und Information über Nahrung -> Nähe, Identifikation	4	B	O				0	Rot	nein	Kassel-Witzenhausen
Begrenzter Import	4	A	F				0	Rot	nein	Kassel-Witzenhausen
Subventionierung	4	F					0	Rot	nein	Kassel-Witzenhausen
Förderung von kleinstrukturierter Landwirtschaft mit größerer Einbeziehung der Verbraucher	4	F	G	E			0	Rot	nein	Kassel-Witzenhausen
Unterstützung von Kleinunternehmern auch durch Verbraucher	4	G	E				0	Rot	nein	Kassel-Witzenhausen
Negativ Gentechnikkennzeichnung	4	C	F				0	Rot	nein	Kassel-Witzenhausen
EU-Normen nachhaltig gestalten (und z.B. Lebensmittelabfälle vermeiden)	4	F					0	Rot	nein	Kassel-Witzenhausen
Anzahl des Spritzens auf Produkt kennzeichnen (vielleicht der Durschnitt)	4	C					0	Rot	nein	Kassel-Witzenhausen
Kleinbäuerliche Strukturen stärken	4	G					0	Rot	nein	Kassel-Witzenhausen
Überdüngung verbieten -> Richtlinien eventuell strenger	4	F					0	Rot	nein	Kassel-Witzenhausen
Direktvermarktung: Landwirt -> Kundenkontakt	4	A	G				0	Rot	nein	Kassel-Witzenhausen
Food Chains verkürzen (z.B. Food Coop)	4						0	Rot	nein	Kassel-Witzenhausen
Bildungsarbeit unabhängig von z.B. großen Konzernen (ebenso Forschung)	4	B					0	Rot	nein	Kassel-Witzenhausen
Veröffentlichungspflicht aller Forschung (innerbetrieblich schwierig)	4	B					0	Rot	nein	Kassel-Witzenhausen
Schutz regionaler Produktion ( z.B. Label…)	4	F	J				0	Rot	nein	Kassel-Witzenhausen
Auf die Macht der Konzerne aufmerksam machen	4	B					0	Rot	nein	Kassel-Witzenhausen
Förderung von Bewegung in allen Altersklassen	4						0	Rot	nein	Kassel-Witzenhausen
Ambivalente Berichterstattung fördern	4	B	D				0	Rot	nein	Kassel-Witzenhausen
Transparente Politik	4	C	F				0	Rot	nein	Kassel-Witzenhausen
Abschaffung von Plastikverpackung	4	S					0	Rot	nein	Kassel-Witzenhausen
Entlohnung konkreter Umweltmaßnahmen in Produktion/-skette	4						0	Rot	nein	Kassel-Witzenhausen

## Sheet: Daten_Hamburg
Idee	Deduktive Codierung	Induktive Codierung					Punkte	Farbe	Favoritverwendung	Ort
Mehr Praxiserfahrungen	0						0	Gelb	nein	Hamburg
Mehr Ressourcen nutzen	0						0	Gelb	nein	Hamburg
Hände weg von der Natur!	0						2	Orange	ja	Hamburg
Angst vor menschlichen Einfluss und Vernichtung des Lebens (aus Wasser wird Politik)	0						0	Orange	nein	Hamburg
Wasser als Ursprung für Leben und Hoffnung wird als Geschenk Gottes betrachtet	0						0	Orange	nein	Hamburg
Geiz ist ungeil – Buttons mit solchen Sprüchen tragen	0						1	Blau	ja	Hamburg
Sünder an den Pranger stellen!	0						0	Blau	nein	Hamburg
Natürliche Auslese	0						0	Rot	nein	Hamburg
Man braucht den Neustart, vom Körper auch von der Besinnung. Ich mache die Tage ohne essen, nur Wasser. Zwei Mal pro Jahr machen ich 7-14 Tage Hungern (Fastenkur)	1	O					0	Gelb	nein	Hamburg
Problem: Zeitdruck -> keine nachhaltige Ernährung möglich; Lösung: Zeit finden, sich Zeit zum Essen nehmen	1	N	Q				1	Blau	nein	Hamburg
Ideen für schnelle, nachhaltige Ernährungsoptionen finden (z.B. mehr Rezepte, mehr nachhaltige Restaurants)	1	A					0	Blau	nein	Hamburg
Integration von Sport und gesunden Lebensmitteln in den Arbeitsalltag	2						3	Gelb	ja	Hamburg
Mehr Eigenverantwortung übernehmen	2						0	Gelb	nein	Hamburg
Mehr Wissen erlangen	2	B					0	Gelb	nein	Hamburg
Eine Woche/ ein Monat ideale Ernährung praktizieren, ausprobieren	2						0	Gelb	nein	Hamburg
Selber kochen (lernen)	2	B	M				0	Gelb	nein	Hamburg
Selber gärtnern (für ein wenig Selbstversorgung und viel Einblick)	2	G					0	Gelb	nein	Hamburg
Auch mal Anlagen der Massentierhaltung besuchen bzw. den Versuch dokumentieren	2	B					0	Gelb	nein	Hamburg
Höfe besuchen, ganz verschiedene (große, kleine, Bio, Konventionelle)	2	B	G	I			0	Gelb	nein	Hamburg
Lebensmittel selber anbauen (-> Gemeinschaftsgärten, Kitas, Schulen...)	2	B					0	Gelb	nein	Hamburg
Man darf nicht zu hohe Ansprüche haben (-> nicht „perfekt“ sein wollen)	2						0	Gelb	nein	Hamburg
Ich brauche Gleichgesinnte zum Mitmachen (-> Peer)	2	E					0	Gelb	nein	Hamburg
Ich tausche Kochen gegen eine andere Dienstleistung	2	M					0	Gelb	nein	Hamburg
Viel Mehr bewegen, weniger essen	2	N					0	Orange	nein	Hamburg
Zwischen Gerechtigkeit und Massentierhaltung Lücke schließen -> Selber Hühner halten	2						0	Orange	nein	Hamburg
Zwischen Gerechtigkeit und Massentierhaltung Lücke schließen -> Höfe besuchen, immer wieder zumindest versuchen	2	B					0	Orange	nein	Hamburg
Mehr Zeit	2	Q					0	Blau	nein	Hamburg
Hintergründe kennen	2	B					0	Blau	nein	Hamburg
Entwicklung von Umsetzungsstrategien	2						0	Grün	nein	Hamburg
Motivation!	2						0	Grün	nein	Hamburg
Beobachten -> selbstständig denken -> zum selbstständigen Handeln animieren	2	B					0	Grün	nein	Hamburg
Ein „Haus der Region“ mit Café, Kuchen, Shop, Bäckerei, Metzgerei, Rösterei, wo man sich treffen und kochen lernen kann, bzw. Lebensmittel herstellen	3	A	E	J			2	Gelb	ja	Hamburg
Stadt als Akteur gewinnen! Ansätze (Bio, Vegan, Regional) in Mensen, Förderung von Regionalität und neuen innovativen Ideen!	3	A	I	J	R		2	Gelb	ja	Hamburg
Fleisch und Milchprodukte verteuern	3	H					2	Gelb	ja	Hamburg
Belohnungssysteme für nachhaltige Ernährung schaffen	3						5	Gelb	ja	Hamburg
In jeden Stadtteil einen Gemüsegarten für alle (Allmende)	3	E	R				2	Gelb	ja	Hamburg
Essbare Stadt: freies Obst, Nüsse, Gemüse für alle ( die Verwaltung gibt ihr okay)	3	E	R				0	Gelb	nein	Hamburg
Eine eigene Geldwährung nur für Bio (Produkt-Kochen-Gärtnern)	3	I					0	Gelb	nein	Hamburg
Ein Bio-Social-Club wo Wissen und Waren geteilt werden	3	E	I				0	Gelb	nein	Hamburg
Menschen zeigen, dass nachhaltige Ernährung mit einem kleinen Budget zu verbinden ist!	3	B	H				0	Gelb	nein	Hamburg
Problem: Menschen verbinden mit Ernährungsumstellung Verzicht; Lösung: Den Begriff „Verzicht“ vermeiden!	3						0	Gelb	nein	Hamburg
Finanzielle Unterstützung für sehr nachhaltige Ernährungsformen	3	F					0	Gelb	nein	Hamburg
Problem: desinteressierte Jugend; Lösung: Jugend nachhaltige Ernährung nahebringen -> sie sind die Zukunft!	3	B					0	Gelb	nein	Hamburg
Fastfood-Ketten (McDonald´s und Co.) abschaffen oder zumindest Filialen einschränken, stattdessen gesunde und nachhaltige Einzelhandel (z.B. Salatbars)	3	A	F				0	Gelb	nein	Hamburg
Mehr Veranstaltungen über alternative Ernährungsformen, z.B. wie veganes Straßenfest	3	D					0	Gelb	nein	Hamburg
Kochen und essen als Genuss und Hobby für Freizeit interessant machen, gemeinsam kochen...	3	E	M	N			0	Gelb	nein	Hamburg
Eine Produktdatenbank, die die wahren Kosten (Ressourcenverbrauch etc.) einpreist (z.B. Wurst Aldi 0,69€ -> Erdwahre Kosten 2,69 €)	3	B	C	H			6	Orange	ja	Hamburg
Solidarische Landwirtschaft bekannter machen -> mehr Hofläden	3	A	D	E	G		1	Orange	nein	Hamburg
Apps für Information über Nachhaltigkeit beim Einkauf	3	D	L				0	Orange	nein	Hamburg
Kampagnen entwickeln die verdeutlichen das ein anderer Umgang mit Ernährung mir selbst und anderen zugutekommt	3	D					0	Orange	nein	Hamburg
Essbare Stadtkonzepte realisieren	3	R					2	Blau	ja	Hamburg
Gläserne Küche in Bio Fast Food-Küchen (alles wird offengelegt, auch Löhne)	3	A					0	Blau	nein	Hamburg
„Solidarprojekte“ -> Lokalgruppen zum gemeinsamen Handeln, Kinder- und Jugendgruppen -> über nachhaltige Ernährung lehren und animieren etwas zu tun	3	B	E				0	Grün	nein	Hamburg
Lebensmittelpreise müssen die Gesamtkosten darstellen	3	H					6	Rot	ja	Hamburg
Selber Kochen fördern	3	M					0	Rot	nein	Hamburg
Fast-Food-Ketten stoppen!	3	A	F				0	Rot	nein	Hamburg
Bio kann in regionaler Vernetzung die jeweilige Bevölkerung ernähren	3	I	J				0	Rot	nein	Hamburg
Schockierende Bilder aus Massentierhaltung zeigen – Realität abbilden	3	B	C	D			0	Rot	nein	Hamburg
Leicht verständliche nährwertangaben -> Ampel	3	B					0	Rot	nein	Hamburg
Kampagnen an Schulen/ in Kitas für Bio und nachhaltige Ernährung	3	D	I				0	Rot	nein	Hamburg
Ungesunde Lebensmittel vom Markt nehmen	3	A	F				0	Rot	nein	Hamburg
Eine Lebensmittel-Tauschbörse in der Nähe	4	A	E				1	Gelb	ja	Hamburg
Schulsystem umgestalten: Theorie und Praxis eines nachhaltigeren Lebensstils	4	B					2	Gelb	ja	Hamburg
Lobby der Lebensmittelindustrie politisch reglementieren	4	F					1	Gelb	nein	Hamburg
In jedem Stadtteil eine Volksküche, perfekt organisiert	4	E	M	R			1	Gelb	nein	Hamburg
Verbraucher braucht Informationen (die Wahrheit)	4	B					1	Gelb	nein	Hamburg
Aufklärungsansätze in der Schule	4	B					1	Gelb	nein	Hamburg
Globale Änderung der politischen Mächte ansteuern	4	F					0	Gelb	nein	Hamburg
Bildung (Bildung für nachhaltige Entwicklung) von klein auf	4	B					0	Gelb	nein	Hamburg
Bedürfnisse reduzieren – am Ende des Tages muss die Theke der Bäckerei nicht voll sein	4	A					0	Gelb	nein	Hamburg
Mensen/ Kantinen in Betrieben mit regionalen/ sozialen Produkten	4	A	J				0	Gelb	nein	Hamburg
Warenangebot reduzieren	4	A					0	Gelb	nein	Hamburg
Mehr Vernetzungen bilden	4	B					0	Gelb	nein	Hamburg
Problem: Gemütlichkeit; Lösung: Unterstützung, Motivation -> Werbung, soziale Medien	4	D					0	Gelb	nein	Hamburg
Problem: Preis (zu hoch); Lösung: Steuererleichterungen für Personen, die nachhaltig Leben -> nachhaltige Produkte konsumieren	4	F	H				0	Gelb	nein	Hamburg
Problem: nicht nachhaltige Produkte (-> Industrien) werden zu stark unterstützt; Lösung: Subventionen streichen/ kürzen -> nachhaltige Produkte subventionieren	4	F					0	Gelb	nein	Hamburg
Nachhaltig/ bio/ regional muss normal sein/ werden. Nicht-nachhaltig die „Ausnahme“	4	I	J				0	Gelb	nein	Hamburg
Rahmenbedingungen neu setzen externe Kosten in Produkte einpreisen. Nicht-nachhaltig darf nicht billiger sein	4	H					0	Gelb	nein	Hamburg
Aufklärung und Vermittlung ethischer Werte in der Schule	4	B					0	Gelb	nein	Hamburg
Menschen orientieren sich an „Vorbildern“ -> Promis, Politiker sollen einen nachhaltigen Lebensstil vorleben	4	D	E				0	Gelb	nein	Hamburg
Bildung und Aufklärung früh beginnen	4	B					0	Gelb	nein	Hamburg
Supermärkte mit saisonalen Produkten bzw. stärkere Ausschilderung	4	A	K				0	Gelb	nein	Hamburg
Ansätze wie: „Vegan Taste Week“ fördern!	4	D					0	Gelb	nein	Hamburg
Bewusstsein fördern, was in Lebensmitteln drinsteht!	4	O					0	Gelb	nein	Hamburg
Bewusstwerden, dass so ein hoher Verbrauch an tierischen Lebensmittel nicht „schon immer so war“!	4	O					0	Gelb	nein	Hamburg
Mehr Praxis (erleben), weniger Theorie (zerreden)	4	B					0	Gelb	nein	Hamburg
Weniger Ideologie (wer ist der bessere Mensch)	4						0	Gelb	nein	Hamburg
Einfache Heuristiken, die für jeden einsichtig sind	4						0	Gelb	nein	Hamburg
Wenn ich alt bin, gibt es ein Bio-Ernährungssystem, dass mich versorgt	4	I					0	Gelb	nein	Hamburg
Problem: Werbung und Verführung von Kunden; Lösung: Werbung gegen Verführung!	4	D					0	Gelb	nein	Hamburg
Menschen wissen, was mit Tieren und Umwelt geschieht -> es ihnen oft zeigen!	4	B					0	Gelb	nein	Hamburg
Problem: zu wenige Optionen -> zu unbekannt; Lösung: mehr Optionen, Werbung	4	A	D				0	Gelb	nein	Hamburg
Mehr Menschen den Zugang zu Wissen und Erfahrung sammeln bieten	4	B					0	Gelb	nein	Hamburg
Chemieindustrie kontrollieren, z.B. Pestizide Herstellung und Anwendung	4	F					0	Gelb	nein	Hamburg
Guerilla-Aktion: Im Laden Preisschilder auf Produkte kleben mit den „wahren Kosten“	4	D	E	H			2	Orange	ja	Hamburg
Regional-Rabatt, Inhabergeführt-Rabatt, Nachbarschafts-Rabatt (Nicht-online-Kauf-Rabatt)	4	D	J				1	Orange	ja	Hamburg
Zwischen Gerechtigkeit und Massentierhaltung Lücke schließen, Huhnaktie anbieten/ erwerben	4						1	Orange	ja	Hamburg
Verbot von Pestiziden und Kunstdünger	4	F					1	Orange	ja	Hamburg
Netzwerken, Kooperationen schaffen!	4	E					2	Orange	ja	Hamburg
Verpackungsarme Läden (-> Selbstabfüllung)	4	A	S				3	Orange	ja	Hamburg
Transparenz: alles hängt miteinander zusammen, Implikation des Handelns sichtbar machen	4	C					1	Orange	nein	Hamburg
Wegweiser erstellen (Orientierungslosigkeit)	4						0	Orange	nein	Hamburg
Gemeinsam findet man schneller aus dem Labyrinth -> Netzwerk	4	E					0	Orange	nein	Hamburg
Lebensmittelkauf im Westen reduzieren	4	L					0	Orange	nein	Hamburg
Lebensmittelauswahl reduzieren, keine Discounter mehr!	4	A					0	Orange	nein	Hamburg
Achtgeben auf Entwicklungsländer: keine Ausbeutung mehr -> mehr Spenden und Anbaumöglichkeiten	4	F					0	Orange	nein	Hamburg
Problem: „Angst“ etwas zu verändern; Lösung: Mut zusprechen -> Inspiration und Motivation	4						0	Orange	nein	Hamburg
Dem Westen die Situation in Entwicklungsländern vor das Auge bringen -> Wissen, zum Handeln animieren	4	B	F				0	Orange	nein	Hamburg
Vielfalt und Kreislaufwirtschaft statt Monokultur (Bsp. Permakultur)	4	G					0	Orange	nein	Hamburg
Immer wieder darauf hinweisen, dass die Möglichkeiten „unseres“ Planeten endlich (!) sind	4	B					0	Orange	nein	Hamburg
Immer wieder die persönliche Mitverantwortung für „unseren“ Planeten deutlich machen	4	B					0	Orange	nein	Hamburg
Immer wieder auf die einmalige Chance hinweisen, die unser Planet dem „Leben“ bietet	4	B					0	Orange	nein	Hamburg
Auf Menschen zugehen, nicht zu verurteilen, sondern Möglichkeiten aufzeigen	4	E					0	Orange	nein	Hamburg
Problem: viele haben nicht das Gefühl, dass sie allein etwas verändern können; Lösung: durch Organisation zeigen, dass viele dabei sind	4	E					0	Orange	nein	Hamburg
Problem: viele verdrängen die Zeit und die Probleme; Lösung: zeigen, dass Probleme entstehen/ bald entstehen werden	4	B					0	Orange	nein	Hamburg
Naturnahe Landwirtschaft fördern mi vielen unterschiedlichen Kulturen (Vielfalt)	4	G					2	Blau	ja	Hamburg
Verantwortungsvolle Schulverpflegung – Lerneffekt der Kinder	4	A	B				5	Blau	ja	Hamburg
Eigenverantwortung fördern	4						1	Blau	ja	Hamburg
Offenlegung zu Produktionsweisen, Transportwege, Inhaltsstoffe -> durch Gesetz geben	4	C	F				4	Blau	ja	Hamburg
Selbstversorgerstadt	4	G	R				1	Blau	ja	Hamburg
Bio Sortiment an der Tankstelle/ Raststätte/ Bahnhofskiosk/ Krankenhauskiosk/ Flugplatz	4	A	I				2	Blau	ja	Hamburg
Das Vertrauen des Verbrauchers in den Produzenten wiederherstellen - Ethik	4	C					1	Blau	nein	Hamburg
Den Menschen den Gedanken einpflanzen, dass weniger oft mehr bedeutet. Weniger konsumieren – gesünder (seelisch und körperlich) leben	4						1	Blau	nein	Hamburg
Zertifizierung auf Prüfstand stellen	4	F					0	Blau	nein	Hamburg
Transparenz	4	C					0	Blau	nein	Hamburg
Informationen über Produkte vernetzen -> Wo bekomme ich was?	4	B	E				0	Blau	nein	Hamburg
Vegan-Check (Woher kommt Soja? Gentechnikfrei? Welche E-Nummern? Lebensmittel-Deklaration -> Ampel)	4	B	C				0	Blau	nein	Hamburg
Bodenfruchtbarkeit erhalten durch Kreislaufwirtschaft	4	G					0	Blau	nein	Hamburg
„Es ist zu spät“ -> Demotivation; Zeigen, dass es nie zu spät ist um etwas zu verändern/ besser zu machen	4	B					0	Blau	nein	Hamburg
Alternativen Schaffen!	4						0	Blau	nein	Hamburg
Gemeinsame Ziele und Kriterien erarbeiten und festlegen; Gemeinsam umsetzen, bei wem einkaufen; Gemeinsam Kochen und genießen	4	E	L	M	N		0	Blau	nein	Hamburg
Arbeitgeber Verantwortung für die Gesundheit der Arbeitnehmer einfordern (gesetzliche Regelung)	4	F					0	Blau	nein	Hamburg
Lokal, regional und saisonal; Info und Netzwerke (z.B. Regionalwert AG)	4	B	E	J	K		0	Blau	nein	Hamburg
Urban Gardening fördern; Bio/ regional/ Gemeinschaft	4	E	G	I	J	R	0	Blau	nein	Hamburg
Mehr Kontrolleure für mehr Transparenz	4	C					0	Blau	nein	Hamburg
Ernährung als Unterrichtsfach (Kochen, Gartenarbeit...)	4	B					7	Grün	ja	Hamburg
Vorbilder inszenieren	4	D					1	Grün	ja	Hamburg
Politische Unterstützung der regionalen Landwirtschaft	4	F	G	J			1	Grün	ja	Hamburg
Ernährungsparlament	4	F					1	Grün	ja	Hamburg
Einen Ernährungsausschuss in der Stadtverwaltung etablieren	4	F	R				3	Grün	ja	Hamburg
Kommunales Stadtteilhaus -> Nachhaltigkeitsgedanken in Gruppen erleben, die gemeinsam Kampagnen entwickeln, gestalten, ...	4	D	E	R			2	Grün	ja	Hamburg
Mehr Workshops als Pflichtveranstaltungen	4	B					2	Grün	ja	Hamburg
Mit Hilfe von Edukation Werte vermitteln und das Erreichen von Zielen erleichtern	4	B					3	Grün	ja	Hamburg
Eine politische Partei bilden	4	E	F				1	Grün	nein	Hamburg
Förderung von „Soft skills“ (Organisation, Kommunikation, Präsentation, etc.) damit gesetzte Ziele auch in Angriff genommen und überzeugend umgesetzt werden können	4	B					1	Grün	nein	Hamburg
Erfahrungsmöglichkeiten bieten (WOOF, Hofbesuche, Mitarbeit)	4	B	G				0	Grün	nein	Hamburg
Transparenz und schnelle Vernetzung durch z.B. App	4	C	D				0	Grün	nein	Hamburg
Sensible Lebensphasen (Schwangerschaft etc.) durch Praxis- und Lernerfahrungen begleiten	4	B					0	Grün	nein	Hamburg
Problem: Ungewissheit, nicht ausreichendes Wissen; Lösung: Podiumsdiskussionen, Veranstaltungen wie Unterricht	4	B					0	Grün	nein	Hamburg
Transdisziplinäre Arbeit	4	E					0	Grün	nein	Hamburg
Externe Kosten (z.B. für Nitratbelastung, Testaufwand für Antibiotikaresistenz) ausweiten und als Steuer aufschlagen	4	F					1	Rot	ja	Hamburg
Lokale Handelswege optimieren	4	J					1	Rot	ja	Hamburg
Lobbyismus in Agrar- und Lebensmittelindustrie sehr streng regeln bzw. verbieten	4	F					5	Rot	ja	Hamburg
Belohnung für regionale Produkte	4	J					1	Rot	ja	Hamburg
Bio und Fairtrade fördern!	4	F	I				1	Rot	ja	Hamburg
Korrelation zwischen Fehlernährung und Krankheit veröffentlichen! (Diabetes, Krebs)	4	B					1	Rot	ja	Hamburg
Lügen und Lobbyismus transparent machen	4	C					1	Rot	ja	Hamburg
Umweltstandards erhöhen	4	F					1	Rot	nein	Hamburg
Mehr Transparenz	4	C					1	Rot	nein	Hamburg
Pestizide, Herbizide boykottieren	4	F					1	Rot	nein	Hamburg
Tierschutzstandards erhöhen	4	F					1	Rot	nein	Hamburg
Aktivisten fördern	4	E					1	Rot	nein	Hamburg
Mindestlohn erhöhen	4	F					0	Rot	nein	Hamburg
Staat vor privat	4	F					0	Rot	nein	Hamburg
Preis über Kaufanreize	4	H					0	Rot	nein	Hamburg
Öffentliche Aufträge auf Basis von Qualität	4	B	I				0	Rot	nein	Hamburg
Transparenz fördern	4	C					0	Rot	nein	Hamburg
Biosprit verbieten -> Kein Energiemais mehr!	4	F					0	Rot	nein	Hamburg
Budgets für Schulen und Kitas erhöhen	4	F					0	Rot	nein	Hamburg
Verlogene Werbebotschaften verbieten	4	D	F				0	Rot	nein	Hamburg
Lokalisierung der Nahrungsproduktion	4	G	J				0	Rot	nein	Hamburg
Verbot Grundwasser für Landwirtschaft zu nutzen	4	F	G				0	Rot	nein	Hamburg
Verfremdung von Werbung	4	D					0	Rot	nein	Hamburg
Höhere Steuersätze/ MwSt./ Einkommenssteuer für konventionelle Produkte	4	F					0	Rot	nein	Hamburg
Wahrheitsgemäße Fakten zu Landwirtschaft in der Schulbildung	4	B					0	Rot	nein	Hamburg
Transparente Preispolitik und ehrliche Konkurrenz	4	C	H				0	Rot	nein	Hamburg
Flugpreise erhöhen	4	F					0	Rot	nein	Hamburg
Qualität statt Quantität fördern	4	F	G				0	Rot	nein	Hamburg
Gewinnmaximierung steht nicht vor Naturschutz	4	F					0	Rot	nein	Hamburg
Bio-Zertifikate kostenlos -> über Kunstdünger-/ Pestizidsteuer finanzieren	4	F	I				0	Rot	nein	Hamburg
Freibeträge für Biolandwirtschaft	4	F	I				0	Rot	nein	Hamburg
Subventionen für Bio-Landbau und Nachhaltigkeit	4	F	I				0	Rot	nein	Hamburg
Kleinvereine bilden von Mittelstandunternehmen (gegen Globalisierung)	4	E					0	Rot	nein	Hamburg
Tierschutzvereine und -Initiativen schaffen und zusammenlegen	4	E					0	Rot	nein	Hamburg
Bodenpreise senken	4	F					0	Rot	nein	Hamburg
Diverse Angebote an lokalen Produkten mit Rabatten du Aktionen bewerben	4	A	D	J			0	Rot	nein	Hamburg
GMOs verhindern und Saatdiversität fördern	4	F					0	Rot	nein	Hamburg

## Sheet: Daten_Berlin
Idee	Deduktive Codierung	Induktive Codierung					Punkte	Farbe	Favoritverwendung	Ort
Wo liegt generell das „Problem“ wenn Menschen trotz Bewusstsein nicht danach handeln?	0						0	Gelb	nein	Berlin
Allmende: Überschaubare Sozietäten	0						0	Gelb	nein	Berlin
Neid, Ängste sind problematisch	0						0	Gelb	nein	Berlin
Mehr Natur von Kindergarten an	0						0	Gelb	nein	Berlin
Lässt sich der heutige „Luxus“ mit Nachhaltigkeit vereinbaren?	0						0	Gelb	nein	Berlin
Zwei Wasserkreisläufe im Haushalt	0						2	Orange	ja	Berlin
Spätestens aus der „Not“ heraus?!	0						0	Orange	nein	Berlin
Verpackung als Notwendigkeit?	0						0	Orange	nein	Berlin
Repair-Cafés	0						0	Orange	nein	Berlin
Zeit! Was bedeutet zu wenig Zeit haben?	0						0	Blau	nein	Berlin
Offenheit	0						0	Grün	nein	Berlin
Keine genveränderten Versuche an Menschen	0						0	Rot	nein	Berlin
Vom Ziel her denken: Ernährung als Mittel für Ziel, Gesundheit, Fitness, Genuss, Lernen, (Bewusstseinsbildung, Zertifizierung/ Hinweise)	1	O					0	Grün	nein	Berlin
Mehr Zeit für persönliche Veränderung	2	Q					2	Gelb	ja	Berlin
Salutogenetische Versorgungsplanung	2						1	Gelb	nein	Berlin
Auswirkungen des eigenen Handelns begreiflich machen	2	O					0	Gelb	nein	Berlin
Gründe für unnachhaltiges Verhalten eliminieren/ reduzieren	2						0	Gelb	nein	Berlin
Partizipation i.S. des Bewusstseins: Ich bin Gestalter/in meines Umfelds/ Lebens = Recht-Nahme	2	O					0	Gelb	nein	Berlin
Problem? Muss letzten Endes durch eigenen Willen entstehen	2						0	Gelb	nein	Berlin
Verantwortung erkennen und umsetzen (Handeln aus starkem Bewusstsein)	2	O					0	Orange	nein	Berlin
Wertschätzung der Nahrung bewusst machen und erhöhen	2	O					1	Blau	ja	Berlin
Am Essen sollte nicht gespart werden. Nahrung/Lebensmittel ≠Geldverschwendung	2	H					1	Blau	nein	Berlin
Rituale schaffen	2	P					1	Blau	nein	Berlin
Regionale Produkte bevorzugen / fördern	2	J					0	Blau	nein	Berlin
Pause machen, tief Durchatmen, sich selbstbewusst fühlen, entschleunigen	2	O	Q				0	Blau	nein	Berlin
Essen (Zubereitung) nicht nur als Verlust von Zeit wahrnehmen lernen!	2	N	Q				0	Blau	nein	Berlin
Kompostierung von Haushaltsabfälle auf dem eigenen Balkon	2						0	Blau	nein	Berlin
Vitalpausen/ Umgestaltung der Pausen -> kleinere Pausen + strikte Pauseneinhaltung	2	Q					0	Blau	nein	Berlin
Psychisch/Mentale Bedürfnisse durch geerdeten Konsum (Eigenarbeit, Nahrung/ Ernährung erarbeiten) befriedigender gestalten	2						0	Blau	nein	Berlin
Persönliche Barrieren bewusst machen -> warum setze ich mein Wissen nicht in die Tat um?	2	O					2	Grün	ja	Berlin
Sich andere Menschen suchen und gemeinsam Handeln	2	E					2	Grün	ja	Berlin
Schaffung von Ritualen	2	P					2	Grün	ja	Berlin
Förderung der Geschmackswahrnehmung	2	B	N	O			2	Rot	ja	Berlin
Mit Salz & Zucker sparsamer und bewusster umgehen!	2	M					1	Rot	nein	Berlin
Schon in Schulen etc. durch Kurse (Kochen usw.) eine nachhaltige Ernährung aufzeigen	3	B	M				2	Gelb	ja	Berlin
Koch- & Ernährungskurse an Schulen (langfristig -> Routine & Begeisterung für Kochen)	3	B	M				2	Gelb	ja	Berlin
Warnung vor nicht nachhaltigen Produkten (Warndreieck Nicht BIO!!!)	3	I					1	Gelb	nein	Berlin
Bepreisung von Lebensmitteln angleichen (Fleisch ist konventionell zu billig; Wissen über „Lebens“mittel geht verloren)	3	H					1	Gelb	nein	Berlin
Bio- Döner-Läden öffnen	3	A	I				0	Gelb	nein	Berlin
Schockbilder von Massentierhaltung auf entsprechenden Produkten	3	B	C	D			0	Gelb	nein	Berlin
Bio-Kochkurse in Schulen für Kinder (& Eltern?!)	3	B	I	M			0	Gelb	nein	Berlin
Frühe Gewöhnung an ausgewogene Ernährung	3	B					0	Gelb	nein	Berlin
Kantinen etc. mit nachhaltiger Ernährung ausstatten	3	A					0	Gelb	nein	Berlin
Kosten senken (wie auch immer) für Bio-Produkte	3	H	I				0	Gelb	nein	Berlin
Preisfragen: gesundes Essen für alle erschwinglich	3	H					0	Gelb	nein	Berlin
Bio-Kurse veranstaltet durch die Krankenkasse (Bonusprogramm)	3	B	I				0	Gelb	nein	Berlin
In der Stadt Lebensmittel „verdörflichen“ -> weniger Supermarkt mehr Händler des Vertrauens aus der Umgebung	3	A	J	R			0	Gelb	nein	Berlin
Ausschluss(zonen) von (Quellen) ungesunder Nahrung	3						0	Gelb	nein	Berlin
Verbot von Fake-Foods („E-Nummer Produkte“)	3	F					0	Gelb	nein	Berlin
Gesetzliche Umgestaltung der Ernährungsversorgung im Sinne der Menschenrechte (Zugang, Gleichheit, Gleichwertigkeit, Ausbeutung stoppen,…); Asoziale Marktwirtschaft in die Schranken weisen	3	F					3	Orange	ja	Berlin
Nachhaltige Ernährung als gesellschaftliche Norm einführen z.B. in Filmen o.ä. thematisieren	3	D	E				0	Orange	nein	Berlin
Bio-Diät als Weg zum Top-Body vermarkten	3	D	I				0	Orange	nein	Berlin
Mehr Slow-Food Angebot	3	A					0	Blau	nein	Berlin
Gesündere Kantinen: -lokale Anbieter -nur nachhaltige Produkte	3	A	J				0	Blau	nein	Berlin
Handeln positiv verstärken durch Vorteile für Bio-Ernährung (Preis, gesellschaftliche Vorteile, Krankenkassen günstiger, Steuervorteile USt)	3	H	I				1	Grün	ja	Berlin
Kuschelgruppen einführen, die dich nur mitkuscheln lassen, wen du dich Bio ernährst	3	E	I				1	Grün	nein	Berlin
Gewünschtes bestärken, Unerwünschtes ungefördert lassen (Boni – z.B. weniger Steuern für nachhaltige und gesunde Lebensmittel / Sanktionen – z.B. höhere Steuern auf ungesunde umweltbelastende Lebensmittel)	3	F					0	Grün	nein	Berlin
Realpreise für konventionell erzeugte Nahrung nehmen	3	H					1	Rot	ja	Berlin
Früherer Start der Ernährungslehre, damit richtige Ernährung selbstverständlich wird, z.B. durch Medien	3	B	D				1	Rot	ja	Berlin
Plattform für Landwirte anbieten, um saisonale und regionale Produkte zu fairen Preisen an die Konsumenten zu bringen, z.B. durch Märkte	3	A	G	J	K		2	Rot	ja	Berlin
Gesetzliche Regelung: Pflicht zur Kennzeichnung von Nahrung bzgl. Produktionsweise / Herkunftsweg	3	C	F				2	Rot	ja	Berlin
Informationen zur Herkunft/ Produktion etc. von Nahrung bereitstellen	3	B	C				0	Rot	nein	Berlin
Offensiv werbende Bio-Super-Frischfood- Kette macht an allen Autobahnraststätten etc. auf	3	A	D	I			0	Rot	nein	Berlin
Gemüse/ Obst als Standardlebensmittel (wieder) etablieren	3						0	Rot	nein	Berlin
Studien zur gesunden Ernährung & deren positiver Wirkung fördern und veröffentlichen	3	B	D				0	Rot	nein	Berlin
Angebote von konventionellen Produkten in Supermärkten minimieren/ besonders kennzeichnen	3	A	F				0	Rot	nein	Berlin
Förderung und Unterstützung für regionalen Bio-Anbau vom Saatgut bis Ladenfläche	3	F	G	I	J		0	Rot	nein	Berlin
Preise angleichen, so dass „Wert“ bezahlt wird -> Bsp. Fleischpreis in „konventioneller“ Haltung anziehen	3	H					0	Rot	nein	Berlin
Werbung stärker zu Gunsten von BIO/ Nachhaltigkeit machen & fördern	3	D	I				0	Rot	nein	Berlin
Deutliche Kennzeichnung der Produkte	4	C	F				1	Gelb	ja	Berlin
Herstellung / Herkunft der Produkte auf Verpackung schreiben (wie bei Abschreckfotos auf Zigaretten)	4	B	C	D			1	Gelb	ja	Berlin
Keine Bevormundung (-> stößt ab) sondern Empowerment (z.B. Kampagnen, Top-Down Bestimmung, gesetzliche Regulierung)	4	B	D	E			1	Gelb	ja	Berlin
Internalisierung von Kosten	4	F	H				2	Gelb	ja	Berlin
Werbung regulieren!! (Realitätsbezug, Materialismus & Konsumismus)	4	D	F				1	Gelb	ja	Berlin
GAP Greening statt „Flächensubventionen“	4	F					1	Gelb	nein	Berlin
Öffentliche Werbung steigern	4	D					1	Gelb	nein	Berlin
Regional (gesamt) Produktion fördern – weltweit	4	G	J				1	Gelb	nein	Berlin
Zerstückelung der Warenproduktion stoppen, um Verständnis für Zusammenhänge zu halten.	4	G					1	Gelb	nein	Berlin
Essbare Stadt	4	G	R				1	Gelb	nein	Berlin
Schulunterricht	4	B					0	Gelb	nein	Berlin
Ernährungslehre	4	B					0	Gelb	nein	Berlin
Staatliche (EU und D) Förderung von nachhaltiger Produktion	4	F	G				0	Gelb	nein	Berlin
Förderung (Preis? Was wird derzeit subventioniert und sollte stattdessen…)	4	F	H				0	Gelb	nein	Berlin
Preis der Nahrungsmittel nach Umweltimpact ausrichten	4	H					0	Gelb	nein	Berlin
Gemeinschaft fördern (weg von Ellenbogengesellschaft…)	4	E					0	Gelb	nein	Berlin
Aufklärung	4	B					0	Gelb	nein	Berlin
Preisspanne konventionell - Bio	4	H	I				0	Gelb	nein	Berlin
Kostendifferenz von gesunden/nachhaltigen Produkten minimieren	4	H					0	Gelb	nein	Berlin
Mehr Aufklärungsarbeit über Produkte, Herstellung & Konsequenzen für Tiere / Umwelt (& Alternativen)	4	B					0	Gelb	nein	Berlin
Kennzeichnung konventioneller Produkte	4	C					0	Gelb	nein	Berlin
Infos auf Produkten ggfs. Informationspflicht (Label) -> Nicht nur Zeichen wie „Bio“	4	B	C				0	Gelb	nein	Berlin
Mehr Förderung von Banken für Bio-Start-ups etc.	4	F	I				0	Gelb	nein	Berlin
Allmende: Wissen für alle verfügbar	4	B	E				0	Gelb	nein	Berlin
Preis vs. „Wenig Zeit“	4	H	Q				0	Gelb	nein	Berlin
Es gilt leider inzwischen als „unnormal“ sich sein Essen selbst zuzubereiten	4	M					0	Gelb	nein	Berlin
Preisschild mit „echtem“ Preis -> Gewissensappell	4	B	C	H			0	Gelb	nein	Berlin
Förderung lokaler Märkte	4	A	J				0	Gelb	nein	Berlin
Zu viele Optionen machen Entscheidung schwer -> gesetzliche Angebotsregulierung/ Herkunftsregulierung	4	A	F				0	Gelb	nein	Berlin
Direktverkauf	4	A	G				0	Gelb	nein	Berlin
(Breiteres) Angebot an nachhaltigen Verhaltensoptionen schaffen, z.B. subsidiäre Kreisläufe -> Läden vor Ort müssen regionales, ökologisches Angebot haben	4	A	I	J			0	Gelb	nein	Berlin
Preistransparenz: Anteil Marke/ Qualität	4	C	H				0	Gelb	nein	Berlin
Image von Nachhaltigkeit/ Bio-Produkten	4	D	I				0	Gelb	nein	Berlin
Wie bei „der Weg einer Jeans“ – Der Weg einer Hühnchenbrust…Food Inc./ Made in?	4	B	D				0	Gelb	nein	Berlin
Mehr Vertrauen in & Nachvollziehbarkeit von nachhaltigen Produkten	4	B	C				0	Gelb	nein	Berlin
Instant – Befriedigungskultur in verschiedenen gesellschaftlichen Zusammenhängen hinterfragen	4	P					0	Gelb	nein	Berlin
Begeisterung/ Interesse steigern, vermitteln	4						0	Gelb	nein	Berlin
Massentierhaltungssteuer einführen!	4	F					0	Gelb	nein	Berlin
Zugängliches Angebot für Alle	4	A					0	Gelb	nein	Berlin
Allmende: Sozietät/ soziale Beteiligung und Verantwortung und Wirkung/ erleben vs. Entfremdung aus Kreisläufen	4	B	E				0	Gelb	nein	Berlin
Mehr Aufklärung in Schulen	4	B					0	Gelb	nein	Berlin
(Lokale) Räte entscheiden: - welche Projekte/ Initiativen erhalten (öffentliche) Fördergelder = Andocken an dem, was ist, um Weichen für die Zukunft zu stellen	4	E	F	J			1	Orange	ja	Berlin
Interkulturelle Workshops/ Austauschprograme mit Dritt-Welt-Ländern	4	B	P				1	Orange	ja	Berlin
Herkunft der Produkte. Es sollte nicht nötig sein, immer alles zu kriegen! Saisonalität, Regionalität!	4	A	J	K			4	Orange	ja	Berlin
Sanktionen bei erhöhten Nitrateinträgen	4	F					1	Orange	ja	Berlin
Weg vom Überangebot	4	A					1	Orange	ja	Berlin
Nachhaltigkeit „spürbar“ machen – Preis?	4	H					5	Orange	ja	Berlin
Stopp der Privatisierung	4	F					1	Orange	nein	Berlin
Keine Privatisierung von Quellen	4	F					1	Orange	nein	Berlin
Wer braucht Label/ Siegel, wenn ökologisch/ nachhaltiges Handeln Gesetz/ Vorschrift ist	4	F					0	Orange	nein	Berlin
Nicht saisonale Produktpalette stark minimieren	4	A	K				0	Orange	nein	Berlin
Echte Preise	4	H					0	Orange	nein	Berlin
Mindestanteil von „Blumen-Flächen“ für Bienen	4	F					0	Orange	nein	Berlin
Projektwoche z.B. in Schule, „1 Woche lang leben aus der Natur“ -> Beseitigung Entfremdung	4	B					0	Orange	nein	Berlin
Ist Normierung immer sinnvoll? – Wiedererkennungswert geht verloren, wenn nur nach „Standard-Typ gesucht wird	4	A					0	Orange	nein	Berlin
Ökologische Erziehung ab Kindergarten, Schule; Über mehr TV-Dokumentationen -> wie können möglichst viele erreicht werden?	4	B	D				0	Orange	nein	Berlin
Gesetze zum Schutz des Lebens (Tierrecht/ -gerechtigkeit)	4	F					0	Orange	nein	Berlin
Durch Aufklärungsarbeit schon in Schulen/ Kindergärten auf die Endlichkeit der natürlichen Ressourcen aufmerksam machen -> Perspektivenwechsel	4	B					0	Orange	nein	Berlin
Transferwissen in Schulen fördern, indem in der Vergangenheit nach tragfähigen Verhaltensweisen geschaut wird. (Bsp. W. v. Siemens…)	4	B					0	Orange	nein	Berlin
Händler = Lehrer	4	B					0	Orange	nein	Berlin
Arbeitszeiten wieder reduzieren -> 30 h Woche	4	F					2	Blau	ja	Berlin
„Reste- App“ -> Reste in App anbieten zum Abholen von anderen	4	D					1	Blau	ja	Berlin
Kollektive Rituale zur Wertschätzung von Essen einführen (gemeinsames Kochen, Erntedank-Feste etc.)	4	E	N	O	P		3	Blau	ja	Berlin
Schulkantine durch Schüler betreiben lassen (teils)	4	B					2	Blau	ja	Berlin
Zugang zu Land für Eigenanbau/ Gemeinschaftsanbau	4	G					3	Blau	ja	Berlin
Kochkurse in allen Lebensbereichen anbieten: Schule, Ausbildung, Arbeit	4	B	M				1	Blau	ja	Berlin
Mehr Zeit für Ernährung; pers.: wie viel muss ich arbeiten?; gesellschaftliche Strukturen schaffen für Neubewegung von „Erfolg“ -> Facettenreich	4	Q					4	Blau	ja	Berlin
Essen -> Gemeinsam konsumieren, sich austauschen	4	B	E	N			1	Blau	nein	Berlin
Regionale Produkte & Anbieter mit moderner/ städtischer Welt verknüpfen (Internet / Lieferservice/ „Land“-Shops)	4	A	J	R			0	Blau	nein	Berlin
Runder Tisch; Mitarbeiter involvieren	4	E					0	Blau	nein	Berlin
Bewusstsein bei Arbeitgebern schaffen & deren Unterstützung einholen	4	O					0	Blau	nein	Berlin
Bild des Kreislaufs (Ernährung) in den Köpfen verankern -> Bildung, Werbung, Information (staatliche Aufgabe!)	4	B	D	F			0	Blau	nein	Berlin
Druck auf Lieferanten erhöhen, dass nur nachhaltige Produkte geliefert werden	4	A					0	Blau	nein	Berlin
Z.B. Solidarische Landwirtschaft als Alternative zu kapitalistischen Produktions-/ Eigentums Systemen	4	E	G				0	Blau	nein	Berlin
Direktvermarktung & Bauern-/ Produzenten Märkte (z.B. Handwerk, Bäcker, ...)	4	A	G				0	Blau	nein	Berlin
Küchen zum Kochen in den Unternehmen – eine umsetzbare Möglichkeit?	4	M					0	Blau	nein	Berlin
Austausch/ Netzwerk; Stadt - Land (Kultur, Lebenswelten kennenlernen)	4	E					0	Blau	nein	Berlin
Verantwortung zurückgeben an Konsumenten	4						0	Blau	nein	Berlin
Wertschätzung steigern für das Leben im Jetzt	4	B	O				0	Blau	nein	Berlin
BAD ≠ Easy - Make healthy food accessible	4	A					0	Blau	nein	Berlin
Auf Arbeit: Teams machen abwechselnd Mittagessen für alle! (Arbeitgeber stellen frei dafür)	4	E	M				0	Blau	nein	Berlin
Prinzip der staatlichen Förderung (z.B. EEG) für Selbstversorgerhöfe	4	A	F	G			0	Blau	nein	Berlin
Austausch an Informationen/ Meinungen	4	B					1	Grün	ja	Berlin
Nachhaltigkeit in einer Gruppe (z.B. Familie, Schule, Freunde) als Norm vermitteln -> Vorbilder finden!	4	E					4	Grün	ja	Berlin
Ernährung als soziales Event -> Spaß am Essen, Kochen… Z.B. über Medium Internet	4	D	E	M	N		2	Grün	ja	Berlin
Das Nützliche mit dem Angenehmen verbinden & Rituale schaffen; Gemeinschaft: Einkaufen, Beziehung/ Gespräch/ Austausch mit Händler/ Produzent/ untereinander; Zubereitung & Essen	4	B	E	M	N	P	2	Grün	ja	Berlin
Gemeinschaft	4	E					0	Grün	nein	Berlin
Arbeitszeit verkürzen, lebenslange Bildung / Lebenslanges Lernen fördern, z.B. zu Ernährungs- & Gesundheitsthemen (Lebenslanges Lernen für höhere Lebensqualität)	4	B	F	Q			4	Rot	ja	Berlin
Bedingungsloses Grundeinkommen („Gleiche“ Ausgangslage für Alle, Zeit sinnvoll & nach Begabung & Berufung einsetzen & genießen)	4	F					2	Rot	ja	Berlin
Keine Abholzung von Wäldern für Anbauflächen	4	G					1	Rot	ja	Berlin
Bauernmärkte zur Normalität werden lassen	4	A	G				1	Rot	nein	Berlin
Gesellschaftliches Umdenken erwirken (Politik, Lifestyle…)	4	E					1	Rot	nein	Berlin
Land für die Deckung des Eigenbedarfs der Bevölkerung sichern und erst dann den Rest verkaufen	4	F	G				1	Rot	nein	Berlin
Die Möglichkeit zu Essen zu Hause geben/ ausweiten	4	N					0	Rot	nein	Berlin
Werbung, wie bei Tabak auch, stärker leiten: Exotisches nicht attraktiver	4	D					0	Rot	nein	Berlin
Mehr Flächen pflichtmäßig offen lassen für alle, z.B. auch für Wildblumen	4	F					0	Rot	nein	Berlin
Öffentlicher Diskurs und Anerkennung der Notwendigkeit von Nachhaltigkeit	4	B	E				0	Rot	nein	Berlin
Aufklärung durch Fernsehreportagen	4	B					0	Rot	nein	Berlin
Zeitreichtum - neuer gesellschaftlicher Standard, geringere Wochenarbeitszeit (½ Arbeit/ ½ Geld = Zeit! für die wichtig & unwichtig scheinende Dinge)	4	Q					0	Rot	nein	Berlin
Keine Verschwendung -> Wiederverwertung (höchst mögliche); Ausnahmeklauseln ermöglichen z.B. Gesundheit/ Hygiene vs. Verpackungsmüll & Reste (Rechtliche Haftung aufheben; z.B. Resteverwertung, Verantwortung bei Nutzern; Bsp. Lebensmittel retten)	4	F					0	Rot	nein	Berlin
Siegel für konventionelle Produkte einführen, welches teurer ist als das Biosiegel	4	I					0	Rot	nein	Berlin
Bio-soft-Soap auf arte.tv/ YouTube anbieten	4	D	I				0	Rot	nein	Berlin
Gerade „Neueinsteigern“ aber auch langjährigen Bauern die Vorteile von biologischem Saatgut/ Nachhaltigkeit nahebringen (auch Aufgrund des Ausschöpfen ihrer Quellen)	4	B	G	I			0	Rot	nein	Berlin
Steuern unterschiedlich staffeln: -> Öko-Bauern durch niedrigere Steuern fördern und unterstützen -> konventionelle Bauern müssen extra Steuer entrichten, sodass es unrentabel wird	4	F	G	I			0	Rot	nein	Berlin
Schulische Aufklärung	4	B					0	Rot	nein	Berlin
Lebensmittel nicht zweckentfremden	4						0	Rot	nein	Berlin
Nahrungsmittelpreise auf „gesundem Niveau“ und Menschen aufklären (keine „falschen“ Subventionierungen)	4	F	H				0	Rot	nein	Berlin
Regional erzeugtes Essen wird im Job und anderswo in einem gemütlichen sozial animierenden Event gemeinsam genossen	4	E	J	N			0	Rot	nein	Berlin
Produkte (nachhaltige) subventionieren	4	F					0	Rot	nein	Berlin
Direktvermarktung in der Region	4	A	J				0	Rot	nein	Berlin
Auflistung süchtig machender Stoffe und gesundheitliche Auswirkung auf Verpackungen	4	B	C				0	Rot	nein	Berlin
Fixierung des Konsumenten von Discountern auf kleine, regionale Fachgeschäfte umlenken über gesteigerte Lobbyarbeit	4	A	D	E	J		0	Rot	nein	Berlin
Nicht teure, sondern kreative Erzeugnisse aus recyceltem Material werden in Lifestyle-Magazinen gefeiert	4	D					0	Rot	nein	Berlin
Verbot von Fast Food etc.	4	A	F				0	Rot	nein	Berlin
Ökolandbau über Massenmedien bewerben und zum Konsens machen	4	D	I				0	Rot	nein	Berlin
Nahrung „mit Liebe“ anbauen, damit sich Geschmack entwickelt	4	G					0	Rot	nein	Berlin
Konsumenten die Vielfältigkeit von Lebensmitteln aufzeigen -> Gewohnheiten brechen auch mit regionalen, saisonalen Angeboten	4	A	J	K			0	Rot	nein	Berlin
Zusammenarbeit zwischen Produzent und Konsument	4	E	G				0	Rot	nein	Berlin
Friedenssicherung, sodass kein Hunger / Armut entsteht	4	F					0	Rot	nein	Berlin
Aufklärung/ Bildung zu Nachhaltigkeit	4	B					0	Rot	nein	Berlin
Von klein auf die Wichtigkeit einer ausgewogenen Ernährung anprangern	4	B					0	Rot	nein	Berlin
Aufklärung an Schulen und Arbeitsplatz (Bewusstsein schaffen) und Umsetzung (Kantinen, lange Essenspausen etc.)	4	A	B				0	Rot	nein	Berlin
Auf künstliche, geschmacksverstärkende Zusatzstoffe verzichten/ sie verbieten	4	F					0	Rot	nein	Berlin
Jedem Menschen Raum für Eigenanbau zu Verfügung stellen (oder zumindest günstiger anbieten)	4	G					0	Rot	nein	Berlin
Subventionen für Ökolandbau, konventionellen Anbau besteuern	4	F	I				0	Rot	nein	Berlin

## Sheet: Daten_Münster
Idee	Deduktive Codierung	Induktive Codierung					Punkte	Farbe	Favoritverwendung	Ort
Schocktherapie	0						0	Gelb	nein	Münster
Wie können frühere Ernährungsformen helfen nachhaltiger zu handeln?	0						3	Orange	ja	Münster
Ausgeglichen handeln	0						0	Orange	nein	Münster
Die Konsequenzen anderer tragen	0						0	Orange	nein	Münster
Kann Bio/ nachhaltig massentauglich werden? Ist es dann noch nachhaltig?	0						0	Orange	nein	Münster
Wie kann der Verbraucher sich der Nachhaltigkeit seiner Ernährung bewusster werden? (->zur Verantwortung ziehen?)	0						2	Blau	ja	Münster
Wie lässt sich das gesunde Maß finden?	0						0	Blau	nein	Münster
Mehr Abfall im Singlehaushalt	0						0	Blau	nein	Münster
„Weltoffen“	0						0	Rot	nein	Münster
Lebensmittel (Bio etc.) für unterwegs einpacken	1	A	I				0	Gelb	nein	Münster
Sich selbst Hinterfragen ob „Lusthunger“ oder richtig Hunger!	1	O					1	Blau	nein	Münster
Vorbild sein	2						1	Gelb	nein	Münster
Auf regionale Produkte/ Lebensmittel zurückgreifen	2	J					1	Gelb	nein	Münster
Meinen Alltag besser planen	2	O					0	Gelb	nein	Münster
Sich nicht mit anderen vergleichen	2						0	Gelb	nein	Münster
Emotionseinkäufe vermeiden	2	L					0	Gelb	nein	Münster
Bewusstsein stärken, dass Entscheidungen Auswirkungen auf Zukunft und gegenwärtige Prozesse haben	2	O					1	Orange	ja	Münster
Achtsam einkaufen mit Blick auf Auswirkungen auf andere	2	L	O				1	Orange	nein	Münster
„Lusteinkäufe“ meiden: Brauche ich es wirklich? Wem schade ich?	2	L					1	Orange	nein	Münster
An meine Mitmenschen denken und diese wertschätzen	2	O					0	Orange	nein	Münster
Eigene Bedürfnisse zurückstellen, auch in Eile	2	O	Q				0	Orange	nein	Münster
Mehr auf die Herkunft der Lebensmittel achten	2	C	O				0	Orange	nein	Münster
Sich selber organisieren	2						1	Blau	nein	Münster
Selbstversorgung	2	G					1	Blau	nein	Münster
Bedarfsgerechter Einkauf	2	L					0	Blau	nein	Münster
Eigene Landwirtschaft/ Bio-Produkte	2	G	I				0	Blau	nein	Münster
Wie kann man Mensch mehr zum selber Kochen animieren?	2	M					0	Blau	nein	Münster
Bedarfsgerechter Konsum (auch an Feiertagen)	2	N					0	Blau	nein	Münster
Sich informieren	2	B					0	Blau	nein	Münster
„Selbstversorger“	2	G					0	Blau	nein	Münster
Wieder/ mehr selber kochen!	2	M					0	Blau	nein	Münster
Ein Vorbild sein	2						2	Grün	ja	Münster
Bewusst und ressourcenschonend konsumieren/ leben	2	L	N	O			11	Grün	ja	Münster
Austausch mit anderen Menschen	2	B	E				1	Grün	nein	Münster
Seine Meinung erklären, vertreten aber nicht aufzwingen! -> Gewalt (Blitzsymbol)	2						0	Grün	nein	Münster
Inneren „Schweinehund“ überwinden!	2						0	Grün	nein	Münster
Medien als Infoplattform nutzen!	2	B	D				0	Grün	nein	Münster
Selbstengagement für nachhaltigeren Lebensstil	2						0	Grün	nein	Münster
Verantwortung/ Bewusstsein was Handeln auslöst!	2	O					0	Grün	nein	Münster
Verantwortungsbewusst handeln	2	O					0	Grün	nein	Münster
Freie Entscheidungen als Individuum treffen können	2						0	Rot	nein	Münster
Vorleben von Bio-Konsum in den Medien/ durch Institutionen, vielleicht durch Regierung -> es muss selbstverständlich sein	3	D	F	I			2	Gelb	ja	Münster
Mehr Bio-Angebote in Supermärkte mit akzeptablen Preisen	3	A	H	I			2	Gelb	nein	Münster
Im Supermarkt Kisten zusammenstellen mit unterschiedlichen nachhaltigen Produkten. Um darauf aufmerksam zu machen	3	A	D				0	Gelb	nein	Münster
Mehr Direktkooperationen mit Biobauernhöfen und Verbrauchern	3	A	E	G	I		0	Gelb	nein	Münster
Mehr unverpackte LM anbieten (bes. Gemüse)	3	A	S				0	Gelb	nein	Münster
Kennzeichnung regionaler Produkte im Supermarkt	3	C	J				0	Gelb	nein	Münster
In jedem Supermarkt nur Bio	3	A	I				0	Gelb	nein	Münster
Verbrauchern die Folgen vom konventionellen Essen vor Augen führen	3	B					0	Gelb	nein	Münster
Mehr Bio-Vielfalt in Supermärkten	3	A	I				0	Gelb	nein	Münster
Mehr Bio anbieten	3	A	I				0	Gelb	nein	Münster
Bio-Produkte im Supermarkt besser präsentieren!	3	D	I				0	Gelb	nein	Münster
Aufklären, warum Bio „teurer“ ist!	3	B	H	I			0	Gelb	nein	Münster
Bio braucht ein anderes Image (zurzeit Öko und Hipster)	3	D	I				0	Gelb	nein	Münster
Bessere Verteilung der z.B. Bio-Märkte	3	A	I				0	Gelb	nein	Münster
Versteuerte Verfügbarkeit z.B. auf dem Dorf mehr Einkaufsmöglichkeiten bieten, Bauern können Aushang machen	3	A	G				0	Gelb	nein	Münster
Günstigerer Preis von Bio-Lebensmitteln	3	H	I				0	Gelb	nein	Münster
Attraktivität der Bio-Produkte steigern	3	D	I				0	Gelb	nein	Münster
Tierische Lebensmittel müssen mehr kosten	3	H					0	Orange	nein	Münster
Wird gesunde/ nachhaltige Ernährung leichter zugänglich/ einfacher durch das Internet (z.B. online- Bestellung)	3	A					0	Orange	nein	Münster
Mehr verpackungsfreie Lebensmittelläden	3	A	S				8	Blau	ja	Münster
Arbeitnehmer fördern gesunde Ernährung (Rabatt)	3	H					1	Blau	nein	Münster
Bio überall zu finden	3	A	I				1	Blau	nein	Münster
Lieferdienst Alternativen schaffen; Bio/ Saisonal/ Regional	3	A	I	J	K		0	Blau	nein	Münster
Sehr niedrige Preise für Bio-LM -> Subventionen vom Staat	3	F	H	I			3	Rot	ja	Münster
Gesunde Lebensmittel günstiger anbieten	3	H					1	Rot	nein	Münster
Verbraucher aufklären -> Bedeutung von nachhaltigen Lebensmitteln	3	B					1	Rot	nein	Münster
Werbung und Aufklärung und Infos über „richtige, gesunde“ Ernährung	3	B	D				0	Rot	nein	Münster
Küchen auf der Arbeit anbieten -> so kann in der Pause auch gesund gegessen werden	3	M	N				0	Rot	nein	Münster
Gute transparente Bio-Siegel	3	C	I				0	Rot	nein	Münster
Bio muss günstiger werden!	3	H	I				0	Rot	nein	Münster
Gesunde Ernährung vergünstigen	3	H					0	Rot	nein	Münster
Nachhaltige Lebensmittel im Sonderangebot	3	A	D				0	Rot	nein	Münster
„Bio-Prämien“	4	F	I				3	Gelb	ja	Münster
Geringere Preisdifferenz zwischen Bio & Konventionell	4	H					4	Gelb	ja	Münster
Eigenanbau fördern	4	G					3	Gelb	ja	Münster
Leichtere Zugänglichkeit zum Erzeuger -> Höfe finden und besuchen können	4	A	G				3	Gelb	ja	Münster
„Ampelsystem“	4	B					3	Gelb	ja	Münster
Bildung in Schulen/ Kitas über Anbau und Herkunft	4	B					3	Gelb	ja	Münster
Staatliche Unterstützung	4	F					5	Gelb	ja	Münster
Weniger Verpackungen, ökologisch abbaubare Verpackungen entwickeln und auch verwenden im großen Stil -> Die Masse wird höhere Preise ausgleichen	4	S					2	Gelb	nein	Münster
Mehr Projekte wie „Urban Gardening“ oder „Essbare Stadt“	4	G	R				2	Gelb	nein	Münster
Verpackungsmüll reduzieren/ abbaubar gestalten	4	S					2	Gelb	nein	Münster
Angebot ändern	4	A					1	Gelb	nein	Münster
Aufklärung nicht nur in Deutschland	4	B					1	Gelb	nein	Münster
Bio-Einkauf zum Erlebnis machen	4	I	L				1	Gelb	nein	Münster
Leichtere Verfügbarkeit -> so einfach wie der Einkauf konventioneller Lebensmittel	4	A					0	Gelb	nein	Münster
Fertig zusammengestellte Boxen, ähnlich wie „Fresh-Box“	4	A					0	Gelb	nein	Münster
Supermärkte, in denen die Ernährungsform „integriert“ ist -> z.B. direkt passende Mengen in den Verpackungen	4	A	S				0	Gelb	nein	Münster
Größere Produktpalette -> Vergleichbare Auswahl an Produkten wie konventionell Produziertes	4	A					0	Gelb	nein	Münster
Bei Portionsgrößen (g) bspw. ein „Bild“ wieviel das etwa in der Realität ist -> nicht immer wiegen müssen, sondern „Augenmaß“	4	B					0	Gelb	nein	Münster
Im Einkaufsmarkt auf alternative kreative Gestaltungs-/ Transport- und Verarbeitungsideen aufmerksam machen	4	A	C				0	Gelb	nein	Münster
Größere Transparenz zur Preiszusammensetzung/ -gestaltung von Bio-LM	4	C	H	I			0	Gelb	nein	Münster
Zuckersteuer	4	F					0	Gelb	nein	Münster
„Tante Emma Läden“ nur regionale, saisonale, verpackungsarme Produkte	4	A	J	K	S		0	Gelb	nein	Münster
Keine eingepackten Bio-Lebensmitteln mehr (Obst/ Gemüse)	4	I	S				0	Gelb	nein	Münster
Weniger Subventionen für Tierhaltungsbetriebe	4	F					0	Gelb	nein	Münster
Auch verarbeitete Lebensmittel in Bio-Qualität -> Lebensmittelwirtschaft	4	I					0	Gelb	nein	Münster
Grundsätzlich Obst und Gemüse mit Rezeptzetteln verkaufen	4	A	B				0	Gelb	nein	Münster
Food-Sharing	4	A	E				0	Gelb	nein	Münster
Wege der Bio-Lebensmittel erkennbar (wie, was, wo, woher…)	4	B	C	I			0	Gelb	nein	Münster
Mehr Aufklärung (v.a. was ist schlecht an konventionell)	4	B					0	Gelb	nein	Münster
Lebensmittel müssten günstiger angeboten werden	4	H					0	Gelb	nein	Münster
Emotionalere Denkweisen	4						0	Gelb	nein	Münster
Möglichkeiten Informationen	4	B					0	Gelb	nein	Münster
Übersichtliche Kennzeichnung	4	B	C				0	Gelb	nein	Münster
Bessere Kennzeichnung der Lebensmittel	4	B	C				0	Gelb	nein	Münster
Mehr Infos über Herkunft,… LM	4	B	C				0	Gelb	nein	Münster
Bessere Verbraucheraufklärung	4	B					0	Gelb	nein	Münster
Präsentheit	4	A	D				0	Gelb	nein	Münster
Aufklärung	4	B					0	Gelb	nein	Münster
Mehr Aufklärung	4	B					0	Gelb	nein	Münster
Weniger weiter verarbeitete Produkte	4	A					0	Gelb	nein	Münster
To-go Angebote außerhalb von Biomärkten	4	A	I				0	Gelb	nein	Münster
„einfachere“ Bio-Lebensmittel als dieses viele „Dinkel- Chia- Tofu Smoothie“-Zeug	4	A					0	Gelb	nein	Münster
Infos über die Lage von Hofläden	4	A	B				0	Gelb	nein	Münster
100 % Verwertung	4						7	Orange	ja	Münster
Mehr Aufklärung schon in Schulen	4	B					7	Orange	ja	Münster
Gibt es wirklich gute Alternativen (lecker, einfach, günstig, genug) zu convenience Lebensmitteln?	4	A					2	Orange	ja	Münster
Bio Produkte ohne Verpackung	4	I	S				4	Orange	ja	Münster
Tierrechte verschärfen	4	F					4	Orange	ja	Münster
Bioeinkauf modernisieren	4	A	I				1	Orange	ja	Münster
Nur noch erneuerbare Energien	4	F					1	Orange	nein	Münster
Mehr Transparenz -> Inhaltsstoffe, Herkunft, ...	4	C					0	Orange	nein	Münster
Wie kann man den Teufelskreis von großer Nachfrage und Massetierhaltung unterbrechen	4						0	Orange	nein	Münster
Pluspunktesystem	4						0	Orange	nein	Münster
Aufklärung & Unterstützung	4	B					0	Orange	nein	Münster
Gemeinschaftliches Handeln	4	E					0	Orange	nein	Münster
Umweltschutz	4						0	Orange	nein	Münster
Bilder von Massentierhaltung auf der Verpackung	4	B	C	D			0	Orange	nein	Münster
Wie macht man der Gesamtgesellschaft (gerader der Jugend) bewusst, dass der Mensch ohne die Natur Garnichts herstellen kann	4	B					0	Orange	nein	Münster
Sensibilisierendes Bildungsniveau	4	B					0	Orange	nein	Münster
Online Bio-Einkauf	4	A	I				0	Orange	nein	Münster
Informationen digitalisieren	4	B	D				0	Orange	nein	Münster
Technologie im Supermarkt	4						0	Orange	nein	Münster
Demographischen Wandel beachten	4	E					0	Orange	nein	Münster
Keine Informationsflut!	4	B	D				0	Orange	nein	Münster
Scannen für mehr Information	4	B					0	Orange	nein	Münster
Transparenz erhöhen	4	C					0	Orange	nein	Münster
Disparitäten vermeiden durch Aufklärung	4	B					0	Orange	nein	Münster
Nachkriegsgeneration „Wertschätzung der Lebensmittel“	4	E	O				0	Orange	nein	Münster
„Früher war mehr Lametta“ - Eigenversorgung/ keine Reste	4	G					0	Orange	nein	Münster
Natur oder Gewächshäuser? Natürliche/ künstliche Lebensmittel	4	G					0	Orange	nein	Münster
Hilfe zur Selbsthilfe	4	E					0	Orange	nein	Münster
Respektvoller Umgang mit Ressourcen	4	O					0	Orange	nein	Münster
Urban Gardening	4	G	R				3	Blau	ja	Münster
Wie kann man Produktions- und Handelswege für den Verbraucher durchsichtiger gestalten (z.B. in Restaurants)	4	B	C	D			2	Blau	ja	Münster
Kurze Transportwege	4						2	Blau	ja	Münster
Kleinere Verpackungen (nachhaltig) für Singlehaushalte	4	S					3	Blau	ja	Münster
Verkauf vom Hof, ohne viele Prozessschritte	4	A	G				9	Blau	ja	Münster
Bio-Fertigprodukte und Bio-to go	4	A	I				1	Blau	ja	Münster
Nachhaltiger Lieferservice	4	A					0	Blau	nein	Münster
Toleranz von anderen Ernährungsformen	4	E					0	Blau	nein	Münster
Weitergabe von Infos/ Werten	4	B					0	Blau	nein	Münster
Mehr Bio in den Alltag einführen	4	A					0	Blau	nein	Münster
Jeden beim Kochen einbeziehen	4	E	M				0	Blau	nein	Münster
Überfluss vermeiden	4	A					0	Blau	nein	Münster
Transparenz	4	C					0	Blau	nein	Münster
Verschiedene Produktionswege	4	G					0	Blau	nein	Münster
Wie können Fast-Food-Unternehmen nachhaltiger werden?	4	A					0	Blau	nein	Münster
Kompromisse im Mehrgenerationenhaushalt	4	E					0	Blau	nein	Münster
Aufklärung und Bildung	4	B					8	Grün	ja	Münster
Verträge/ Konsequenzen	4	B					4	Grün	ja	Münster
Austausch (Rezepte, Infos, Zutaten, Erfahrungen)	4	B					1	Grün	ja	Münster
Food Sharing	4	A	E				3	Grün	ja	Münster
Biologischen Anbau erweitern und subventionieren	4	F	G	I			4	Grün	ja	Münster
Gemeinschaftsgefühl aufbauen/ erhalten -> Nachbarschaftshilfe	4	E					1	Grün	ja	Münster
Umsichtig Leben, sodass eine „Rote Liste“ nicht nötig ist (Artenschutz)	4	O					1	Grün	nein	Münster
Austausch von Wissen/ Erfahrungen/ Konsumgüter	4	B	E				0	Grün	nein	Münster
Aufklärung / Umsetzung von Infos & Weitergabe	4	B					0	Grün	nein	Münster
Wie kann man das Bewusstsein für die Ressourcenknappheit (Endlichkeit der Erde) schaffen?	4	O					0	Grün	nein	Münster
App zum Punkte sammeln für den richtigen Einkauf (bio)	4	D	I				0	Grün	nein	Münster
Zusammen bio kochen und essen	4	E	I	M	N		0	Grün	nein	Münster
Gemeinsame Durchsetzung (Familie)	4	E					0	Grün	nein	Münster
Aufklärungsaktionen z.B. in Zeitungen -> regelmäßig	4	B	D				0	Grün	nein	Münster
Wie kann man Vorurteile in der Gesellschaft durch Aufklärung beseitigen?	4	B	E				0	Grün	nein	Münster
Preis-Leistungs-Verhältnis	4	H					0	Grün	nein	Münster
Unterstützung im häuslichen Umfeld (z.B. Partner/ Beziehung)	4	E					0	Grün	nein	Münster
Wie kann man nachhaltige Verpackungsmöglichkeiten etablieren?	4	S					0	Grün	nein	Münster
Tauschen und Teilen von nachhaltigen Lebensmitteln	4	A	E				0	Grün	nein	Münster
Anlaufstellen für Hilfesuchende	4	E					0	Grün	nein	Münster
Anlaufstelle/ Homepage/ Telefonnummer	4	B	D	E			0	Grün	nein	Münster
Im Studium lernen nachhaltig zu Handeln	4	B					0	Grün	nein	Münster
Regionalen Einkauf fördern (Hofläden & Co)	4	J	L				4	Rot	ja	Münster
Bio-Anbau als einzige Lösung für die Welternährung	4	G	I				5	Rot	ja	Münster
Ressourcen nutzen	4						2	Rot	ja	Münster
Menschen bilden	4	B					2	Rot	ja	Münster
Aufklärung in Schulen	4	B					3	Rot	ja	Münster
Artgerechte Tierhaltung	4	G					3	Rot	ja	Münster
Achtsamkeit schulen	4	O					2	Rot	ja	Münster
Ausreichende Beleuchtung, keine Manipulation durch z.B. Medikamente/ Drogen	4	G					2	Rot	nein	Münster
Ausreichende finanzielle Mittel zur Verfügung stellen	4	F					2	Rot	nein	Münster
Unterstützung der Bio-Bauern	4	G	I				1	Rot	nein	Münster
Regionaler/ Saisonaler Anbau	4	G	J	K			1	Rot	nein	Münster
Ehrliche Produkte, vertrauenswürdige/ zuverlässige Labels	4	C					1	Rot	nein	Münster
Strafen für Bauern, wenn sie Pestizide und ähnliches einsetzen	4	F	G				1	Rot	nein	Münster
Bonuspunkte bei gesunder, nachhaltiger Ernährung	4	F					1	Rot	nein	Münster
Innovationsbonus für Unternehmen	4	F					1	Rot	nein	Münster
Auflagen für bestimmen Anbau (Limitationen)	4	F	G				0	Rot	nein	Münster
Freie Auswahl an Lebensmitteln	4	A					0	Rot	nein	Münster
Gezielte Auswahl im Supermarkt	4	A					0	Rot	nein	Münster
Keine Gentechnik	4	F	G				0	Rot	nein	Münster
Ausgewogene Ernährung! -> somit effektive Abnehmpille gar nicht nötig!	4						0	Rot	nein	Münster
Keine Großmärkte, Viele Bio-Läden	4	A	I				0	Rot	nein	Münster
Förderungen von verschiedenen Vereinen	4	E					0	Rot	nein	Münster
Biologische Produktvielfalt erweitern	4	A	I				0	Rot	nein	Münster
Große Auswahl an Produkten	4	A					0	Rot	nein	Münster
Bilder vom guten Öko-Landbau abbilden	4	B	D	I			0	Rot	nein	Münster
Erreichbarkeit/ Verfügbarkeit verbessern	4	A					0	Rot	nein	Münster
Überall Bio-Angebote	4	A	I				0	Rot	nein	Münster
Infektionsschutz erhöhen	4	F					0	Rot	nein	Münster
Nicht industriell gefertigte LM -> unverarbeitet z.B.	4	A					0	Rot	nein	Münster
Kein Einsatz mehr von synthetischen Düngemitteln	4	G					0	Rot	nein	Münster
Bio-Angebote an jeder Ecke	4	A	I				0	Rot	nein	Münster
Schärfere Produktions- & Qualitätskontrollen	4	F					0	Rot	nein	Münster
Böden schonend behandeln (wenig Dünger)	4	G					0	Rot	nein	Münster
Weiterbildung	4	B					0	Rot	nein	Münster
Vertrauen zu den Produzenten	4	E	G				0	Rot	nein	Münster
Gleichheit von Menschen/ Gesellschaften	4	E					0	Rot	nein	Münster
Einheitliche/ Standardisierte Kontrolle	4	F					0	Rot	nein	Münster
Gute Kommunikation weltweit	4	B					0	Rot	nein	Münster
Biomärkte fördern (subventionieren)	4	A	F	I			0	Rot	nein	Münster
Unterstützung bei Selbstanbau z.B. vom Staat -> Landflächen zur Verfügung stellen	4	F	G				0	Rot	nein	Münster
Mehr Unterstützung vom Staat	4	F					0	Rot	nein	Münster
Keine Verwendung von Pestiziden/ Antibiotika	4	G					0	Rot	nein	Münster
Keine Hormone bei Tierhaltung	4	G					0	Rot	nein	Münster
Kurze Produktions- und Transportwege	4	G					0	Rot	nein	Münster
Pillen, die zur Ergänzung der Ernährung dienen	4						0	Rot	nein	Münster
Freie Entscheidungen ermöglichen/ zulassen	4	E					0	Rot	nein	Münster
Verbreitung von Bio-Märkten und co.	4	A	I				0	Rot	nein	Münster
Menschen in ihrem Wissen und ihren Werten bestätigen	4	B					0	Rot	nein	Münster
Ökobauern unterstützen	4	G	I				0	Rot	nein	Münster
Herkunft auf die Lebensmittel drucken	4	C					0	Rot	nein	Münster

## Sheet: Daten_Freiburg
Idee	Deduktive Codierung	Induktive Codierung					Punkte	Farbe	Favoritverwendung	Ort
Sind die Werte „falsch“? Überhöht?	0						0	Gelb	nein	Freiburg
Welche Handlungsmöglichkeiten bestehen? Wie lassen sie sich erweitern?	0						0	Gelb	nein	Freiburg
Ist der Lückenschluss die Lösung?	0						0	Gelb	nein	Freiburg
Wissen/Werte- Handeln-Lücke; Ziel: Vorteil Vorstellung	0						0	Gelb	nein	Freiburg
Was gibt es vor Ort?	0						0	Blau	nein	Freiburg
Radikale Veränderungen	0						2	Rot	ja	Freiburg
Kapitalismus zerschlagen!	0						0	Rot	nein	Freiburg
(Dunkle) Mächte vernichten (Episode VIII)	0						0	Rot	nein	Freiburg
Oft ist es eine Zeitfrage. Selbst wenn Wissen und Werte über gesunde und nachhaltige Ernährung vorhanden sind, ist es schwer in den Alltag einer großen Familie einzubringen und umzusetzen -> mehr Zeit für Ernährung	1	Q					0	Gelb	nein	Freiburg
Mehr Zeit für Ernährung einzubringen und umzusetzen	1	Q					0	Gelb	nein	Freiburg
Zeit nehmen für Vorbereitung/ Beschaffung des Essens	1	L	M	Q			0	Blau	nein	Freiburg
Zeit für Ernährung, Anbauerfahrungen, Zubereitung geben	1	B	M	Q			1	Rot	nein	Freiburg
Neue Essgewohnheiten entwickeln	1	N					0	Rot	nein	Freiburg
Mehr Zeit für Nahrungszunahme: bewusstes Essen. Essen schmecken, erspüren	1	N	O	Q			0	Rot	nein	Freiburg
Ernährung nicht isoliert betrachten	2	B					1	Gelb	ja	Freiburg
Was man liebt, will man schützen	2						0	Gelb	nein	Freiburg
Schaffen von Genuss-/ Erfüllungsalternativen zum Konsum -> Vermeidung von Frustkäufen	2	L					1	Orange	ja	Freiburg
Bei sich selbst anfangen -> eigenes Umfeld ->...	2						4	Orange	ja	Freiburg
Meditation/ innere Ausrichtung stärken -> dadurch Ausstrahlung erhöhen und eigene Kraft stärken	2						1	Orange	nein	Freiburg
Suffizienz Erfahrungen machen. Was brauche ich wirklich? Und was steht hinter welchem Produkt	2	B					0	Orange	nein	Freiburg
Veränderungen brauchen Zeit; neue Handlungsstrategien entstehen nicht von heute auf morgen -> Zeit lassen, kein Zwang	2	Q					0	Orange	nein	Freiburg
Die Rolle der Lebensmittel im Zusammenhang mit unserer Lebensart betrachten	2	B	O				0	Orange	nein	Freiburg
Weniger kaufen = weniger wegwerfen? -> „Müllgrenze“	2	L					0	Orange	nein	Freiburg
Spirituelle Ansätze ausprobieren (über freilassend - nicht manipulativ)	2						0	Orange	nein	Freiburg
Mehr rausgehen (vor allem mit Kindern)	2						0	Orange	nein	Freiburg
Vielfalt entdecken -> Neues wertschätzen	2	B	O				0	Blau	nein	Freiburg
Bewusstsein für „Man ist was man isst“	2	O					0	Grün	nein	Freiburg
Eigenes Unterrichtsfach an Schulen „Nachhaltige Ernährung“	3	B					2	Gelb	ja	Freiburg
Allgemeinwissen und Erfahrungen über Lebensmittel schaffen in Schulen, Küchen, Gesundheitszentren, Land und Stadt, z.B. Ernährungsbildung als „muss“	3	B					3	Gelb	ja	Freiburg
Ernährungsversorgung anders organisieren als über Supermarkt, z.B. über Food Coops	3	A	E				1	Gelb	ja	Freiburg
Label für konventionelle Produkte, Bioprodukte als Standard	3	I					0	Gelb	nein	Freiburg
„Nachhaltiges“ Kochen mehr in den Alltag bringen (Kochbücher, -kurse, …)	3	M					0	Gelb	nein	Freiburg
Alltagstauglichkeit von nachhaltigem Konsum/ Ernährung -> Kochkurse, etc.	3	M					0	Gelb	nein	Freiburg
Nachhaltige Ernährung muss Trend/ cool/ hip werden	3	D					0	Gelb	nein	Freiburg
Mehr nachhaltiges Angebot in konventionellen Supermärkten	3	A					0	Gelb	nein	Freiburg
Besteuerung von nicht-nachhaltigen Produkten (Preiswandel, Erschwinglichkeit von Bio- Produkten)	3	F	H	I			0	Gelb	nein	Freiburg
Bildung für Nachhaltige Ernährungsformen (Schule, außerschulisch, …)	3	B					0	Gelb	nein	Freiburg
Plattformen schaffen für Austausch (auch interkulturell) „Wie gestalte ich meine Ernährung“	3	B	E	P			0	Blau	nein	Freiburg
Infrastruktur für Nachhaltige Strategien schaffen (z.B. für Nachbarschaftskooperation) Rechtliche Vereinfachungen z.B. für (Food)Sharingpoints; Einkaufsgemeinschaften, Stelle/ Arbeitsplatz schaffen, der die Infrastruktur pflegt, Arbeiten ausführt	3	E	F				5	Grün	ja	Freiburg
Zugang für alle zu qualitativ hochwertigen Lebensmitteln -> Auswahl/ Optionen/ Wahlfreiheit	3	A					1	Rot	nein	Freiburg
Bewusstsein für gesunde und nachhaltige Ernährung stärken -> Ernährungsbildung, Wertewandel, mehr Zeit für Nahrung	3	B	O				0	Rot	nein	Freiburg
Der Bevölkerung finanzielle Mittel für nachhaltige Lebensmittel zur Verfügung stellen	3	F					0	Rot	nein	Freiburg
Lebensmittelproduktion erfahrbarer machen	4	G					2	Gelb	ja	Freiburg
Informationen auf/ an Produkten: CO2/ Gemeinwohl/ Bodenfruchtbarkeit etc.	4	B	C				2	Gelb	ja	Freiburg
Vernetzung zwischen Ökolandwirten und Konsumenten ausbauen	4	E	G	I			3	Gelb	ja	Freiburg
„Handlungspädagogik“ in Landwirtschaft/ Gartenbau für alle Altersstrukturen	4	B					2	Gelb	ja	Freiburg
Steuern für Bodenabbau und Umweltschädigungen in Landwirtschaft und Boni für Boden-Aufbau, Landwirtschafts-Regeneration	4	F	G				1	Gelb	nein	Freiburg
Eltern, Lehrer/innen, Politik, Unternehmer müssen sich vorbildlich verhalten	4	B	E	F			1	Gelb	nein	Freiburg
Preisdruck für Produzent/innen angehen ( sollten auch von biologischer Produktion leben können ohne viele Schwierigkeiten)	4	G	H				1	Gelb	nein	Freiburg
Viele kleine überschaubare Projekte initiieren und unterstützen: Think global, act local	4	E					1	Gelb	nein	Freiburg
Food-Kooperativen	4	A	E				1	Gelb	nein	Freiburg
Neuen Trend „entstehen“ lassen: „Real Green“	4	D					1	Gelb	nein	Freiburg
Emotionale Bindung zur Natur fördern -> Bildungsbereich	4	B					1	Gelb	nein	Freiburg
Politische Rahmenbedingungen ändern. „Besserstellung“ von nachhaltigen Produkten/ Sanktionen für nicht nachhaltige Produkte. „Preise anpassen“	4	F					1	Gelb	nein	Freiburg
Feste Preise für Zukunftsfähige Lebensmittelerzeugung	4	G	H				1	Gelb	nein	Freiburg
Kinder erreichen Eltern und Großeltern	4	B	E				0	Gelb	nein	Freiburg
In Kindergärten: für Natur begeistern	4	B					0	Gelb	nein	Freiburg
In Schulunterricht: Lebensgrundlagen	4	B					0	Gelb	nein	Freiburg
Erlebnisbauernhof	4	B	G				0	Gelb	nein	Freiburg
Produktionsteile in die Stadt bringen z.B. Kulturacker	4	G	R				0	Gelb	nein	Freiburg
Stärkung von Landwirten von allen gesellschaftlichen Bereichen (Staat, Konsument, Wirtschaft) für biologische Produktion	4	E	F	G	I		0	Gelb	nein	Freiburg
Wertewandel: Landwirtschaft für das Mittel zum Leben verstehen anstatt wie Industriesektor	4	G					0	Gelb	nein	Freiburg
Kommunikation und Verständnis	4	E					0	Gelb	nein	Freiburg
Prekäre Lebenssituationen verringern	4	F					0	Gelb	nein	Freiburg
Hilfestellungen bei der Komplexität von Konsumentscheidungen aus unabhängigen Quellen (!) entwickeln, präsenter/ attraktiver machen	4	B					0	Gelb	nein	Freiburg
Möglichkeit entwickeln den CO2-Abdruck/ sozialen Impact von Produkten zu beziffern und diesen Wert dem Produkt zuordnen -> Transparenz	4	B	C				0	Gelb	nein	Freiburg
Ein Mix aus Steuerungselementen anwenden: Von Labeling über klare Vorgaben von Entscheidungsträger über partizipiere Landwirtschaft -> schafft Infrastruktur für ein erfolgreiches Umsetzen des Wissens/ Werte oder ggf. sogar ohne entsprechendes Wissen/ Bewusstsein	4	E	F	G			0	Gelb	nein	Freiburg
Verschiedene Gruppen ansprechen! Verbände, Gewerkschaften, Firmen und auf deren Bedürfnisse eingehen! (Ernst nehmen!!)	4	E					0	Gelb	nein	Freiburg
Neue Medien nutzen	4	D					0	Gelb	nein	Freiburg
Bildung: positive Erfahrungen schaffen, um Interesse und Wertschätzung zu wecken. Z.B. Projekte in Schulen, außerschulischen Lernorten	4	B	O				0	Gelb	nein	Freiburg
Kombination aus Kultur, Technik, nachhaltiger Lebensmittelproduktion	4	P					0	Gelb	nein	Freiburg
Mehr Transparenz über Inhaltstoffe von Waren – verständlichere Deklarierung	4	C					0	Gelb	nein	Freiburg
Finanzielle Sicherheit für Geringverdiener schaffen -> „Preis entscheidet“	4	F	H				0	Gelb	nein	Freiburg
Menschen mehr in Produktions-, Recycling- und Entsorgungskette einbinden - > Bezug zur Nahrung, Verantwortung für Handlung	4	E					0	Gelb	nein	Freiburg
Verbindliche Abnahme von Ware (z.B. Biokiste) (Weniger Müll, weniger Überangebot, direkt „gute“ Ware, Entscheidung wird nicht jedes Mal neu getroffen	4	A	I				0	Gelb	nein	Freiburg
Noch mehr „Kontaktflächen“ für Bewusstseinsbildung schaffen	4	O					0	Gelb	nein	Freiburg
Initiativen, die es bereits gibt vernetzen (für Austausch, Ideen, Kommunikation, Synergien)	4	E					0	Gelb	nein	Freiburg
Öffentliche/ halböffentliche Nahrungsbereitsteller stärker in Verantwortung nehmen, z.B. Mensen, Kantinen, etc.	4	A					0	Gelb	nein	Freiburg
Macht der Werbung -> für positive/ nachhaltige Produkte nutzen	4	D					0	Gelb	nein	Freiburg
Gesetzgebung!	4	F					0	Gelb	nein	Freiburg
Entsprechende Gestaltung von Subventionen (Förderung von kleinbäuerlichem Bio- Anbau mit regionaler Vermarktung)	4	F	G	I	J		0	Gelb	nein	Freiburg
Thematisch viel stärker in die Schulen bringen, vor allem über „praktische“ Erfahrungen/ Erlebnisse	4	B					0	Gelb	nein	Freiburg
Kindern den „Wert“ von Natur nahebringen -> schützenswert	4	B					0	Gelb	nein	Freiburg
Weniger Angebot	4	A					0	Gelb	nein	Freiburg
Natürliche N-Reserven nutzbar machen, N- Düngereinsatz reduzieren (Methan, Lachgas)	4	G					0	Gelb	nein	Freiburg
Erholungsparks, Natur mit Gruppenführungsangeboten	4	B					0	Gelb	nein	Freiburg
Bodenschutz!!! Auch von Bodenleben!	4	G					0	Gelb	nein	Freiburg
Verpflichtung aller Landwirte zur Pflanzung von 5-10 % Bäume pro Hektar	4	G					0	Gelb	nein	Freiburg
Staatlich finanzielle Wertschätzung für Nachbarschaftshilfe (Verdienstausfall)	4	F	E				0	Gelb	nein	Freiburg
Mehr Anerkennung und Lohn für soziale Berufe und Landwirtschaft	4	F	E				0	Gelb	nein	Freiburg
Obergrenze Hektar für Landwirtschaftliche Betriebe (Überproduktion und Preisverfall)	4	F	G				0	Gelb	nein	Freiburg
Ende der Flächensubvention (Profit nur für Großfarmen)	4	F	G				0	Gelb	nein	Freiburg
Kooperation beider Seiten für Lebensmittelanbau und Naturschutz	4	E	G				0	Gelb	nein	Freiburg
Solidarischer Landwirtschaftsformen fördern und mitmachen	4	E	G				3	Orange	ja	Freiburg
Mehr Schulbesuche in landwirtschaftlichen Betrieben	4	B	G				1	Orange	ja	Freiburg
Gemeinschaft stärken (Verantwortung füreinander, Stärkung von Werten, Zugehörigkeitsgefühlen)	4	E					3	Orange	ja	Freiburg
Verbot Ausfuhr (Export) billiger Lebensmittel(-reste) die Kleinbauern in Dritte-Welt-Ländern Existenz nehmen	4	F	G				3	Orange	ja	Freiburg
Positiv-„Schlagzeilen“ über bereits Erreichtes. Motivieren!	4	D					4	Orange	ja	Freiburg
Verpackungsfreie Läden	4	A	S				1	Orange	ja	Freiburg
Transport von Kleinbauern an den Konsumenten organisieren	4	A	G	E			1	Orange	nein	Freiburg
Poesie und Kunst als Vermittler	4	B	D				1	Orange	nein	Freiburg
Kochrezepte entwickeln, die möglichst wenig Verpackung/ Zutaten etc. verbrauchen	4	B	M	S			1	Orange	nein	Freiburg
Mehr staatliche Gelder für Pflanzenschutzmittel-unabhängige Forschung	4	F					0	Orange	nein	Freiburg
Ursachen beheben, statt Schaderreger bekämpfen!	4	G					0	Orange	nein	Freiburg
Förderung Buchen-Mischwälder für stabile, saubere Trinkwasserbestände	4	F					0	Orange	nein	Freiburg
Nachhaltigkeitsbegriff definieren und durch Kriterien messbar machen (Greenwashing vermeiden)	4	B	F				0	Orange	nein	Freiburg
Kleine Veränderungen wertschätzen!	4	O					0	Orange	nein	Freiburg
Vorträge/ Workshops „Was sind Grundlagen, die wir wirklich brauchen?“	4	B					0	Orange	nein	Freiburg
Bessere pädagogische Ausbildung für Lehrer (gutes Miteinander der Schüler)	4	B	E				0	Orange	nein	Freiburg
Führerschein (PKW) – Verlust bei Nichtteilnahme regelmäßiger Klimavorträge (alle 3-4 Jahre)	4	F	B				0	Orange	nein	Freiburg
Gemeinschaftliches Kochen organisieren, bei dem der Wert guter Lebensmittel geschätzt wird	4	E	M				0	Orange	nein	Freiburg
Wertschätzung	4	O					0	Orange	nein	Freiburg
Faire Gesetzeslage: z.B. „Hühnerkuscheln“ verboten. Kleinbäuerlich/ Bio-Strukturen fördern	4	F	G	I			0	Orange	nein	Freiburg
Verpackungsfreie Läden mit regionalen und Bio-Produkten	4	A	I	J	S		0	Orange	nein	Freiburg
Meditation in Schule und Beruf	4	O					0	Orange	nein	Freiburg
Schon getestete Strategien evaluieren aus Vergangenheit lernen und sich weiterentwickeln	4	B					0	Orange	nein	Freiburg
Die Gesetzmäßigkeit der Natur ernst nehmen	4	O					0	Orange	nein	Freiburg
Naturgewalt als Energieträger nutzen	4						0	Orange	nein	Freiburg
Sorgsam in Gemeinschaft aus Lebenserfahrung gesunde Lebenswege gestalten	4	B	E				0	Orange	nein	Freiburg
Wir entscheiden wo und wie es in die Zukunft geht!	4	E					0	Orange	nein	Freiburg
Gerechtere Verteilung von Ressourcen durch Beschränkung und Verfügbarmachen	4	A	E				0	Orange	nein	Freiburg
Angepasste Nutzung der „sozialen Medien“	4	D					0	Orange	nein	Freiburg
Viele Tropfen ergeben einen Ozean -> gemeinsam sind wir stark	4	E					0	Orange	nein	Freiburg
Gemeinwohlbilanz	4	E					0	Orange	nein	Freiburg
Information über soziale Netzwerke, Apps, andere Medien	4	B	D				0	Orange	nein	Freiburg
Solidarische Landwirtschaft	4	E	G				0	Orange	nein	Freiburg
Grenzen wahrnehmen -> Veränderungen im Klima	4	O					0	Orange	nein	Freiburg
Back to the roots -> Subsistenz	4						0	Orange	nein	Freiburg
Entschleunigung der Gesellschaft -> Mehr Achtsamkeit für das Umfeld	4	O	Q				0	Orange	nein	Freiburg
Einkaufsläden ohne Verpackung	4	A	S				1	Blau	ja	Freiburg
Trennung von Produzent/in und Konsument/in aufheben	4	E	G				4	Blau	ja	Freiburg
Obstkörbe für Büros (regional & saisonal)	4	A	J	K			1	Blau	ja	Freiburg
Exkursionen „Hinter die Kulissen schauen“ (z.B. was passiert mit Biomüll, wie wird der Markt beliefert?) für Stadtteile/ Quartiere	4	B	R				3	Blau	ja	Freiburg
Energie sparen beim Kochen für Viele	4	M					1	Blau	ja	Freiburg
Integrierte Produktion/ Verarbeitung in der Stadt z.B.: Urban Gardening, Kulturacker	4	E	G	R			5	Blau	ja	Freiburg
Mehr Zeitressourcen für Menschen schaffen	4	Q					6	Blau	ja	Freiburg
Unternehmen bieten Bio-Lebensmittel in der Verpflegung an	4	A	I				1	Blau	ja	Freiburg
Gruppen, die gemeinsam zu den Erzeugern fahren	4	B	E	G			1	Blau	nein	Freiburg
Gemeinsames Ernten mit „Arbeit“ dem Erzeuger Dienstleistung <-> Erzeugnis	4	E	G				0	Blau	nein	Freiburg
Gesundes Fast Food	4	A					0	Blau	nein	Freiburg
Bio-Fast Food Läden	4	A	I				0	Blau	nein	Freiburg
Kräuter-/ Beeren-/ Waldspaziergänge: „Was bietet der Wald Essbares?“	4	B	E				0	Blau	nein	Freiburg
Austausch über das Essen/ Kochen (Werte, Bildung)	4	B	E	M	N		0	Blau	nein	Freiburg
Regionale Produktion unterstützen: „Frisches“ vom Markt holen	4	A	G	J			0	Blau	nein	Freiburg
Erfahrbar machen von Landwirtschaft -> Wertschätzung	4	G	O				0	Blau	nein	Freiburg
Naturschutztreffen bei Picknick und Lagerfeuer im Grünen (Gleichgesinnte treffen)	4	E					0	Blau	nein	Freiburg
Alte Rezepturen verwenden -> Landküche	4	M					0	Blau	nein	Freiburg
Vernetzung bestehender Initiativen	4	E					1	Grün	ja	Freiburg
Treffpunkt für Ideen von Initiativen. Gleichgesinnte, die etwas umsetzen möchten. Beratung zur Unterstützung von Start-up´s bieten	4	E					3	Grün	ja	Freiburg
Bildungsexkursionen: Neben Spaß, Sprach- und Kulturaustausch gezielt Klimaherausforderungen für die Ernährung erfahren und Lösungen in anderen Regionen und Ländern kennenlernen.	4	E	J	P			1	Grün	ja	Freiburg
Staatliche finanzielle Anreize schaffen für nachhaltige Produktion	4	F	G				3	Grün	ja	Freiburg
Evtl. neue Einsatzmöglichkeiten für „Unkraut“ (-> Unkraut als Ressource)	4						2	Grün	ja	Freiburg
Staatliche Förderung für vielfältige und kleinteilige Landwirtschaft -> preisliche Attraktivität	4	F	G				3	Grün	ja	Freiburg
Einbindung in Landwirtschaft durch räumliche Nähe (Gemüse in der Stadt) -> Verbundenheit	4	G	R				3	Grün	ja	Freiburg
Ausdifferenzierte Bildungslandschaft (Meinungsbildung, Information, Verbundenheit durch Erfahrungen)	4	B					1	Grün	nein	Freiburg
Verpackungsfreie Lebensmittel	4	S					1	Grün	nein	Freiburg
Dienstleistungen bei Erzeuger (Bauer etc.) als Alternativ-Währung (teilweise)	4	G	H				1	Grün	nein	Freiburg
Breite Werbung für nachhaltigen Konsum	4	D					0	Grün	nein	Freiburg
Ansprechen verschiedener Zielgruppen durch unterschiedliche Methoden und Themen	4	B	D				0	Grün	nein	Freiburg
Umbenennung von Unkraut -> Beikräuter	4						0	Grün	nein	Freiburg
Empathie für Landwirte schaffen	4	E	G	O			0	Grün	nein	Freiburg
Ressourcen schonen für Art und Weise der Lebensmittelherstellung	4	G					0	Grün	nein	Freiburg
Austausch von Praxiserfahrung zwischen Erzeuger/ Konsument <-> Konsument/ Erzeuger	4	B	E	G			0	Grün	nein	Freiburg
Bürger zu mehr Offenheit bezüglich regionaler Landwirtschaft bewegen	4	E	G	J			0	Grün	nein	Freiburg
Nachbarschaftskooperationen Raum und Struktur geben	4	E					0	Grün	nein	Freiburg
Werbung für nachhaltig hergestellte Produkte	4	D					1	Rot	ja	Freiburg
Begrenzung für Betriebsgrößen	4	F	G				2	Rot	ja	Freiburg
Herstellungsmethoden transparent machen (gläserne Produktion, Hofläden, Internetplattformen, Apps, Mitarbeiten auf dem Hof als „Fitnessstudio im Freien“)	4	C	D	G			1	Rot	ja	Freiburg
Soziales Lernen von klein auf	4	B					2	Rot	ja	Freiburg
Erlöse für Produzent/innen erhöhen -> Preis sollte bei Produzent/innen ankommen	4	G					1	Rot	ja	Freiburg
Landvergabe nach sozialen Aspekten	4	G					3	Rot	ja	Freiburg
Viele kleine, regionale Lebensmittelhersteller	4	G	J				2	Rot	ja	Freiburg
Labeling für qualitative Lebensmittel	4	C					1	Rot	nein	Freiburg
Ausreichende Produktion von „guten“ Lebensmitteln in allen Regionen	4	G	J				1	Rot	nein	Freiburg
Glyphosatverbot	4	F					1	Rot	nein	Freiburg
Kleine Lebensmittelgeschäfte sollen gefördert werden -> breite Streuung	4	A					1	Rot	nein	Freiburg
Dezentralisierung der Lebensmittelproduktion -> Viele kleine lokale Unternehmen (gib Multikonzernen keine Chance)	4	A	G				1	Rot	nein	Freiburg
Umweltauflagen um Bodenfruchtbarkeit und Wasserqualität zu erhalten	4	F					1	Rot	nein	Freiburg
Vorschriften für Transparenz und Nachvollziehbarkeit	4	C	F				1	Rot	nein	Freiburg
Vielfältiges Angebot an Lebensmitteln	4	A					0	Rot	nein	Freiburg
Wissenstransfer von Information zu Inhalt und Produktion der Lebensmittel in allen Gesellschaftsschichten	4	B	E				0	Rot	nein	Freiburg
Subvention von Kleinbauern	4	F	G				0	Rot	nein	Freiburg
Saatgutvielfalt erhalten und erlauben/ fördern	4	F	G				0	Rot	nein	Freiburg
Vermarktung von überproduzierten Produkten innerhalb eines Radius von 500 km	4	A					0	Rot	nein	Freiburg
Das Thema „Ernährung“ in Medien stärker verbreiten	4	D					0	Rot	nein	Freiburg
Verbot von Landgrabbing -> Land für Subsistenzlandwirtschaft	4	F					0	Rot	nein	Freiburg
Kennzeichnungspflicht	4	F	C				0	Rot	nein	Freiburg
Preisstabilität/ -sicherheit schaffen	4	H					0	Rot	nein	Freiburg
Zertifizierung von Bioprodukten und Kontrolle, Verbot von Pseudo-Zertifizierung	4	F	I				0	Rot	nein	Freiburg
Bio-Subventionen	4	F	I				0	Rot	nein	Freiburg
Zusammensetzung einzelner Zutaten und deren Wirkung verstehen lernen für eine ausgewogene Ernährung z.B. Ayurveda	4	B					0	Rot	nein	Freiburg
Pflanzenschutzmittel ganzheitlich untersuchen	4	B					0	Rot	nein	Freiburg
Bürokratie reduzieren	4	F					0	Rot	nein	Freiburg
Transparente und faktentreue Berichterstattung mit wissenschaftlicher Grundlage	4	B	C	D			0	Rot	nein	Freiburg
Besseren Zugang zu Land für Kleinbauern	4	G					0	Rot	nein	Freiburg
